# Supplementary material for: The Small Heat Shock Protein α-Crystallin B Shows Neuroprotective Properties in a Glaucoma Animal Model
Source: MDPI journal article supplement (doi:10.3390/ijms18112418), 2017-11-14
Supplement: s1 [file s1]

| Protein name                                                                  | Gene name            | Fold-change ratio | Regulation | Mean intensity Alpha Crystallin B Group | Mean intensity PBS Group |
|-------------------------------------------------------------------------------|----------------------|-------------------|------------|-----------------------------------------|--------------------------|
| [Protein ADP-ribosylarginine] hydrolase                                       | <i>Adprh</i>         | 1.05              | Down       | 257455000                               | 269192500                |
| 1,2-dihydroxy-3-keto-5-methylthiopentene dioxygenase                          | <i>Adi1</i>          | 1.07              | Down       | 178780000                               | 191163333.3              |
| 1,5-anhydro-D-fructose reductase                                              | <i>Akr1e2</i>        | 1.09              | Up         | 137495000                               | 125682500                |
| 10 kDa heat shock protein, mitochondrial                                      | <i>Hspe1</i>         | 1.08              | Up         | 3640325000                              | 3373075000               |
| 14-3-3 protein beta/alpha;14-3-3 protein beta/alpha, N-terminally processed   | <i>Ywhab</i>         | 1.15              | Down       | 4566050000                              | 5269750000               |
| 14-3-3 protein epsilon                                                        | <i>Ywhae</i>         | 1.06              | Up         | 28391750000                             | 26677000000              |
| 14-3-3 protein eta                                                            | <i>Ywhah</i>         | 1.29              | Up         | 1480585000                              | 1143457500               |
| 14-3-3 protein gamma;14-3-3 protein gamma, N-terminally processed             | <i>Ywhag</i>         | 1.28              | Up         | 9173550000                              | 7143750000               |
| 14-3-3 protein theta                                                          | <i>Ywhaq</i>         | 1.17              | Down       | 7575725000                              | 8845300000               |
| 14-3-3 protein zeta/delta                                                     | <i>Ywhaz</i>         | 1.02              | Up         | 31803750000                             | 31303000000              |
| 15 kDa selenoprotein                                                          | <i>Sep--15</i>       | 1.16              | Up         | 106431333.3                             | 91792333.33              |
| 1-phosphatidylinositol 4,5-bisphosphate phosphodiesterase beta-1              | <i>Plcb1</i>         | 1.27              | Up         | 98442000                                | 77787000                 |
| 1-phosphatidylinositol 4,5-bisphosphate phosphodiesterase delta-1             | <i>Plcd1</i>         | 1.03              | Up         | 499362500                               | 485430000                |
| 2,3-cyclic-nucleotide 3-phosphodiesterase                                     | <i>Cnp</i>           | 1.16              | Up         | 197505000                               | 169940000                |
| 2,5-phosphodiesterase 12                                                      | <i>Pde12</i>         | 1.19              | Up         | 205310000                               | 171906666.7              |
| 26S protease regulatory subunit 4                                             | <i>Psmc1</i>         | 1.07              | Down       | 1305142500                              | 1390025000               |
| 26S protease regulatory subunit 6A                                            | <i>Psmc3</i>         | 1.03              | Down       | 948675000                               | 974095000                |
| 26S protease regulatory subunit 6B                                            | <i>Psmc4</i>         | 1.03              | Up         | 1044927500                              | 1016400000               |
| 26S protease regulatory subunit 7                                             | <i>Psmc2</i>         | 1.17              | Up         | 2649625000                              | 2260000000               |
| 26S protease regulatory subunit 8                                             | <i>Psmc5</i>         | 1.15              | Down       | 1339350000                              | 1538450000               |
| 26S proteasome non-ATPase regulatory subunit 1                                | <i>Psmc1</i>         | 1.02              | Up         | 1608900000                              | 1573750000               |
| 26S proteasome non-ATPase regulatory subunit 11                               | <i>Psmc11</i>        | 1.04              | Up         | 1764875000                              | 1689700000               |
| 26S proteasome non-ATPase regulatory subunit 13                               | <i>Psmc13</i>        | 1.04              | Up         | 1525950000                              | 1473150000               |
| 26S proteasome non-ATPase regulatory subunit 2                                | <i>Psmc2</i>         | 1.05              | Down       | 2750025000                              | 2898425000               |
| 26S proteasome non-ATPase regulatory subunit 9                                | <i>Psmc9</i>         | 1.01              | Up         | 309247500                               | 306500000                |
| 2-oxoglutarate dehydrogenase, mitochondrial                                   | <i>Ogdh</i>          | 1.06              | Up         | 4804525000                              | 4541475000               |
| 2-oxoisovalerate dehydrogenase subunit alpha, mitochondrial                   | <i>Bckdha</i>        | 1.15              | Down       | 52596500                                | 60674500                 |
| 3(2),5-bisphosphate nucleotidase 1                                            | <i>Bpnt1</i>         | 1.04              | Down       | 2327075000                              | 2419275000               |
| 3-hydroxyacyl-CoA dehydrogenase type-2                                        | <i>Hsd17b10</i>      | 1.11              | Down       | 633920000                               | 700607500                |
| 3-hydroxyisobutyrate dehydrogenase, mitochondrial                             | <i>Hibadh</i>        | 1.10              | Up         | 3260550000                              | 2952425000               |
| 3-hydroxyisobutyryl-CoA hydrolase, mitochondrial                              | <i>Hibch</i>         | 1.08              | Up         | 385260000                               | 355667500                |
| 3-ketoacyl-CoA thiolase A, peroxisomal;3-ketoacyl-CoA thiolase B, peroxisomal | <i>Acaa1a;Acaa1b</i> | 1.10              | Up         | 689237500                               | 625102500                |
| 3-ketoacyl-CoA thiolase, mitochondrial                                        | <i>Acaa2</i>         | 1.08              | Up         | 221207500                               | 205072500                |
| 3-mercaptopyruvate sulfurtransferase                                          | <i>Mpst</i>          | 1.14              | Up         | 667047500                               | 582827500                |
| 3-phosphoinositide-dependent protein kinase 1                                 | <i>Pdk1</i>          | 1.12              | Down       | 39553000                                | 44429000                 |
| 40S ribosomal protein S10                                                     | <i>Rps10</i>         | 1.08              | Up         | 916310000                               | 849555000                |
| 40S ribosomal protein S11                                                     | <i>Rps11</i>         | 1.05              | Up         | 1330950000                              | 1268050000               |
| 40S ribosomal protein S12                                                     | <i>Rps12</i>         | 1.06              | Up         | 1467050000                              | 1378925000               |
| 40S ribosomal protein S13                                                     | <i>Rps13</i>         | 1.07              | Up         | 2175600000                              | 2037975000               |
| 40S ribosomal protein S14                                                     | <i>Rps14</i>         | 1.27              | Up         | 537087500                               | 423647500                |
| 40S ribosomal protein S15                                                     | <i>Rps15</i>         | 1.93              | Down       | 54261000                                | 104496000                |
| 40S ribosomal protein S15a                                                    | <i>Rps15a</i>        | 1.06              | Up         | 1880650000                              | 1768700000               |
| 40S ribosomal protein S16                                                     | <i>Rps16</i>         | 1.22              | Up         | 1647425000                              | 1352550000               |
| 40S ribosomal protein S17                                                     | <i>Rps17</i>         | 1.06              | Down       | 993427500                               | 1049500000               |
| 40S ribosomal protein S18                                                     | <i>Rps18</i>         | 1.15              | Up         | 1693150000                              | 1472975000               |

|                                                                                                                                                 |                |      |      |             |             |
|-------------------------------------------------------------------------------------------------------------------------------------------------|----------------|------|------|-------------|-------------|
| 40S ribosomal protein S19                                                                                                                       | <i>Rps19</i>   | 1.18 | Up   | 2143725000  | 1813525000  |
| 40S ribosomal protein S20                                                                                                                       | <i>Rps20</i>   | 1.48 | Up   | 1026377500  | 692472500   |
| 40S ribosomal protein S21                                                                                                                       | <i>Rps21</i>   | 1.26 | Up   | 113720000   | 90330000    |
| 40S ribosomal protein S23                                                                                                                       | <i>Rps23</i>   | 1.14 | Down | 563745000   | 641480000   |
| 40S ribosomal protein S24                                                                                                                       | <i>Rps24</i>   | 1.21 | Up   | 600610000   | 497205000   |
| 40S ribosomal protein S25                                                                                                                       | <i>Rps25</i>   | 1.12 | Up   | 1911625000  | 1701475000  |
| 40S ribosomal protein S26                                                                                                                       | <i>Rps26</i>   | 1.16 | Up   | 722152500   | 622260000   |
| 40S ribosomal protein S27                                                                                                                       | <i>Rps27</i>   | 1.45 | Up   | 338790000   | 232900000   |
| 40S ribosomal protein S29                                                                                                                       | <i>Rps29</i>   | 1.14 | Down | 290220000   | 331617500   |
| 40S ribosomal protein S3                                                                                                                        | <i>Rps3</i>    | 1.09 | Up   | 3608025000  | 3305800000  |
| 40S ribosomal protein S3a;40S ribosomal protein S3b                                                                                             | <i>Rps3a</i>   | 1.04 | Down | 2284700000  | 2369375000  |
| 40S ribosomal protein S4, X isoform                                                                                                             | <i>Rps4x</i>   | 1.11 | Down | 2918725000  | 3229850000  |
| 40S ribosomal protein S5;40S ribosomal protein S5, N-terminally processed                                                                       | <i>Rps5</i>    | 1.02 | Up   | 1149687500  | 1121727500  |
| 40S ribosomal protein S6                                                                                                                        | <i>Rps6</i>    | 1.22 | Up   | 634252500   | 521027500   |
| 40S ribosomal protein S7                                                                                                                        | <i>Rps7</i>    | 1.07 | Up   | 1881800000  | 1754150000  |
| 40S ribosomal protein S8                                                                                                                        | <i>Rps8</i>    | 1.02 | Down | 2324925000  | 2361200000  |
| 40S ribosomal protein S9                                                                                                                        | <i>Rps9</i>    | 1.14 | Up   | 668830000   | 584300000   |
| 40S ribosomal protein SA                                                                                                                        | <i>Rpsa</i>    | 1.03 | Up   | 4319850000  | 4184700000  |
| 4-aminobutyrate aminotransferase, mitochondrial;4-aminobutyrate aminotransferase, brain isoform;4-aminobutyrate aminotransferase, liver isoform | <i>Abat</i>    | 1.03 | Up   | 10636300000 | 10277150000 |
| 4F2 cell-surface antigen heavy chain                                                                                                            | <i>Slc3a2</i>  | 1.09 | Up   | 5547950000  | 5103125000  |
| 4-trimethylaminobutyraldehyde dehydrogenase                                                                                                     | <i>Aldh9a1</i> | 1.05 | Down | 2645750000  | 2770100000  |
| 5-nucleotidase                                                                                                                                  | <i>Nt5e</i>    | 1.22 | Up   | 637675000   | 524675000   |
| 5-nucleotidase domain-containing protein 2                                                                                                      | <i>Nt5dc2</i>  | 1.28 | Up   | 98444000    | 76857000    |
| 5-oxoprolinase                                                                                                                                  | <i>Oplah</i>   | 1.14 | Up   | 125896666.7 | 110167500   |
| 6.8 kDa mitochondrial proteolipid                                                                                                               | <i>Mp68</i>    | 1.14 | Up   | 418130000   | 367806666.7 |
| 60 kDa heat shock protein, mitochondrial                                                                                                        | <i>Hspd1</i>   | 1.04 | Up   | 13963250000 | 13412250000 |
| 60S acidic ribosomal protein P0                                                                                                                 | <i>Rplp0</i>   | 1.09 | Up   | 3038225000  | 2777275000  |
| 60S acidic ribosomal protein P1                                                                                                                 | <i>Rplp1</i>   | 1.23 | Down | 593967500   | 729493333.3 |
| 60S acidic ribosomal protein P2                                                                                                                 | <i>Rplp2</i>   | 1.25 | Up   | 173975000   | 139360000   |
| 60S ribosomal protein L10                                                                                                                       | <i>Rpl10</i>   | 1.25 | Down | 912750000   | 1144975000  |
| 60S ribosomal protein L10a                                                                                                                      | <i>Rpl10a</i>  | 1.10 | Up   | 2076125000  | 1888875000  |
| 60S ribosomal protein L11                                                                                                                       | <i>Rpl11</i>   | 1.14 | Down | 1360992500  | 1558150000  |
| 60S ribosomal protein L12                                                                                                                       | <i>Rpl12</i>   | 1.10 | Down | 1771925000  | 1945600000  |
| 60S ribosomal protein L13                                                                                                                       | <i>Rpl13</i>   | 1.16 | Down | 1027702500  | 1188047500  |
| 60S ribosomal protein L13a                                                                                                                      | <i>Rpl13a</i>  | 1.10 | Down | 152182500   | 168000000   |
| 60S ribosomal protein L14                                                                                                                       | <i>Rpl14</i>   | 1.11 | Up   | 935482500   | 843952500   |
| 60S ribosomal protein L15                                                                                                                       | <i>Rpl15</i>   | 1.02 | Up   | 1389175000  | 1362600000  |
| 60S ribosomal protein L17                                                                                                                       | <i>Rpl17</i>   | 1.07 | Down | 525085000   | 561830000   |
| 60S ribosomal protein L18                                                                                                                       | <i>Rpl18</i>   | 1.35 | Up   | 114355000   | 84521000    |
| 60S ribosomal protein L18a                                                                                                                      | <i>Rpl18a</i>  | 1.08 | Down | 1198927500  | 1293650000  |
| 60S ribosomal protein L19                                                                                                                       | <i>Rpl19</i>   | 1.01 | Down | 543222500   | 551110000   |
| 60S ribosomal protein L21                                                                                                                       | <i>Rpl21</i>   | 1.13 | Up   | 600377500   | 532590000   |
| 60S ribosomal protein L22                                                                                                                       | <i>Rpl22</i>   | 1.15 | Down | 463772500   | 535625000   |
| 60S ribosomal protein L23                                                                                                                       | <i>Rpl23</i>   | 1.13 | Up   | 1345450000  | 1186150000  |
| 60S ribosomal protein L23a                                                                                                                      | <i>Rpl23a</i>  | 1.10 | Down | 906235000   | 995380000   |
| 60S ribosomal protein L24                                                                                                                       | <i>Rpl24</i>   | 1.11 | Up   | 835130000   | 750180000   |
| 60S ribosomal protein L26                                                                                                                       | <i>Rpl26</i>   | 1.02 | Down | 946687500   | 961825000   |
| 60S ribosomal protein L27                                                                                                                       | <i>Rpl27</i>   | 1.10 | Up   | 1519625000  | 1380675000  |
| 60S ribosomal protein L27a                                                                                                                      | <i>Rpl27a</i>  | 1.07 | Down | 656546666.7 | 701147500   |
| 60S ribosomal protein L28                                                                                                                       | <i>Rpl28</i>   | 1.02 | Down | 413895000   | 420792500   |
| 60S ribosomal protein L29                                                                                                                       | <i>Rpl29</i>   | 1.03 | Down | 287025000   | 296287500   |
| 60S ribosomal protein L3                                                                                                                        | <i>Rpl3</i>    | 1.02 | Up   | 1451900000  | 1424825000  |
| 60S ribosomal protein L30                                                                                                                       | <i>Rpl30</i>   | 1.12 | Up   | 1111527500  | 991357500   |
| 60S ribosomal protein L31                                                                                                                       | <i>Rpl31</i>   | 1.04 | Up   | 760957500   | 729600000   |
| 60S ribosomal protein L32                                                                                                                       | <i>Rpl32</i>   | 1.55 | Down | 511965000   | 792492500   |

|                                                                     |                          |      |      |             |             |
|---------------------------------------------------------------------|--------------------------|------|------|-------------|-------------|
| 60S ribosomal protein L34                                           | <i>Rpl34</i>             | 1.01 | Up   | 266687500   | 264167500   |
| 60S ribosomal protein L35                                           | <i>Rpl35</i>             | 1.41 | Up   | 636755000   | 452895000   |
| 60S ribosomal protein L35a                                          | <i>Rpl35a</i>            | 1.10 | Up   | 377240000   | 341496666.7 |
| 60S ribosomal protein L36                                           | <i>Rpl36</i>             | 1.05 | Up   | 341623333.3 | 324070000   |
| 60S ribosomal protein L37a;Putative 60S ribosomal protein L37a      | <i>Rpl37a;Rpl37a-ps1</i> | 1.10 | Up   | 184147500   | 166670000   |
| 60S ribosomal protein L38                                           | <i>Rpl38</i>             | 1.04 | Down | 499545000   | 517732500   |
| 60S ribosomal protein L4                                            | <i>Rpl4</i>              | 1.12 | Up   | 834195000   | 746915000   |
| 60S ribosomal protein L5                                            | <i>Rpl5</i>              | 1.08 | Up   | 2899450000  | 2685300000  |
| 60S ribosomal protein L6                                            | <i>Rpl6</i>              | 1.19 | Up   | 286527500   | 241617500   |
| 60S ribosomal protein L7                                            | <i>Rpl7</i>              | 1.26 | Up   | 173473333.3 | 137883333.3 |
| 60S ribosomal protein L7a                                           | <i>Rpl7a</i>             | 1.12 | Up   | 2025175000  | 1815675000  |
| 60S ribosomal protein L8                                            | <i>Rpl8</i>              | 1.37 | Down | 1050802500  | 1440800000  |
| 60S ribosomal protein L9                                            | <i>Rpl9</i>              | 1.08 | Up   | 1534050000  | 1419225000  |
| 6-phosphogluconate dehydrogenase, decarboxylating                   | <i>Pgd</i>               | 1.02 | Up   | 2681025000  | 2621600000  |
| 6-phosphogluconolactonase                                           | <i>Pgls</i>              | 1.07 | Up   | 883607500   | 822217500   |
| 78 kDa glucose-regulated protein                                    | <i>Hspa5</i>             | 1.06 | Up   | 9451150000  | 8902225000  |
| 7-methylguanosine phosphate-specific 5-nucleotidase                 | <i>Nt5c3b</i>            | 1.43 | Down | 32874000    | 47013000    |
| Abhydrolase domain-containing protein 16A                           | <i>Abhd16a</i>           | 1.06 | Up   | 300337500   | 283630000   |
| Abl interactor 1                                                    | <i>Abi1</i>              | 1.01 | Up   | 509955000   | 503755000   |
| Acetylcholinesterase                                                | <i>Ache</i>              | 1.05 | Down | 147713333.3 | 154377500   |
| Acetyl-CoA acetyltransferase, cytosolic                             | <i>Acat2</i>             | 1.02 | Up   | 848120000   | 827932500   |
| Acetyl-CoA acetyltransferase, mitochondrial                         | <i>Acat1</i>             | 1.09 | Down | 2068875000  | 2254475000  |
| Acetyl-CoA carboxylase 1;Biotin carboxylase                         | <i>Acaca</i>             | 1.72 | Up   | 254480000   | 147957500   |
| Acid ceramidase                                                     | <i>Asah1</i>             | 1.47 | Up   | 368830000   | 251067500   |
| Acidic leucine-rich nuclear phosphoprotein 32 family member A       | <i>Anp32a</i>            | 1.02 | Down | 10632275000 | 10841725000 |
| Acidic leucine-rich nuclear phosphoprotein 32 family member B       | <i>Anp32b</i>            | 1.02 | Down | 2343125000  | 2381275000  |
| Acidic leucine-rich nuclear phosphoprotein 32 family member E       | <i>Anp32e</i>            | 1.07 | Up   | 5487725000  | 5135225000  |
| Aconitate hydratase, mitochondrial                                  | <i>Aco2</i>              | 1.05 | Up   | 20599750000 | 19698000000 |
| Actin, alpha cardiac muscle 1;Actin, alpha skeletal muscle          | <i>Actc1;Acta1</i>       | 1.37 | Down | 12702000000 | 17356250000 |
| Actin, aortic smooth muscle;Actin, gamma-enteric smooth muscle      | <i>Acta2;Actg2</i>       | 1.35 | Down | 472876666.7 | 637197500   |
| Actin, cytoplasmic 2;Actin, cytoplasmic 2, N-terminally processed   | <i>Actg1</i>             | 1.01 | Up   | 1.02274E+11 | 1.01394E+11 |
| Actin-binding LIM protein 2                                         | <i>Ablim2</i>            | 1.08 | Up   | 144640000   | 134360000   |
| Actin-related protein 2                                             | <i>Actr2</i>             | 1.04 | Down | 1398825000  | 1453100000  |
| Actin-related protein 2/3 complex subunit 1A                        | <i>Arpc1a</i>            | 1.09 | Up   | 1410200000  | 1298225000  |
| Actin-related protein 2/3 complex subunit 2                         | <i>Arpc2</i>             | 1.06 | Down | 1426550000  | 1510550000  |
| Actin-related protein 2/3 complex subunit 5                         | <i>Arpc5</i>             | 1.32 | Up   | 250406666.7 | 189970000   |
| Actin-related protein 2/3 complex subunit 5-like protein            | <i>Arpc5l</i>            | 1.01 | Up   | 187670000   | 184930000   |
| Actin-related protein 3                                             | <i>Actr3</i>             | 1.04 | Up   | 2093600000  | 2017725000  |
| Activated RNA polymerase II transcriptional coactivator p15         | <i>Sub1</i>              | 2.24 | Up   | 1161980000  | 518802500   |
| Activity-dependent neuroprotector homeobox protein                  | <i>Adnp</i>              | 1.82 | Down | 62292500    | 113136000   |
| Acylamino-acid-releasing enzyme                                     | <i>Apeh</i>              | 1.32 | Up   | 218070000   | 165086666.7 |
| Acyl-CoA-binding protein;Triakontatetrapeptide;Octadecaneuropeptide | <i>Dbi</i>               | 1.10 | Down | 2180975000  | 2390150000  |

|                                                                                                                                           |                    |      |      |             |             |
|-------------------------------------------------------------------------------------------------------------------------------------------|--------------------|------|------|-------------|-------------|
| Acyl-coenzyme A thioesterase 2, mitochondrial;Acyl-coenzyme A thioesterase 1                                                              | <i>Acot2;Acot1</i> | 1.12 | Down | 126033333.3 | 140630000   |
| Acyl-coenzyme A thioesterase 8                                                                                                            | <i>Acot8</i>       | 1.13 | Up   | 63475500    | 56354000    |
| Acyl-coenzyme A thioesterase THEM4                                                                                                        | <i>Them4</i>       | 1.10 | Up   | 159545000   | 145390000   |
| Acyl-protein thioesterase 1                                                                                                               | <i>Lypla1</i>      | 1.02 | Down | 401245000   | 410466666.7 |
| Acyl-protein thioesterase 2                                                                                                               | <i>Lypla2</i>      | 1.01 | Up   | 1242650000  | 1236275000  |
| Acylpyruvase FAHD1, mitochondrial                                                                                                         | <i>Fahd1</i>       | 1.07 | Down | 183760000   | 196827500   |
| Adapter molecule crk                                                                                                                      | <i>Crk</i>         | 1.08 | Up   | 706272500   | 654675000   |
| Adaptin ear-binding coat-associated protein 1                                                                                             | <i>Necap1</i>      | 1.01 | Down | 319975000   | 324070000   |
| Adenine phosphoribosyltransferase                                                                                                         | <i>Aprt</i>        | 1.01 | Up   | 661190000   | 655415000   |
| Adenosine kinase                                                                                                                          | <i>Adk</i>         | 1.08 | Down | 701867500   | 756380000   |
| Adenosylhomocysteinase                                                                                                                    | <i>Ahcy</i>        | 1.15 | Down | 13610500000 | 15655000000 |
| Adenosylhomocysteinase                                                                                                                    | <i>Ahcyl1</i>      | 1.19 | Down | 2421700000  | 2887000000  |
| Adenylate kinase 4, mitochondrial                                                                                                         | <i>Ak4</i>         | 1.05 | Down | 181402500   | 190592500   |
| Adenylate kinase isoenzyme 1                                                                                                              | <i>Ak1</i>         | 1.05 | Down | 4301300000  | 4536850000  |
| Adenylyl cyclase-associated protein 1                                                                                                     | <i>Cap1</i>        | 1.21 | Down | 2795375000  | 3380875000  |
| Adenylyl cyclase-associated protein 2                                                                                                     | <i>Cap2</i>        | 1.25 | Down | 143705000   | 180296666.7 |
| Adipocyte plasma membrane-associated protein                                                                                              | <i>Apmap</i>       | 1.16 | Down | 415505000   | 479962500   |
| ADP/ATP translocase 1                                                                                                                     | <i>Slc25a4</i>     | 1.05 | Up   | 37247750000 | 35407250000 |
| ADP/ATP translocase 2;ADP/ATP translocase 2, N-terminally processed                                                                       | <i>Slc25a5</i>     | 1.22 | Up   | 10214525000 | 8366075000  |
| ADP-ribose pyrophosphatase, mitochondrial                                                                                                 | <i>Nudt9</i>       | 1.01 | Down | 310900000   | 314560000   |
| ADP-ribosylation factor 1;ADP-ribosylation factor 3                                                                                       | <i>Arf1;Arf3</i>   | 1.17 | Up   | 4661300000  | 3999650000  |
| ADP-ribosylation factor 4                                                                                                                 | <i>Arf4</i>        | 1.11 | Up   | 405750000   | 364362500   |
| ADP-ribosylation factor 5                                                                                                                 | <i>Arf5</i>        | 1.09 | Up   | 4263550000  | 3910525000  |
| ADP-ribosylation factor 6                                                                                                                 | <i>Arf6</i>        | 1.13 | Up   | 465700000   | 413247500   |
| ADP-ribosylation factor GTPase-activating protein 1                                                                                       | <i>Arfgap1</i>     | 1.01 | Up   | 120410000   | 118670000   |
| ADP-ribosylation factor GTPase-activating protein 2                                                                                       | <i>Arfgap2</i>     | 1.28 | Up   | 94163000    | 73747000    |
| ADP-ribosylation factor-like protein 1                                                                                                    | <i>Arl1</i>        | 1.04 | Up   | 255546666.7 | 244767500   |
| ADP-ribosylation factor-like protein 3                                                                                                    | <i>Arl3</i>        | 1.05 | Down | 1806000000  | 1892225000  |
| ADP-ribosylation factor-like protein 8B                                                                                                   | <i>Arl8b</i>       | 1.02 | Down | 863895000   | 881722500   |
| ADP-sugar pyrophosphatase                                                                                                                 | <i>Nudt5</i>       | 2.13 | Up   | 130560000   | 61229000    |
| Afadin                                                                                                                                    | <i>Millt4</i>      | 1.09 | Up   | 208563333.3 | 191273333.3 |
| Aflatoxin B1 aldehyde reductase member 2                                                                                                  | <i>Akr7a2</i>      | 1.10 | Down | 2254675000  | 2486050000  |
| Agrin;Agrin N-terminal 110 kDa subunit;Agrin C-terminal 110 kDa subunit;Agrin C-terminal 90 kDa fragment;Agrin C-terminal 22 kDa fragment | <i>Agrn</i>        | 1.28 | Up   | 82287000    | 64526000    |
| AH receptor-interacting protein                                                                                                           | <i>Aip</i>         | 1.00 | Up   | 374242500   | 373342500   |
| A-kinase anchor protein 12                                                                                                                | <i>Akap12</i>      | 1.10 | Up   | 242190000   | 221150000   |
| A-kinase anchor protein SPHKAP                                                                                                            | <i>Sphkap</i>      | 1.10 | Up   | 130840000   | 119040000   |
| Alanine--tRNA ligase, cytoplasmic                                                                                                         | <i>Aars</i>        | 1.02 | Up   | 3537650000  | 3451400000  |
| Alanyl-tRNA editing protein Aarsd1                                                                                                        | <i>Aarsd1</i>      | 1.02 | Down | 391677500   | 401222500   |
| Alcohol dehydrogenase [NADP(+)]                                                                                                           | <i>Akr1a1</i>      | 1.09 | Down | 4444050000  | 4822525000  |
| Alcohol dehydrogenase class-3                                                                                                             | <i>Adh5</i>        | 1.01 | Down | 3352925000  | 3380875000  |
| Aldehyde dehydrogenase X, mitochondrial                                                                                                   | <i>Aldh1b1</i>     | 1.20 | Up   | 113945000   | 94674333.33 |
| Aldehyde dehydrogenase, mitochondrial                                                                                                     | <i>Aldh2</i>       | 1.09 | Up   | 665385000   | 613030000   |
| Aldose reductase                                                                                                                          | <i>Akr1b1</i>      | 1.02 | Up   | 9723375000  | 9498500000  |
| Aldose reductase-related protein 1                                                                                                        | <i>Akr1b7</i>      | 1.14 | Down | 699993333.3 | 800652500   |
| Alpha/beta hydrolase domain-containing protein 14B                                                                                        | <i>Abhd14b</i>     | 1.07 | Up   | 1364250000  | 1276375000  |
| Alpha-1-antiproteinase                                                                                                                    | <i>Serpina1</i>    | 1.04 | Down | 302680000   | 314587500   |
| Alpha-1B-glycoprotein                                                                                                                     | <i>A1bg</i>        | 1.68 | Up   | 142690000   | 84804000    |
| Alpha-1-inhibitor 3                                                                                                                       | <i>A1i3</i>        | 1.16 | Down | 1021540000  | 1186125000  |

|                                                                                                                                                                                                                |                |      |      |             |             |
|----------------------------------------------------------------------------------------------------------------------------------------------------------------------------------------------------------------|----------------|------|------|-------------|-------------|
| Alpha-1-macroglobulin;Alpha-1-macroglobulin 45 kDa subunit                                                                                                                                                     | <i>A1m</i>     | 1.05 | Down | 800012500   | 841485000   |
| Alpha-2-HS-glycoprotein                                                                                                                                                                                        | <i>Ahsg</i>    | 1.19 | Up   | 175655000   | 147322500   |
| Alpha-2-macroglobulin                                                                                                                                                                                          | <i>A2m</i>     | 1.50 | Down | 535727500   | 803017500   |
| Alpha-2-macroglobulin receptor-associated protein                                                                                                                                                              | <i>Lrpap1</i>  | 1.05 | Up   | 154600000   | 146760000   |
| Alpha-actinin-1                                                                                                                                                                                                | <i>Actn1</i>   | 1.12 | Down | 229507500   | 257615000   |
| Alpha-actinin-4                                                                                                                                                                                                | <i>Actn4</i>   | 1.04 | Down | 7128725000  | 7439875000  |
| Alpha-adducin                                                                                                                                                                                                  | <i>Add1</i>    | 1.13 | Down | 4178075000  | 4729775000  |
| Alpha-aminoadipic semialdehyde dehydrogenase                                                                                                                                                                   | <i>Aldh7a1</i> | 1.00 | Up   | 1916500000  | 1910850000  |
| Alpha-centractin                                                                                                                                                                                               | <i>Actr1a</i>  | 1.10 | Up   | 3383100000  | 3080450000  |
| Alpha-crystallin A chain;Alpha-crystallin A(1-168);Alpha-crystallin A(1-165);Alpha-crystallin A(1-163);Alpha-crystallin A(1-162);Alpha-crystallin A(1-157);Alpha-crystallin A(1-156);Alpha-crystallin A(1-151) | <i>Cryaa</i>   | 1.22 | Up   | 840432500   | 690380000   |
| Alpha-crystallin B chain                                                                                                                                                                                       | <i>Cryab</i>   | 1.22 | Up   | 541445000   | 445427500   |
| Alpha-crystallin B chain                                                                                                                                                                                       | <i>Cryab</i>   | 1.12 | Up   | 630605000   | 564887500   |
| Alpha-enolase                                                                                                                                                                                                  | <i>Eno1</i>    | 1.04 | Up   | 1.69143E+11 | 1.623E+11   |
| Alpha-internexin                                                                                                                                                                                               | <i>Ina</i>     | 2.32 | Down | 636297500   | 1474150000  |
| Alpha-mannosidase 2C1                                                                                                                                                                                          | <i>Man2c1</i>  | 1.11 | Up   | 181055000   | 162952500   |
| Alpha-methylacyl-CoA racemase                                                                                                                                                                                  | <i>Amacr</i>   | 1.10 | Up   | 50960333.33 | 46536250    |
| Alpha-N-acetylgalactosaminidase                                                                                                                                                                                | <i>Naga</i>    | 1.01 | Down | 145817500   | 147486666.7 |
| Alpha-soluble NSF attachment protein                                                                                                                                                                           | <i>Napa</i>    | 1.07 | Up   | 1635600000  | 1533625000  |
| Amine oxidase [flavin-containing] A                                                                                                                                                                            | <i>Maoa</i>    | 1.07 | Up   | 1697075000  | 1580975000  |
| Amine oxidase [flavin-containing] B                                                                                                                                                                            | <i>Maob</i>    | 1.34 | Down | 298875000   | 400160000   |
| Aminoacyl tRNA synthase complex-interacting multifunctional protein 2                                                                                                                                          | <i>Aimp2</i>   | 1.12 | Down | 192152000   | 214738500   |
| Aminoacylase-1A                                                                                                                                                                                                | <i>Acy1a</i>   | 1.06 | Up   | 957452500   | 903190000   |
| Aminopeptidase B                                                                                                                                                                                               | <i>Rnpep</i>   | 1.16 | Up   | 3195900000  | 2766150000  |
| AMP deaminase 2                                                                                                                                                                                                | <i>Ampd2</i>   | 1.18 | Down | 666775000   | 790005000   |
| AMP deaminase 3                                                                                                                                                                                                | <i>Ampd3</i>   | 1.22 | Down | 66268000    | 80873000    |
| Amphiphysin                                                                                                                                                                                                    | <i>Amph</i>    | 1.04 | Up   | 4026575000  | 3876650000  |
| Amyloid-like protein 2                                                                                                                                                                                         | <i>Aplp2</i>   | 1.12 | Down | 81971000    | 91614000    |
| Anamorsin                                                                                                                                                                                                      | <i>Ciapi1</i>  | 1.04 | Down | 405500000   | 422887500   |
| Anion exchange protein 2                                                                                                                                                                                       | <i>Slc4a2</i>  | 1.57 | Up   | 75682500    | 48292000    |
| Ankyrin-3                                                                                                                                                                                                      | <i>Ank3</i>    | 1.01 | Down | 884227500   | 894467500   |
| Annexin A1                                                                                                                                                                                                     | <i>Anxa1</i>   | 1.07 | Down | 261662500   | 279700000   |
| Annexin A2                                                                                                                                                                                                     | <i>Anxa2</i>   | 1.01 | Up   | 897677500   | 887665000   |
| Annexin A3                                                                                                                                                                                                     | <i>Anxa3</i>   | 1.03 | Up   | 804742500   | 778235000   |
| Annexin A5                                                                                                                                                                                                     | <i>Anxa5</i>   | 1.18 | Up   | 2443300000  | 2076975000  |
| Annexin A6                                                                                                                                                                                                     | <i>Anxa6</i>   | 1.29 | Up   | 1461050000  | 1133925000  |
| AP-1 complex subunit beta-1                                                                                                                                                                                    | <i>Ap1b1</i>   | 1.09 | Up   | 3131300000  | 2875100000  |
| AP-1 complex subunit mu-1                                                                                                                                                                                      | <i>Ap1m1</i>   | 1.11 | Up   | 441590000   | 399427500   |
| AP-2 complex subunit alpha-2                                                                                                                                                                                   | <i>Ap2a2</i>   | 1.06 | Up   | 13933750000 | 13094750000 |
| AP-2 complex subunit beta                                                                                                                                                                                      | <i>Ap2b1</i>   | 1.07 | Up   | 11111075000 | 10372900000 |
| AP-2 complex subunit mu                                                                                                                                                                                        | <i>Ap2m1</i>   | 1.04 | Up   | 5599075000  | 5363400000  |
| AP-2 complex subunit sigma                                                                                                                                                                                     | <i>Ap2s1</i>   | 1.05 | Down | 882905000   | 930420000   |
| AP2-associated protein kinase 1                                                                                                                                                                                | <i>Aak1</i>    | 1.00 | Up   | 1647175000  | 1641075000  |
| AP-3 complex subunit mu-2                                                                                                                                                                                      | <i>Ap3m2</i>   | 1.03 | Up   | 784062500   | 763630000   |
| Apolipoprotein A-I;Proapolipoprotein A-I                                                                                                                                                                       | <i>Apoa1</i>   | 1.15 | Down | 82080000    | 94529250    |
| Apolipoprotein E                                                                                                                                                                                               | <i>ApoE</i>    | 1.01 | Down | 468312500   | 474235000   |
| Apoptosis-inducing factor 1, mitochondrial                                                                                                                                                                     | <i>Aifm1</i>   | 1.02 | Up   | 581260000   | 571277500   |
| Aquaporin-4                                                                                                                                                                                                    | <i>Aqp4</i>    | 1.32 | Up   | 894137500   | 677605000   |
| ARF GTPase-activating protein GIT1                                                                                                                                                                             | <i>Git1</i>    | 1.07 | Up   | 98407000    | 92045666.67 |
| Arfaptin-2                                                                                                                                                                                                     | <i>Arfip2</i>  | 1.07 | Down | 134500000   | 143614666.7 |
| Arf-GAP domain and FG repeat-containing protein 1                                                                                                                                                              | <i>Agfg1</i>   | 1.06 | Down | 192722500   | 203992500   |
| Arf-GAP with SH3 domain, ANK repeat and PH domain-containing protein 1                                                                                                                                         | <i>Asap1</i>   | 1.00 | Up   | 125420000   | 125010000   |

|                                                           |                |      |      |             |             |
|-----------------------------------------------------------|----------------|------|------|-------------|-------------|
| Arginine and glutamate-rich protein 1                     | <i>Arglu1</i>  | 1.25 | Down | 38298000    | 47883000    |
| Arginine--tRNA ligase, cytoplasmic                        | <i>Rars</i>    | 1.09 | Down | 638097500   | 697227500   |
| Argininosuccinate lyase                                   | <i>Asl</i>     | 1.21 | Up   | 162370000   | 134703333.3 |
| Argininosuccinate synthase                                | <i>Ass1</i>    | 1.15 | Up   | 1958175000  | 1696350000  |
| Armadillo repeat-containing protein 10                    | <i>Armc10</i>  | 1.13 | Up   | 205442500   | 181335000   |
| Aryl-hydrocarbon-interacting protein-like 1               | <i>Aipl1</i>   | 1.04 | Up   | 788407500   | 754965000   |
| Asparagine synthetase [glutamine-hydrolyzing]             | <i>Asns</i>    | 1.28 | Down | 284210000   | 363932500   |
| Aspartate aminotransferase, cytoplasmic                   | <i>Got1</i>    | 1.00 | Down | 45113500000 | 45245250000 |
| Aspartate aminotransferase, mitochondrial                 | <i>Got2</i>    | 1.02 | Up   | 35240500000 | 34581000000 |
| Aspartate--tRNA ligase, cytoplasmic                       | <i>Dars</i>    | 1.01 | Up   | 1910350000  | 1889125000  |
| Astrocytic phosphoprotein PEA-15                          | <i>Pea15</i>   | 1.23 | Down | 297352500   | 367025000   |
| Ataxin-10                                                 | <i>Atxn10</i>  | 1.10 | Up   | 422640000   | 384730000   |
| Atlastin-1                                                | <i>Atl1</i>    | 1.11 | Down | 232990000   | 258257500   |
| ATP synthase F(0) complex subunit B1, mitochondrial       | <i>Atp5f1</i>  | 1.10 | Up   | 8043825000  | 7305850000  |
| ATP synthase protein 8                                    | <i>Mt-atp8</i> | 1.72 | Up   | 210400000   | 122442500   |
| ATP synthase subunit a                                    | <i>Mt-atp6</i> | 1.01 | Down | 78347000    | 78871666.67 |
| ATP synthase subunit alpha, mitochondrial                 | <i>Atp5a1</i>  | 1.07 | Up   | 66813500000 | 62618750000 |
| ATP synthase subunit beta, mitochondrial                  | <i>Atp5b</i>   | 1.12 | Up   | 96061750000 | 85841250000 |
| ATP synthase subunit d, mitochondrial                     | <i>Atp5h</i>   | 1.01 | Down | 7077925000  | 7153500000  |
| ATP synthase subunit e, mitochondrial                     | <i>Atp5i</i>   | 1.03 | Down | 1895875000  | 1949300000  |
| ATP synthase subunit epsilon, mitochondrial               | <i>Atp5e</i>   | 1.32 | Up   | 1247230000  | 942810000   |
| ATP synthase subunit f, mitochondrial                     | <i>Atp5j2</i>  | 1.06 | Up   | 2201750000  | 2078800000  |
| ATP synthase subunit g, mitochondrial                     | <i>Atp5l</i>   | 1.00 | Down | 3577375000  | 3591225000  |
| ATP synthase subunit gamma, mitochondrial                 | <i>Atp5c1</i>  | 1.13 | Up   | 8465225000  | 7470725000  |
| ATP synthase subunit O, mitochondrial                     | <i>Atp5o</i>   | 1.10 | Up   | 14240750000 | 12994500000 |
| ATPase family AAA domain-containing protein 1             | <i>Atad1</i>   | 1.02 | Up   | 777360000   | 759432500   |
| ATPase family AAA domain-containing protein 3             | <i>Atad3</i>   | 1.19 | Up   | 142077500   | 119810000   |
| ATPase inhibitor, mitochondrial                           | <i>Atpif1</i>  | 1.03 | Down | 240128000   | 247592500   |
| ATP-binding cassette sub-family A member 2                | <i>Abca2</i>   | 1.78 | Down | 888925000   | 1581000000  |
| ATP-binding cassette sub-family B member 7, mitochondrial | <i>Abcb7</i>   | 1.39 | Up   | 80542333.33 | 57938000    |
| ATP-binding cassette sub-family D member 3                | <i>Abcd3</i>   | 1.09 | Down | 114430000   | 124610000   |
| ATP-citrate synthase                                      | <i>Aclt</i>    | 1.02 | Down | 9529375000  | 9746000000  |
| ATP-dependent (S)-NAD(P)H-hydrate dehydratase             | <i>Carkd</i>   | 1.05 | Up   | 241316666.7 | 229980000   |
| ATP-dependent 6-phosphofructokinase, liver type           | <i>Pfkl</i>    | 1.04 | Up   | 16649500000 | 16062500000 |
| ATP-dependent 6-phosphofructokinase, muscle type          | <i>Pfkm</i>    | 1.07 | Down | 4322750000  | 4612725000  |
| ATP-dependent 6-phosphofructokinase, platelet type        | <i>Pfkp</i>    | 1.01 | Down | 3159375000  | 3205825000  |
| ATP-dependent DNA helicase Q1                             | <i>Recql</i>   | 1.36 | Down | 34025000    | 46233500    |
| ATP-dependent RNA helicase DDX1                           | <i>Ddx1</i>    | 1.00 | Up   | 4859825000  | 4848525000  |
| ATP-dependent RNA helicase SUPV3L1, mitochondrial         | <i>Supv3l1</i> | 1.25 | Up   | 124909000   | 99926500    |
| ATP-sensitive inward rectifier potassium channel 10       | <i>Kcnj10</i>  | 1.11 | Up   | 505680000   | 457280000   |
| BAG family molecular chaperone regulator 5                | <i>Bag5</i>    | 1.00 | Down | 145776666.7 | 146023333.3 |
| Band 4.1-like protein 1                                   | <i>Epb41l1</i> | 1.02 | Down | 1812350000  | 1847475000  |
| Band 4.1-like protein 5                                   | <i>Epb41l5</i> | 1.25 | Up   | 64173000    | 51371000    |
| Bardet-Biedl syndrome 2 protein homolog                   | <i>Bbs2</i>    | 1.13 | Up   | 123912666.7 | 109362333.3 |
| Basic leucine zipper and W2 domain-containing protein 1   | <i>Bzwl</i>    | 1.02 | Up   | 127570000   | 124643333.3 |

|                                                                                                                                                                                                                                 |                 |      |      |             |             |
|---------------------------------------------------------------------------------------------------------------------------------------------------------------------------------------------------------------------------------|-----------------|------|------|-------------|-------------|
| Basic leucine zipper and W2 domain-containing protein 2                                                                                                                                                                         | <i>Bztw2</i>    | 1.02 | Down | 419097500   | 428787500   |
| Basigin                                                                                                                                                                                                                         | <i>Bsg</i>      | 1.06 | Down | 3970000000  | 4193225000  |
| Beta-adducin                                                                                                                                                                                                                    | <i>Add2</i>     | 1.03 | Down | 436765000   | 451895000   |
| Beta-arrestin-1                                                                                                                                                                                                                 | <i>Arrb1</i>    | 2.07 | Up   | 595772500   | 288182500   |
| Beta-catenin-like protein 1                                                                                                                                                                                                     | <i>Ctnnbl1</i>  | 1.05 | Down | 204677500   | 214127500   |
| Beta-crystallin A3;Beta-crystallin A3, isoform A1, Delta4 form;Beta-crystallin A3, isoform A1, Delta7 form;Beta-crystallin A3, isoform A1, Delta8 form                                                                          | <i>Cryba1</i>   | 1.58 | Up   | 271492500   | 171631500   |
| Beta-crystallin A4                                                                                                                                                                                                              | <i>Cryba4</i>   | 3.39 | Up   | 85191750    | 25144500    |
| Beta-crystallin B2                                                                                                                                                                                                              | <i>Crybb2</i>   | 1.89 | Up   | 1062927500  | 561807500   |
| Beta-crystallin S                                                                                                                                                                                                               | <i>Crygs</i>    | 1.68 | Up   | 107755000   | 64106750    |
| Beta-lactamase-like protein 2                                                                                                                                                                                                   | <i>Lactb2</i>   | 1.14 | Up   | 101045750   | 88720500    |
| Beta-soluble NSF attachment protein                                                                                                                                                                                             | <i>Napb</i>     | 1.01 | Up   | 3149450000  | 3121925000  |
| Beta-synuclein                                                                                                                                                                                                                  | <i>Sncb</i>     | 1.16 | Down | 5375875000  | 6251275000  |
| Bifunctional ATP-dependent dihydroxyacetone kinase/FAD-AMP lyase (cyclizing);ATP-dependent dihydroxyacetone kinase/FAD-AMP lyase (cyclizing)                                                                                    | <i>Dak</i>      | 1.06 | Up   | 116835000   | 110307250   |
| Bifunctional purine biosynthesis protein PURH;Phosphoribosylaminoimidazolecarboxamide formyltransferase;IMP cyclohydrolase                                                                                                      | <i>Atic</i>     | 1.05 | Up   | 2317675000  | 2205125000  |
| Biliverdin reductase A                                                                                                                                                                                                          | <i>Blvra</i>    | 1.05 | Up   | 566887500   | 540447500   |
| Bis(5-adenosyl)-triphosphatase                                                                                                                                                                                                  | <i>Fhit</i>     | 1.14 | Down | 43029000    | 48936000    |
| Bis(5-nucleosyl)-tetrphosphatase [asymmetrical]                                                                                                                                                                                 | <i>Nudt2</i>    | 1.06 | Up   | 535497500   | 503367500   |
| Bleomycin hydrolase                                                                                                                                                                                                             | <i>Blmh</i>     | 1.23 | Down | 895977500   | 1105300000  |
| Brain acid soluble protein 1                                                                                                                                                                                                    | <i>Basp1</i>    | 1.42 | Up   | 542803333.3 | 382897500   |
| Branched-chain-amino-acid aminotransferase, cytosolic                                                                                                                                                                           | <i>Bcat1</i>    | 1.02 | Up   | 4813250000  | 4704575000  |
| Brefeldin A-inhibited guanine nucleotide-exchange protein 1                                                                                                                                                                     | <i>Arfgef1</i>  | 1.15 | Up   | 97820000    | 85315250    |
| Brefeldin A-inhibited guanine nucleotide-exchange protein 2                                                                                                                                                                     | <i>Arfgef2</i>  | 1.22 | Up   | 151195000   | 124415000   |
| C-1-tetrahydrofolate synthase, cytoplasmic;Methylenetetrahydrofolate dehydrogenase;Methenyltetrahydrofolate cyclohydrolase;Formyltetrahydrofolate synthetase;C-1-tetrahydrofolate synthase, cytoplasmic, N-terminally processed | <i>Mthfd1</i>   | 1.09 | Down | 510312500   | 556932500   |
| Cadherin-2                                                                                                                                                                                                                      | <i>Cdh2</i>     | 1.03 | Up   | 605437500   | 589670000   |
| Calbindin                                                                                                                                                                                                                       | <i>Calb1</i>    | 1.02 | Up   | 1007465000  | 983677500   |
| Calcium/calmodulin-dependent 3,5-cyclic nucleotide phosphodiesterase 1B                                                                                                                                                         | <i>Pde1b</i>    | 1.19 | Up   | 265570000   | 222352500   |
| Calcium/calmodulin-dependent protein kinase type 1                                                                                                                                                                              | <i>Camk1</i>    | 1.01 | Down | 182242500   | 184892500   |
| Calcium/calmodulin-dependent protein kinase type II subunit alpha                                                                                                                                                               | <i>Camk2a</i>   | 1.12 | Up   | 430585000   | 386097500   |
| Calcium/calmodulin-dependent protein kinase type II subunit beta                                                                                                                                                                | <i>Camk2b</i>   | 1.01 | Up   | 2813475000  | 2798000000  |
| Calcium/calmodulin-dependent protein kinase type II subunit delta                                                                                                                                                               | <i>Camk2d</i>   | 1.00 | Down | 8519400000  | 8553750000  |
| Calcium/calmodulin-dependent protein kinase type II subunit gamma                                                                                                                                                               | <i>Camk2g</i>   | 1.17 | Up   | 337736666.7 | 288540000   |
| Calcium/calmodulin-dependent protein kinase type IV                                                                                                                                                                             | <i>Camk4</i>    | 1.44 | Down | 30930000    | 44561750    |
| Calcium-binding mitochondrial carrier protein SCaMC-2                                                                                                                                                                           | <i>Slc25a25</i> | 1.56 | Up   | 108535333.3 | 69402000    |
| Calcium-binding protein 1                                                                                                                                                                                                       | <i>Cabp1</i>    | 1.37 | Down | 4665200     | 6370033.333 |
| Calcium-dependent secretion activator 1                                                                                                                                                                                         | <i>Cadps</i>    | 1.03 | Up   | 7112875000  | 6897350000  |
| Calcyclin-binding protein                                                                                                                                                                                                       | <i>Cacybp</i>   | 1.03 | Down | 1482100000  | 1521750000  |

|                                                                                                                                                     |                                |      |      |             |             |
|-----------------------------------------------------------------------------------------------------------------------------------------------------|--------------------------------|------|------|-------------|-------------|
| Calmodulin                                                                                                                                          | <i>Calm1</i>                   | 1.01 | Down | 3273650000  | 3316400000  |
| Calnexin                                                                                                                                            | <i>Canx</i>                    | 1.11 | Up   | 7445525000  | 6682475000  |
| Calpain small subunit 1                                                                                                                             | <i>Capns1</i>                  | 1.03 | Down | 286240000   | 295207500   |
| Calpain-2 catalytic subunit                                                                                                                         | <i>Capn2</i>                   | 1.07 | Up   | 602855000   | 562822500   |
| Calponin-3                                                                                                                                          | <i>Cnn3</i>                    | 1.04 | Down | 601487500   | 623987500   |
| Calreticulin                                                                                                                                        | <i>Calr</i>                    | 1.08 | Up   | 4982675000  | 4622875000  |
| Calretinin                                                                                                                                          | <i>Calb2</i>                   | 1.06 | Down | 18712750000 | 19831000000 |
| Calsyntenin-1;Soluble Alc-alpha;CTF1-alpha                                                                                                          | <i>Clstn1</i>                  | 1.25 | Up   | 68524000    | 54684500    |
| CaM kinase-like vesicle-associated protein                                                                                                          | <i>Camkv</i>                   | 1.05 | Up   | 2099625000  | 1995500000  |
| cAMP-dependent protein kinase catalytic subunit alpha                                                                                               | <i>Prkaca</i>                  | 1.04 | Up   | 728912500   | 701215000   |
| cAMP-dependent protein kinase catalytic subunit beta                                                                                                | <i>Prkacb</i>                  | 1.03 | Down | 2213500000  | 2270525000  |
| cAMP-dependent protein kinase type I-alpha regulatory subunit;cAMP-dependent protein kinase type I-alpha regulatory subunit, N-terminally processed | <i>Prkar1a</i>                 | 1.03 | Up   | 1200962500  | 1167400000  |
| cAMP-dependent protein kinase type I-beta regulatory subunit                                                                                        | <i>Prkar1b</i>                 | 1.37 | Down | 62355000    | 85529000    |
| cAMP-dependent protein kinase type II-alpha regulatory subunit                                                                                      | <i>Prkar2a</i>                 | 1.11 | Up   | 4322750000  | 3902850000  |
| cAMP-dependent protein kinase type II-beta regulatory subunit                                                                                       | <i>Prkar2b</i>                 | 1.05 | Up   | 934920000   | 888635000   |
| CAP-Gly domain-containing linker protein 2                                                                                                          | <i>Clip2</i>                   | 1.05 | Up   | 236885000   | 226520000   |
| Caprin-1                                                                                                                                            | <i>Caprin1</i>                 | 1.01 | Up   | 370625000   | 367505000   |
| Cap-specific mRNA (nucleoside-2-O-)-methyltransferase 1                                                                                             | <i>Cmtr1</i>                   | 1.05 | Up   | 150460000   | 142640000   |
| Carbonic anhydrase 1                                                                                                                                | <i>Ca1</i>                     | 1.10 | Down | 150765000   | 166310000   |
| Carbonic anhydrase 2                                                                                                                                | <i>Ca2</i>                     | 1.00 | Up   | 52683750000 | 52562000000 |
| Carbonic anhydrase-related protein                                                                                                                  | <i>Ca8</i>                     | 1.06 | Up   | 93837000    | 88660000    |
| Carbonyl reductase [NADPH] 1                                                                                                                        | <i>Cbr1</i>                    | 1.08 | Up   | 6000800000  | 5560425000  |
| Carboxymethylenebutenolidase homolog                                                                                                                | <i>Cmb1</i>                    | 1.12 | Up   | 109515000   | 97795000    |
| Carboxypeptidase E                                                                                                                                  | <i>Cpe</i>                     | 1.10 | Up   | 271400000   | 247690000   |
| Carnitine O-acetyltransferase                                                                                                                       | <i>Crat</i>                    | 1.04 | Up   | 145940000   | 140482500   |
| Carnitine O-palmitoyltransferase 1, liver isoform                                                                                                   | <i>Cpt1a</i>                   | 1.13 | Up   | 192722500   | 170445000   |
| Carnitine O-palmitoyltransferase 2, mitochondrial                                                                                                   | <i>Cpt2</i>                    | 1.11 | Up   | 1232327500  | 1107037500  |
| Casein kinase I isoform alpha                                                                                                                       | <i>Csnk1a1</i>                 | 1.17 | Down | 127685000   | 148825000   |
| Casein kinase I isoform delta                                                                                                                       | <i>Csnk1d</i>                  | 2.17 | Down | 10006000    | 21690000    |
| Casein kinase I isoform gamma-2;Casein kinase I isoform gamma-3;Casein kinase I isoform gamma-1                                                     | <i>Csnk1g2;Csnk1g3;Csnk1g1</i> | 1.40 | Up   | 116216666.7 | 83216333.33 |
| Casein kinase II subunit alpha                                                                                                                      | <i>Csnk2a1</i>                 | 1.01 | Down | 2880700000  | 2899725000  |
| Casein kinase II subunit beta                                                                                                                       | <i>Csnk2b</i>                  | 1.34 | Down | 902935000   | 1213875000  |
| Caskin-1                                                                                                                                            | <i>Caskin1</i>                 | 1.03 | Up   | 790285000   | 770755000   |
| Catalase                                                                                                                                            | <i>Cat</i>                     | 1.32 | Down | 206920000   | 272392500   |
| Catechol O-methyltransferase                                                                                                                        | <i>Comt</i>                    | 1.06 | Up   | 379535000   | 359157500   |
| Catenin beta-1                                                                                                                                      | <i>Ctnnb1</i>                  | 1.01 | Up   | 2928150000  | 2894900000  |
| Cathepsin B;Cathepsin B light chain;Cathepsin B heavy chain                                                                                         | <i>Ctsb</i>                    | 1.10 | Down | 694257500   | 765582500   |
| Cathepsin D;Cathepsin D 12 kDa light chain;Cathepsin D 9 kDa light chain;Cathepsin D 34 kDa heavy chain;Cathepsin D 30 kDa heavy chain              | <i>Ctsd</i>                    | 1.02 | Up   | 3606550000  | 3540900000  |
| Caveolin-1                                                                                                                                          | <i>Cav1</i>                    | 1.03 | Up   | 979492500   | 952035000   |
| CB1 cannabinoid receptor-interacting protein 1                                                                                                      | <i>Cnrip1</i>                  | 1.02 | Down | 1809275000  | 1851825000  |
| CD166 antigen                                                                                                                                       | <i>Alcam</i>                   | 1.18 | Up   | 287600000   | 243542500   |
| CD44 antigen                                                                                                                                        | <i>Cd44</i>                    | 1.14 | Up   | 1259900000  | 1103585000  |
| CD59 glycoprotein                                                                                                                                   | <i>Cd59</i>                    | 1.17 | Down | 479047500   | 560947500   |

|                                                                                            |                 |      |      |             |             |
|--------------------------------------------------------------------------------------------|-----------------|------|------|-------------|-------------|
| CD81 antigen                                                                               | <i>Cd81</i>     | 1.08 | Down | 529450000   | 573296666.7 |
| CD9 antigen                                                                                | <i>Cd9</i>      | 1.22 | Up   | 891910000   | 729085000   |
| CDGSH iron-sulfur domain-containing protein 1                                              | <i>Cisd1</i>    | 1.02 | Up   | 2465825000  | 2407000000  |
| CDK5 regulatory subunit-associated protein 3                                               | <i>Cdk5rap3</i> | 1.19 | Down | 92408500    | 109740000   |
| CDP-diacylglycerol--inositol 3-phosphatidyltransferase                                     | <i>Cdipt</i>    | 1.07 | Up   | 567880000   | 531367500   |
| Cell adhesion molecule 2                                                                   | <i>Cadm2</i>    | 1.05 | Up   | 1804225000  | 1721200000  |
| Cell adhesion molecule 3                                                                   | <i>Cadm3</i>    | 1.10 | Up   | 980950000   | 890287500   |
| Cell adhesion molecule 4                                                                   | <i>Cadm4</i>    | 1.10 | Up   | 123832250   | 112748500   |
| Cell cycle exit and neuronal differentiation protein 1                                     | <i>Cend1</i>    | 1.17 | Down | 140577333.3 | 164780000   |
| Cell division control protein 42 homolog                                                   | <i>Cdc42</i>    | 1.04 | Up   | 2110225000  | 2021000000  |
| Cell division cycle 5-like protein                                                         | <i>Cdc5l</i>    | 1.03 | Up   | 226080000   | 219477500   |
| Cell surface glycoprotein MUC18                                                            | <i>Mcam</i>     | 1.14 | Up   | 117760000   | 103295000   |
| Cellular nucleic acid-binding protein                                                      | <i>Cnbp</i>     | 1.54 | Down | 203021250   | 312617500   |
| Cellular retinoic acid-binding protein 1                                                   | <i>Crabp1</i>   | 1.06 | Down | 1966075000  | 2090525000  |
| Ceruloplasmin                                                                              | <i>Cp</i>       | 1.15 | Up   | 3074125000  | 2683400000  |
| cGMP-gated cation channel alpha-1                                                          | <i>Cnga1</i>    | 1.15 | Up   | 652675000   | 566775000   |
| cGMP-inhibited 3,5-cyclic phosphodiesterase A                                              | <i>Pde3a</i>    | 1.06 | Down | 92535250    | 97839500    |
| Chitinase domain-containing protein 1                                                      | <i>Chid1</i>    | 1.09 | Down | 167870000   | 182767500   |
| Chloride intracellular channel protein 1                                                   | <i>Clc1</i>     | 1.06 | Down | 562390000   | 593572500   |
| Chloride intracellular channel protein 4                                                   | <i>Clc4</i>     | 1.39 | Down | 95956000    | 133440000   |
| Chloride intracellular channel protein 6                                                   | <i>Clc6</i>     | 1.05 | Down | 93259000    | 97939000    |
| Choline dehydrogenase, mitochondrial                                                       | <i>Chdh</i>     | 1.21 | Down | 129197500   | 155720000   |
| Choline O-acetyltransferase                                                                | <i>Chat</i>     | 1.22 | Down | 104663666.7 | 127852500   |
| Choline transporter-like protein 2                                                         | <i>Slc44a2</i>  | 1.06 | Down | 289837500   | 308567500   |
| Choline/ethanolamine kinase                                                                | <i>Chkb</i>     | 1.02 | Up   | 180790000   | 176460000   |
| Chromodomain-helicase-DNA-binding protein 5                                                | <i>Chd5</i>     | 1.12 | Up   | 297210000   | 266305000   |
| Cilia- and flagella-associated protein 36                                                  | <i>Cfap36</i>   | 1.33 | Up   | 98955000    | 74481000    |
| Ciliary neurotrophic factor                                                                | <i>Cntf</i>     | 1.00 | Up   | 155580000   | 155373333.3 |
| Ciliary neurotrophic factor receptor subunit alpha                                         | <i>Cntfr</i>    | 1.27 | Up   | 245292500   | 193467500   |
| Citrate synthase, mitochondrial                                                            | <i>Cs</i>       | 1.08 | Down | 16584250000 | 17968500000 |
| Clathrin coat assembly protein AP180                                                       | <i>Snap91</i>   | 1.00 | Up   | 6890550000  | 6882075000  |
| Clathrin heavy chain 1                                                                     | <i>Cltc</i>     | 1.07 | Up   | 80309000000 | 75261500000 |
| Clathrin light chain A                                                                     | <i>Clta</i>     | 1.77 | Up   | 846083333.3 | 478195000   |
| Clathrin light chain B                                                                     | <i>Cltb</i>     | 1.11 | Up   | 601797500   | 544375000   |
| Cleavage and polyadenylation specificity factor subunit 5                                  | <i>Nudt21</i>   | 1.19 | Up   | 906427500   | 764075000   |
| Cleavage and polyadenylation specificity factor subunit 7                                  | <i>Cpsf7</i>    | 1.17 | Up   | 115658000   | 99227750    |
| Cleavage stimulation factor subunit 1                                                      | <i>Cstf1</i>    | 1.40 | Down | 49357000    | 68873000    |
| CLIP-associating protein 2                                                                 | <i>Clasp2</i>   | 1.06 | Down | 863222500   | 912397500   |
| Clusterin;Clusterin beta chain;Clusterin alpha chain                                       | <i>Clu</i>      | 1.91 | Up   | 189795000   | 99412500    |
| Coactosin-like protein                                                                     | <i>Cotl1</i>    | 1.04 | Up   | 1359675000  | 1305625000  |
| Coatomer subunit beta                                                                      | <i>Copb1</i>    | 1.06 | Up   | 1112777500  | 1051637500  |
| Coatomer subunit beta                                                                      | <i>Copb2</i>    | 1.01 | Down | 1691000000  | 1702775000  |
| Coatomer subunit delta                                                                     | <i>Arcn1</i>    | 1.08 | Down | 661377500   | 715052500   |
| Coatomer subunit gamma-1                                                                   | <i>Copg1</i>    | 1.01 | Down | 397395000   | 400800000   |
| Coatomer subunit gamma-2                                                                   | <i>Copg2</i>    | 1.05 | Up   | 557542500   | 530562500   |
| Cocaine- and amphetamine-regulated transcript protein;CART(1-52);CART(55-102);CART(62-102) | <i>Cartpt</i>   | 1.05 | Down | 159690500   | 167835000   |
| Cofilin-1                                                                                  | <i>Cfl1</i>     | 1.03 | Up   | 11618250000 | 11298750000 |
| Coiled-coil domain-containing protein 127                                                  | <i>Ccdc127</i>  | 1.31 | Up   | 9697200     | 7405500     |
| Coiled-coil domain-containing protein 47                                                   | <i>Ccdc47</i>   | 1.06 | Down | 150742500   | 160225000   |
| Coiled-coil domain-containing protein 51                                                   | <i>Ccdc51</i>   | 1.08 | Down | 151900000   | 164422500   |
| Coiled-coil domain-containing protein 93                                                   | <i>Ccdc93</i>   | 1.29 | Down | 42769000    | 55190666.67 |

|                                                                                                                                                                                                                                                                                                                                    |                |      |      |             |             |
|------------------------------------------------------------------------------------------------------------------------------------------------------------------------------------------------------------------------------------------------------------------------------------------------------------------------------------|----------------|------|------|-------------|-------------|
| Cold shock domain-containing protein E1                                                                                                                                                                                                                                                                                            | <i>Csde1</i>   | 1.22 | Down | 115406250   | 141222500   |
| Cold-inducible RNA-binding protein                                                                                                                                                                                                                                                                                                 | <i>Cirbp</i>   | 1.06 | Down | 1392280000  | 1473225000  |
| Complement C3;Complement C3 beta chain;C3-beta-c;Complement C3 alpha chain;C3a anaphylatoxin;Acylation stimulating protein;Complement C3b alpha chain;Complement C3c alpha chain fragment 1;Complement C3dg fragment;Complement C3g fragment;Complement C3d fragment;Complement C3f fragment;Complement C3c alpha chain fragment 2 | <i>C3</i>      | 1.11 | Down | 478977500   | 532495000   |
| Complement component 1 Q subcomponent-binding protein, mitochondrial                                                                                                                                                                                                                                                               | <i>C1qbp</i>   | 1.14 | Down | 847745000   | 966745000   |
| Complement component receptor 1-like protein                                                                                                                                                                                                                                                                                       | <i>Cr1l</i>    | 1.07 | Down | 106438250   | 113722750   |
| Contactin-1                                                                                                                                                                                                                                                                                                                        | <i>Cntn1</i>   | 1.10 | Down | 2068550000  | 2279975000  |
| Contactin-associated protein 1                                                                                                                                                                                                                                                                                                     | <i>Cntnap1</i> | 1.19 | Up   | 221666666.7 | 187025000   |
| COP9 signalosome complex subunit 1                                                                                                                                                                                                                                                                                                 | <i>Gps1</i>    | 1.04 | Down | 944920000   | 985872500   |
| COP9 signalosome complex subunit 2                                                                                                                                                                                                                                                                                                 | <i>Cops2</i>   | 1.08 | Up   | 1188605000  | 1100715000  |
| COP9 signalosome complex subunit 3                                                                                                                                                                                                                                                                                                 | <i>Cops3</i>   | 1.01 | Down | 846855000   | 853530000   |
| COP9 signalosome complex subunit 4                                                                                                                                                                                                                                                                                                 | <i>Cops4</i>   | 1.08 | Up   | 1805575000  | 1665375000  |
| COP9 signalosome complex subunit 8                                                                                                                                                                                                                                                                                                 | <i>Cops8</i>   | 1.11 | Down | 302740000   | 336912500   |
| Copine-9                                                                                                                                                                                                                                                                                                                           | <i>Cpne9</i>   | 1.12 | Up   | 387710000   | 344850000   |
| Copper chaperone for superoxide dismutase                                                                                                                                                                                                                                                                                          | <i>Ccs</i>     | 1.21 | Down | 152756666.7 | 184712500   |
| Copper transport protein ATOX1                                                                                                                                                                                                                                                                                                     | <i>Atox1</i>   | 1.01 | Down | 309475000   | 313915000   |
| Coronin-1B                                                                                                                                                                                                                                                                                                                         | <i>Coro1b</i>  | 1.05 | Down | 623502500   | 656140000   |
| Coronin-7                                                                                                                                                                                                                                                                                                                          | <i>Coro7</i>   | 1.09 | Down | 136747500   | 149445000   |
| Craniofacial development protein 1                                                                                                                                                                                                                                                                                                 | <i>Cfdp1</i>   | 1.05 | Up   | 105670000   | 101062000   |
| Creatine kinase B-type                                                                                                                                                                                                                                                                                                             | <i>Ckb</i>     | 1.00 | Up   | 92798000000 | 92772500000 |
| Creatine kinase M-type                                                                                                                                                                                                                                                                                                             | <i>Ckm</i>     | 1.70 | Up   | 641130000   | 377383333.3 |
| Creatine kinase U-type, mitochondrial                                                                                                                                                                                                                                                                                              | <i>Ckmt1</i>   | 1.05 | Up   | 9006550000  | 8593375000  |
| Crooked neck-like protein 1                                                                                                                                                                                                                                                                                                        | <i>Crnkl1</i>  | 1.10 | Up   | 1095000000  | 998220000   |
| C-terminal-binding protein 1                                                                                                                                                                                                                                                                                                       | <i>Ctbp1</i>   | 1.03 | Up   | 1470275000  | 1426175000  |
| C-terminal-binding protein 2                                                                                                                                                                                                                                                                                                       | <i>Ctbp2</i>   | 1.22 | Up   | 926720000   | 759195000   |
| CTP synthase 2                                                                                                                                                                                                                                                                                                                     | <i>Ctps2</i>   | 1.03 | Down | 85330666.67 | 88178000    |
| CUGBP Elav-like family member 1                                                                                                                                                                                                                                                                                                    | <i>Celf1</i>   | 1.11 | Up   | 171331500   | 154957500   |
| CUGBP Elav-like family member 2                                                                                                                                                                                                                                                                                                    | <i>Celf2</i>   | 1.11 | Up   | 1238950000  | 1120375000  |
| Cullin-3                                                                                                                                                                                                                                                                                                                           | <i>Cul3</i>    | 1.07 | Down | 1024205000  | 1098125000  |
| Cullin-5                                                                                                                                                                                                                                                                                                                           | <i>Cul5</i>    | 1.06 | Down | 611385000   | 648687500   |
| Cullin-associated NEDD8-dissociated protein 1                                                                                                                                                                                                                                                                                      | <i>Cand1</i>   | 1.07 | Up   | 10681500000 | 9965400000  |
| Cyclin-dependent kinase 17                                                                                                                                                                                                                                                                                                         | <i>Cdk17</i>   | 1.48 | Up   | 33591000    | 22647000    |
| Cyclin-dependent-like kinase 5                                                                                                                                                                                                                                                                                                     | <i>Cdk5</i>    | 1.09 | Down | 717620000   | 779000000   |
| Cyclin-G-associated kinase                                                                                                                                                                                                                                                                                                         | <i>Gak</i>     | 1.33 | Up   | 275375000   | 207670000   |
| Cystatin-B                                                                                                                                                                                                                                                                                                                         | <i>Cstb</i>    | 1.08 | Up   | 654907500   | 608227500   |
| Cysteine and glycine-rich protein 1                                                                                                                                                                                                                                                                                                | <i>Csrp1</i>   | 1.13 | Up   | 494517500   | 439120000   |
| Cysteine and glycine-rich protein 2                                                                                                                                                                                                                                                                                                | <i>Csrp2</i>   | 1.03 | Up   | 63305000    | 61370000    |
| Cysteine and histidine-rich domain-containing protein 1                                                                                                                                                                                                                                                                            | <i>Chordc1</i> | 1.17 | Up   | 106470000   | 91174500    |
| Cysteine desulfurase, mitochondrial                                                                                                                                                                                                                                                                                                | <i>Nfs1</i>    | 1.39 | Down | 112246666.7 | 155570000   |
| Cysteine sulfinic acid decarboxylase                                                                                                                                                                                                                                                                                               | <i>Csad</i>    | 1.08 | Down | 337890000   | 364720000   |
| Cysteine-rich protein 2                                                                                                                                                                                                                                                                                                            | <i>Crip2</i>   | 1.10 | Down | 813660000   | 893795000   |
| Cysteine-rich with EGF-like domain protein 1                                                                                                                                                                                                                                                                                       | <i>Creld1</i>  | 1.07 | Down | 53613000    | 57212500    |
| Cytochrome b                                                                                                                                                                                                                                                                                                                       | <i>Mt-Cyb</i>  | 1.24 | Up   | 139770000   | 113110000   |
| Cytochrome b5                                                                                                                                                                                                                                                                                                                      | <i>Cyb5a</i>   | 1.01 | Down | 215947500   | 217137500   |
| Cytochrome b5 type B                                                                                                                                                                                                                                                                                                               | <i>Cyb5b</i>   | 1.02 | Down | 609345000   | 621447500   |
| Cytochrome b-c1 complex subunit 1, mitochondrial                                                                                                                                                                                                                                                                                   | <i>Uqcrc1</i>  | 1.05 | Up   | 4884900000  | 4670950000  |

|                                                                                                                  |                 |      |      |             |             |
|------------------------------------------------------------------------------------------------------------------|-----------------|------|------|-------------|-------------|
| Cytochrome b-c1 complex subunit 2, mitochondrial                                                                 | <i>Uqcrc2</i>   | 1.01 | Down | 10668550000 | 10728775000 |
| Cytochrome b-c1 complex subunit 6, mitochondrial                                                                 | <i>Uqcrh</i>    | 1.07 | Up   | 361790000   | 338215000   |
| Cytochrome b-c1 complex subunit 8                                                                                | <i>Uqcrq</i>    | 1.04 | Up   | 1463900000  | 1406275000  |
| Cytochrome b-c1 complex subunit Rieske, mitochondrial;Cytochrome b-c1 complex subunit 11                         | <i>Uqcrfs1</i>  | 1.06 | Down | 1416550000  | 1503875000  |
| Cytochrome c oxidase subunit 1                                                                                   | <i>Mtco1</i>    | 1.29 | Up   | 542560000   | 420583333.3 |
| Cytochrome c oxidase subunit 2                                                                                   | <i>Mtco2</i>    | 1.06 | Up   | 4976925000  | 4712325000  |
| Cytochrome c oxidase subunit 3                                                                                   | <i>Mtco3</i>    | 1.18 | Up   | 151855333.3 | 129183500   |
| Cytochrome c oxidase subunit 4 isoform 1, mitochondrial                                                          | <i>Cox4i1</i>   | 1.30 | Down | 5322275000  | 6912550000  |
| Cytochrome c oxidase subunit 4 isoform 2, mitochondrial                                                          | <i>Cox4i2</i>   | 1.26 | Up   | 348440000   | 275582500   |
| Cytochrome c oxidase subunit 5A, mitochondrial                                                                   | <i>Cox5a</i>    | 1.02 | Down | 4050500000  | 4145125000  |
| Cytochrome c oxidase subunit 5B, mitochondrial                                                                   | <i>Cox5b</i>    | 1.00 | Up   | 1596275000  | 1593275000  |
| Cytochrome c oxidase subunit 6A1, mitochondrial                                                                  | <i>Cox6a1</i>   | 1.02 | Up   | 927206666.7 | 905800000   |
| Cytochrome c oxidase subunit 6C-2                                                                                | <i>Cox6c2</i>   | 1.22 | Down | 1671875000  | 2035775000  |
| Cytochrome c oxidase subunit 7A2, mitochondrial                                                                  | <i>Cox7a2</i>   | 1.18 | Up   | 580072500   | 492022500   |
| Cytochrome c, somatic                                                                                            | <i>Cycs</i>     | 1.07 | Up   | 5842925000  | 5455900000  |
| Cytoglobin                                                                                                       | <i>Cygb</i>     | 1.09 | Down | 1207050000  | 1309950000  |
| Cytoplasmic aconitate hydratase                                                                                  | <i>Aco1</i>     | 1.06 | Up   | 1634425000  | 1542725000  |
| Cytoplasmic dynein 1 heavy chain 1                                                                               | <i>Dync1h1</i>  | 1.07 | Up   | 34955250000 | 32685750000 |
| Cytoplasmic dynein 1 intermediate chain 1                                                                        | <i>Dync1i1</i>  | 1.37 | Up   | 132340000   | 96435500    |
| Cytoplasmic dynein 1 intermediate chain 2                                                                        | <i>Dync1i2</i>  | 1.12 | Up   | 465702500   | 414400000   |
| Cytoplasmic dynein 1 light intermediate chain 1                                                                  | <i>Dync1li1</i> | 1.13 | Down | 1065242500  | 1203450000  |
| Cytoplasmic dynein 1 light intermediate chain 2                                                                  | <i>Dync1li2</i> | 1.10 | Down | 242553500   | 267887500   |
| Cytoplasmic dynein 2 heavy chain 1                                                                               | <i>Dync2h1</i>  | 1.47 | Down | 132841500   | 195246666.7 |
| Cytosol aminopeptidase                                                                                           | <i>Lap3</i>     | 1.12 | Up   | 2099200000  | 1873325000  |
| Cytosolic acyl coenzyme A thioester hydrolase                                                                    | <i>Acot7</i>    | 1.02 | Down | 2055200000  | 2095475000  |
| Cytosolic non-specific dipeptidase                                                                               | <i>Cndp2</i>    | 1.21 | Down | 1931625000  | 2346150000  |
| D-3-phosphoglycerate dehydrogenase                                                                               | <i>Phgdh</i>    | 1.19 | Up   | 643742500   | 539642500   |
| D-beta-hydroxybutyrate dehydrogenase, mitochondrial                                                              | <i>Bdh1</i>     | 1.10 | Up   | 599750000   | 546857500   |
| DDB1- and CUL4-associated factor 8                                                                               | <i>Dcaf8</i>    | 1.09 | Up   | 75405000    | 69174666.67 |
| D-dopachrome decarboxylase                                                                                       | <i>Ddt</i>      | 1.09 | Down | 2498975000  | 2716750000  |
| Delta(3,5)-Delta(2,4)-dienoyl-CoA isomerase, mitochondrial                                                       | <i>Ech1</i>     | 1.20 | Up   | 153865000   | 127990000   |
| Delta-1-pyrroline-5-carboxylate dehydrogenase, mitochondrial                                                     | <i>Aldh4a1</i>  | 1.11 | Down | 648040000   | 716342500   |
| Delta-aminolevulinic acid dehydratase                                                                            | <i>Alad</i>     | 1.13 | Up   | 362032500   | 320477500   |
| Deoxyhypusine synthase                                                                                           | <i>Dhps</i>     | 1.41 | Up   | 61238500    | 43553000    |
| Dephospho-CoA kinase domain-containing protein                                                                   | <i>Dcakd</i>    | 1.30 | Down | 21367000    | 27695500    |
| Destrin                                                                                                          | <i>Dstn</i>     | 1.14 | Up   | 2849375000  | 2506300000  |
| Deubiquitinating protein VCIP135                                                                                 | <i>Vcpip1</i>   | 1.25 | Down | 87165000    | 108924250   |
| Diacylglycerol kinase zeta                                                                                       | <i>Dgkz</i>     | 1.08 | Up   | 45510500    | 42246500    |
| Dihydrolipoyl dehydrogenase, mitochondrial                                                                       | <i>Dld</i>      | 1.03 | Up   | 4284775000  | 4156875000  |
| Dihydrolipoyllysine-residue acetyltransferase component of pyruvate dehydrogenase complex, mitochondrial         | <i>Dlat</i>     | 1.09 | Up   | 5067750000  | 4630450000  |
| Dihydrolipoyllysine-residue succinyltransferase component of 2-oxoglutarate dehydrogenase complex, mitochondrial | <i>Dlst</i>     | 1.04 | Up   | 1628725000  | 1569525000  |

|                                                                                                    |                 |      |      |             |             |
|----------------------------------------------------------------------------------------------------|-----------------|------|------|-------------|-------------|
| Dihydropteridine reductase                                                                         | <i>Qdpr</i>     | 1.08 | Down | 1921250000  | 2072125000  |
| Dihydropyrimidinase-related protein 1                                                              | <i>Crmp1</i>    | 1.02 | Down | 9807025000  | 9972525000  |
| Dihydropyrimidinase-related protein 2                                                              | <i>Dpysl2</i>   | 1.01 | Up   | 68687250000 | 68087250000 |
| Dihydropyrimidinase-related protein 3                                                              | <i>Dpysl3</i>   | 1.01 | Up   | 8753425000  | 8670625000  |
| Dihydropyrimidinase-related protein 4                                                              | <i>Dpysl4</i>   | 1.02 | Up   | 19762500000 | 19328750000 |
| Dihydropyrimidinase-related protein 5                                                              | <i>Dpysl5</i>   | 1.01 | Down | 10870950000 | 10985575000 |
| Dipeptidyl aminopeptidase-like protein 6                                                           | <i>Dpp6</i>     | 1.17 | Down | 635902500   | 745355000   |
| Dipeptidyl peptidase 3                                                                             | <i>Dpp3</i>     | 1.06 | Up   | 718152500   | 680207500   |
| Diphosphoinositol polyphosphate phosphohydrolase 1                                                 | <i>Nudt3</i>    | 1.28 | Down | 273140000   | 350660000   |
| Diphosphoinositol polyphosphate phosphohydrolase 2                                                 | <i>Nudt4</i>    | 1.51 | Up   | 59385000    | 39292000    |
| Diphosphomevalonate decarboxylase                                                                  | <i>Mvd</i>      | 1.03 | Up   | 133126666.7 | 129473333.3 |
| Disabled homolog 2-interacting protein                                                             | <i>Dab2ip</i>   | 1.16 | Up   | 113310000   | 97827250    |
| Disks large homolog 1                                                                              | <i>Dlg1</i>     | 1.26 | Up   | 226430000   | 179730000   |
| Disks large homolog 2                                                                              | <i>Dlg2</i>     | 1.04 | Up   | 2162450000  | 2087700000  |
| Disks large homolog 3                                                                              | <i>Dlg3</i>     | 1.19 | Up   | 99968000    | 83712000    |
| Disks large homolog 4                                                                              | <i>Dlg4</i>     | 1.07 | Up   | 1278925000  | 1195350000  |
| DNA damage-binding protein 1                                                                       | <i>Ddb1</i>     | 1.03 | Up   | 3115475000  | 3031200000  |
| DNA repair protein XRCC1                                                                           | <i>Xrcc1</i>    | 1.15 | Up   | 25060000    | 21846000    |
| DNA topoisomerase 1                                                                                | <i>Top1</i>     | 1.52 | Up   | 57442000    | 37900000    |
| DNA topoisomerase 2-alpha                                                                          | <i>Top2a</i>    | 1.81 | Up   | 152155000   | 83870333.33 |
| DNA-(apurinic or apyrimidinic site) lyase;DNA-(apurinic or apyrimidinic site) lyase, mitochondrial | <i>Apex1</i>    | 1.03 | Down | 1779650000  | 1826375000  |
| DnaJ homolog subfamily A member 1                                                                  | <i>Dnaja1</i>   | 1.06 | Up   | 587180000   | 553777500   |
| DnaJ homolog subfamily A member 2                                                                  | <i>Dnaja2</i>   | 1.13 | Down | 848457500   | 959552500   |
| DnaJ homolog subfamily B member 11                                                                 | <i>Dnajib11</i> | 1.23 | Down | 266510000   | 328356666.7 |
| DnaJ homolog subfamily C member 5                                                                  | <i>Dnajc5</i>   | 1.06 | Down | 2786875000  | 2947525000  |
| DnaJ homolog subfamily C member 8                                                                  | <i>Dnajc8</i>   | 1.41 | Down | 234242500   | 330770000   |
| Dolichyl-diphosphooligosaccharide--protein glycosyltransferase 48 kDa subunit                      | <i>Ddost</i>    | 1.15 | Up   | 1128070000  | 976770000   |
| Dolichyl-diphosphooligosaccharide--protein glycosyltransferase subunit 1                           | <i>Rpn1</i>     | 1.06 | Up   | 2247975000  | 2120925000  |
| Dolichyl-diphosphooligosaccharide--protein glycosyltransferase subunit 2                           | <i>Rpn2</i>     | 1.01 | Up   | 1059145000  | 1047920000  |
| Drebrin                                                                                            | <i>Dbn1</i>     | 1.38 | Down | 508357500   | 699162500   |
| Drebrin-like protein                                                                               | <i>Dbnl</i>     | 1.06 | Down | 381267500   | 402685000   |
| Dual specificity mitogen-activated protein kinase kinase 1                                         | <i>Map2k1</i>   | 1.06 | Down | 1030570000  | 1090725000  |
| Dual specificity mitogen-activated protein kinase kinase 2                                         | <i>Map2k2</i>   | 1.09 | Down | 263075000   | 286335000   |
| Dual specificity tyrosine-phosphorylation-regulated kinase 1A                                      | <i>Dyrk1a</i>   | 1.60 | Down | 74864000    | 119740000   |
| Dynactin subunit 1                                                                                 | <i>Dctn1</i>    | 1.03 | Up   | 2989975000  | 2898725000  |
| Dynactin subunit 2                                                                                 | <i>Dctn2</i>    | 1.01 | Down | 3579775000  | 3616050000  |
| Dynactin subunit 4                                                                                 | <i>Dctn4</i>    | 1.16 | Up   | 528265000   | 453982500   |
| Dynamamin-1                                                                                        | <i>Dnm1</i>     | 1.04 | Up   | 20937750000 | 20104000000 |
| Dynamamin-1-like protein                                                                           | <i>Dnm1l</i>    | 1.06 | Up   | 3076200000  | 2891225000  |
| Dynamamin-2                                                                                        | <i>Dnm2</i>     | 1.22 | Up   | 1169297500  | 955762500   |
| Dynamamin-3                                                                                        | <i>Dnm3</i>     | 1.07 | Up   | 1858275000  | 1744125000  |
| Dynamamin-like 120 kDa protein, mitochondrial;Dynamamin-like 120 kDa protein, form S1              | <i>Opa1</i>     | 1.03 | Up   | 1278050000  | 1243450000  |
| Dynein light chain 2, cytoplasmic                                                                  | <i>Dynll2</i>   | 1.05 | Up   | 3022000000  | 2874600000  |
| Dynein light chain roadblock-type 1                                                                | <i>Dynlrb1</i>  | 1.17 | Down | 402870000   | 469890000   |
| Dystrophin                                                                                         | <i>Dmd</i>      | 1.36 | Up   | 330260000   | 243010000   |
| E3 ubiquitin-protein ligase BRE1B                                                                  | <i>Rnf40</i>    | 1.03 | Up   | 107166666.7 | 103698000   |
| E3 ubiquitin-protein ligase NEDD4                                                                  | <i>Nedd4</i>    | 1.05 | Down | 1102540000  | 1159150000  |
| E3 ubiquitin-protein ligase RNF123                                                                 | <i>Rnf123</i>   | 1.09 | Up   | 65552000    | 60024000    |
| E3 ubiquitin-protein ligase UBR4                                                                   | <i>Ubr4</i>     | 1.17 | Down | 353000000   | 411497500   |
| E3 UFM1-protein ligase 1                                                                           | <i>Ufl1</i>     | 1.10 | Up   | 97281000    | 88604666.67 |

|                                                                                                 |                    |      |      |             |             |
|-------------------------------------------------------------------------------------------------|--------------------|------|------|-------------|-------------|
| Echinoderm microtubule-associated protein-like 1                                                | <i>Eml1</i>        | 1.03 | Down | 74647000    | 77119000    |
| Echinoderm microtubule-associated protein-like 2                                                | <i>Eml2</i>        | 1.06 | Down | 284425000   | 302717500   |
| Ectonucleoside triphosphate diphosphohydrolase 2                                                | <i>Entpd2</i>      | 1.32 | Down | 30518000    | 40215666.67 |
| Ectonucleotide pyrophosphatase/phosphodiesterase family member 5                                | <i>Enpp5</i>       | 1.21 | Up   | 221680000   | 183565000   |
| EF-hand domain-containing protein D2                                                            | <i>Efh2</i>        | 1.09 | Down | 557167500   | 605327500   |
| EH domain-containing protein 1                                                                  | <i>Ehd1</i>        | 1.02 | Up   | 1676475000  | 1640625000  |
| EH domain-containing protein 3                                                                  | <i>Ehd3</i>        | 1.09 | Down | 466940000   | 509670000   |
| ELAV-like protein 4                                                                             | <i>Elavl4</i>      | 1.30 | Down | 293995000   | 382092500   |
| Electron transfer flavoprotein subunit alpha, mitochondrial                                     | <i>Etf1a</i>       | 1.03 | Up   | 1752150000  | 1697900000  |
| Electron transfer flavoprotein subunit beta                                                     | <i>Etf1b</i>       | 1.08 | Up   | 721117500   | 664887500   |
| Electron transfer flavoprotein-ubiquinone oxidoreductase, mitochondrial                         | <i>Etf1dh</i>      | 1.66 | Up   | 133353333.3 | 80505000    |
| Elongation factor 1-alpha 1                                                                     | <i>Eef1a1</i>      | 1.01 | Down | 30600000000 | 30839750000 |
| Elongation factor 1-alpha 2                                                                     | <i>Eef1a2</i>      | 1.07 | Up   | 4201575000  | 3934950000  |
| Elongation factor 1-delta                                                                       | <i>Eef1d</i>       | 1.08 | Down | 1107050000  | 1195900000  |
| Elongation factor 1-gamma                                                                       | <i>Eef1g</i>       | 1.05 | Up   | 4511200000  | 4291800000  |
| Elongation factor 2                                                                             | <i>Eef2</i>        | 1.01 | Down | 10288150000 | 10419325000 |
| Elongation factor Tu, mitochondrial                                                             | <i>Tufm</i>        | 1.05 | Up   | 4241075000  | 4020275000  |
| Elongator complex protein 1                                                                     | <i>Ikbkap</i>      | 1.10 | Up   | 980387500   | 887767500   |
| Elongator complex protein 2                                                                     | <i>Elp2</i>        | 1.03 | Down | 212246666.7 | 217995000   |
| Embigin                                                                                         | <i>Emb</i>         | 1.11 | Down | 191885000   | 212682500   |
| Endophilin-A1                                                                                   | <i>Sh3gl2</i>      | 1.03 | Up   | 4931150000  | 4791525000  |
| Endophilin-A2                                                                                   | <i>Sh3gl1</i>      | 1.04 | Up   | 151630000   | 146410000   |
| Endophilin-B1                                                                                   | <i>Sh3glb1</i>     | 1.02 | Down | 131373333.3 | 133939500   |
| Endophilin-B2                                                                                   | <i>Sh3glb2</i>     | 1.01 | Up   | 508257500   | 502560000   |
| Endoplasmic reticulum resident protein 29                                                       | <i>Erp29</i>       | 1.03 | Up   | 621775000   | 602942500   |
| Endoplasmin                                                                                     | <i>Hsp90b1</i>     | 1.05 | Up   | 6463950000  | 6165925000  |
| Endothelial differentiation-related factor 1                                                    | <i>Edf1</i>        | 1.08 | Down | 210013333.3 | 227110000   |
| Enhancer of mRNA-decapping protein 4                                                            | <i>Edc4</i>        | 1.01 | Down | 140307000   | 141517500   |
| Enolase-phosphatase E1                                                                          | <i>Enoph1</i>      | 1.03 | Down | 314462500   | 323360000   |
| Enoyl-CoA delta isomerase 1, mitochondrial                                                      | <i>Eci1</i>        | 1.01 | Down | 837167500   | 848575000   |
| Enoyl-CoA delta isomerase 2, mitochondrial                                                      | <i>Eci2</i>        | 1.03 | Down | 164162500   | 169200000   |
| Enoyl-CoA hydratase, mitochondrial                                                              | <i>Echs1</i>       | 1.01 | Down | 1292200000  | 1308550000  |
| Ephrin type-B receptor 1;Ephrin type-A receptor 6                                               | <i>Ephb1;Epha6</i> | 1.38 | Up   | 243163333.3 | 176490000   |
| Epsin-1                                                                                         | <i>Epn1</i>        | 1.05 | Up   | 360197500   | 341900000   |
| ER membrane protein complex subunit 2                                                           | <i>Emc2</i>        | 1.17 | Down | 208270000   | 243205000   |
| ER membrane protein complex subunit 3                                                           | <i>Emc3</i>        | 1.15 | Up   | 130300000   | 113208333.3 |
| ER membrane protein complex subunit 8                                                           | <i>Emc8</i>        | 1.27 | Up   | 271150000   | 213530000   |
| Erlin-2                                                                                         | <i>Erlin2</i>      | 1.04 | Up   | 1866125000  | 1800400000  |
| ERO1-like protein alpha                                                                         | <i>Ero1l</i>       | 1.16 | Down | 155325000   | 180886666.7 |
| ES1 protein homolog, mitochondrial                                                              | <i>C21orf33</i>    | 1.01 | Up   | 2076875000  | 2066175000  |
| Ester hydrolase C11orf54 homolog                                                                | <i>N/A</i>         | 1.47 | Down | 371655000   | 546245000   |
| Estradiol 17-beta-dehydrogenase 8                                                               | <i>Hsd17b8</i>     | 1.16 | Down | 40091000    | 46445666.67 |
| Ethanolamine-phosphate cytidylyltransferase                                                     | <i>Pcyt2</i>       | 1.02 | Up   | 117134750   | 115013500   |
| Ethylmalonyl-CoA decarboxylase                                                                  | <i>Echdc1</i>      | 1.28 | Up   | 175870000   | 137840000   |
| Eukaryotic initiation factor 4A-II;Eukaryotic initiation factor 4A-II, N-terminally processed   | <i>Eif4a2</i>      | 1.00 | Down | 6176475000  | 6200725000  |
| Eukaryotic initiation factor 4A-III;Eukaryotic initiation factor 4A-III, N-terminally processed | <i>Eif4a3</i>      | 1.14 | Down | 1543950000  | 1766300000  |
| Eukaryotic peptide chain release factor subunit 1                                               | <i>Etf1</i>        | 1.06 | Up   | 121140000   | 114486666.7 |

|                                                                                                                                                                                                                                                                                                                                 |                    |      |      |             |             |
|---------------------------------------------------------------------------------------------------------------------------------------------------------------------------------------------------------------------------------------------------------------------------------------------------------------------------------|--------------------|------|------|-------------|-------------|
| Eukaryotic translation initiation factor 1A                                                                                                                                                                                                                                                                                     | <i>Eif1a</i>       | 1.67 | Up   | 102425500   | 61270000    |
| Eukaryotic translation initiation factor 2 subunit 1                                                                                                                                                                                                                                                                            | <i>Eif2s1</i>      | 1.02 | Down | 565380000   | 574070000   |
| Eukaryotic translation initiation factor 2 subunit 3                                                                                                                                                                                                                                                                            | <i>Eif2s3</i>      | 1.13 | Down | 853010000   | 960195000   |
| Eukaryotic translation initiation factor 3 subunit A                                                                                                                                                                                                                                                                            | <i>Eif3a</i>       | 1.07 | Up   | 1370625000  | 1283300000  |
| Eukaryotic translation initiation factor 3 subunit B                                                                                                                                                                                                                                                                            | <i>Eif3b</i>       | 1.00 | Down | 569387500   | 570860000   |
| Eukaryotic translation initiation factor 3 subunit C                                                                                                                                                                                                                                                                            | <i>Eif3c</i>       | 1.04 | Down | 742740000   | 774672500   |
| Eukaryotic translation initiation factor 3 subunit D                                                                                                                                                                                                                                                                            | <i>Eif3d</i>       | 1.35 | Up   | 411957500   | 304757500   |
| Eukaryotic translation initiation factor 3 subunit E                                                                                                                                                                                                                                                                            | <i>Eif3e</i>       | 1.06 | Up   | 567937500   | 537272500   |
| Eukaryotic translation initiation factor 3 subunit G                                                                                                                                                                                                                                                                            | <i>Eif3g</i>       | 1.12 | Up   | 202360000   | 181340000   |
| Eukaryotic translation initiation factor 3 subunit H                                                                                                                                                                                                                                                                            | <i>Eif3h</i>       | 1.10 | Down | 185925000   | 205422500   |
| Eukaryotic translation initiation factor 3 subunit I                                                                                                                                                                                                                                                                            | <i>Eif3i</i>       | 1.05 | Up   | 432502500   | 412465000   |
| Eukaryotic translation initiation factor 4E                                                                                                                                                                                                                                                                                     | <i>Eif4e</i>       | 1.01 | Up   | 570132500   | 563075000   |
| Eukaryotic translation initiation factor 4H                                                                                                                                                                                                                                                                                     | <i>Eif4h</i>       | 1.32 | Down | 586937500   | 776885000   |
| Eukaryotic translation initiation factor 5                                                                                                                                                                                                                                                                                      | <i>Eif5</i>        | 1.03 | Up   | 269870000   | 261230000   |
| Eukaryotic translation initiation factor 5A-1                                                                                                                                                                                                                                                                                   | <i>Eif5a</i>       | 1.06 | Up   | 1855425000  | 1743200000  |
| Eukaryotic translation initiation factor 6                                                                                                                                                                                                                                                                                      | <i>Eif6</i>        | 1.04 | Down | 188422500   | 195895000   |
| Excitatory amino acid transporter 1                                                                                                                                                                                                                                                                                             | <i>Slc1a3</i>      | 1.02 | Up   | 5637925000  | 5547800000  |
| Exocyst complex component 2                                                                                                                                                                                                                                                                                                     | <i>Exoc2</i>       | 1.06 | Down | 69918000    | 74023500    |
| Exportin-1                                                                                                                                                                                                                                                                                                                      | <i>Xpo1</i>        | 1.10 | Up   | 3587775000  | 3271650000  |
| Extended synaptotagmin-1                                                                                                                                                                                                                                                                                                        | <i>Esyf1</i>       | 1.02 | Up   | 129497500   | 126890000   |
| Ezrin                                                                                                                                                                                                                                                                                                                           | <i>Ezr</i>         | 1.28 | Down | 558290000   | 716712500   |
| F-actin-capping protein subunit alpha-1                                                                                                                                                                                                                                                                                         | <i>Capza1</i>      | 1.09 | Up   | 385023333.3 | 353942500   |
| F-actin-capping protein subunit alpha-2                                                                                                                                                                                                                                                                                         | <i>Capza2</i>      | 1.07 | Down | 1644400000  | 1757475000  |
| F-actin-capping protein subunit beta                                                                                                                                                                                                                                                                                            | <i>Capzb</i>       | 1.26 | Down | 2110025000  | 2663500000  |
| Far upstream element-binding protein 1                                                                                                                                                                                                                                                                                          | <i>Fubp1</i>       | 1.09 | Down | 1201522500  | 1311100000  |
| Far upstream element-binding protein 2                                                                                                                                                                                                                                                                                          | <i>Khsrp</i>       | 1.11 | Down | 4186525000  | 4638725000  |
| Farnesyl pyrophosphate synthase                                                                                                                                                                                                                                                                                                 | <i>Fdps</i>        | 1.11 | Up   | 1007287500  | 907285000   |
| FAS-associated factor 2                                                                                                                                                                                                                                                                                                         | <i>Faf2</i>        | 1.05 | Up   | 230755000   | 219447500   |
| Fascin                                                                                                                                                                                                                                                                                                                          | <i>Fscn1</i>       | 1.17 | Down | 4726950000  | 5516200000  |
| Fatty acid synthase;[Acyl-carrier-protein] S-acetyltransferase;[Acyl-carrier-protein] S-malonyltransferase;3-oxoacyl-[acyl-carrier-protein] synthase;3-oxoacyl-[acyl-carrier-protein] reductase;3-hydroxyacyl-[acyl-carrier-protein] dehydratase;Enoyl-[acyl-carrier-protein] reductase;Oleoyl-[acyl-carrier-protein] hydrolase | <i>Fasn</i>        | 1.04 | Up   | 5155000000  | 4973700000  |
| Fatty acid-binding protein, epidermal                                                                                                                                                                                                                                                                                           | <i>Fabp5</i>       | 1.24 | Up   | 3915750000  | 3154100000  |
| Fatty acid-binding protein, heart                                                                                                                                                                                                                                                                                               | <i>Fabp3</i>       | 1.00 | Up   | 800862500   | 799795000   |
| Fatty aldehyde dehydrogenase                                                                                                                                                                                                                                                                                                    | <i>Aldh3a2</i>     | 1.08 | Up   | 1538275000  | 1424325000  |
| Fatty-acid amide hydrolase 1                                                                                                                                                                                                                                                                                                    | <i>Faah</i>        | 1.18 | Up   | 115700000   | 98455000    |
| F-box only protein 6                                                                                                                                                                                                                                                                                                            | <i>Fbxo6</i>       | 1.13 | Up   | 351442500   | 311037500   |
| FERM, RhoGEF and pleckstrin domain-containing protein 1                                                                                                                                                                                                                                                                         | <i>Farp1</i>       | 1.00 | Down | 77464000    | 77742500    |
| Ferritin heavy chain;Ferritin heavy chain, N-terminally processed                                                                                                                                                                                                                                                               | <i>Fth1</i>        | 1.02 | Down | 1071757500  | 1094730000  |
| Ferritin light chain 1;Protein FAM65B                                                                                                                                                                                                                                                                                           | <i>Ftl1;Fam65b</i> | 1.28 | Up   | 1986175000  | 1546800000  |
| Fibrinogen alpha chain;Fibrinopeptide A;Fibrinogen alpha chain                                                                                                                                                                                                                                                                  | <i>Fga</i>         | 1.86 | Down | 65288500    | 121578750   |
| Fibrinogen beta chain;Fibrinopeptide B;Fibrinogen beta chain                                                                                                                                                                                                                                                                    | <i>Fgb</i>         | 1.42 | Down | 67483000    | 96078000    |
| Fibrinogen gamma chain                                                                                                                                                                                                                                                                                                          | <i>Fgg</i>         | 1.45 | Down | 94733000    | 136922500   |
| Fibroblast growth factor 2                                                                                                                                                                                                                                                                                                      | <i>Fgf2</i>        | 1.37 | Up   | 230947500   | 168823333.3 |

|                                                                                                                           |                    |      |      |             |             |
|---------------------------------------------------------------------------------------------------------------------------|--------------------|------|------|-------------|-------------|
| Filamin-C                                                                                                                 | <i>Flnc</i>        | 1.55 | Up   | 222650000   | 143610000   |
| Flap endonuclease 1                                                                                                       | <i>Fen1</i>        | 1.12 | Up   | 756302500   | 678247500   |
| Four and a half LIM domains protein 1                                                                                     | <i>Fhl1</i>        | 1.13 | Up   | 648537500   | 572940000   |
| Fragile X mental retardation protein 1 homolog                                                                            | <i>Fmr1</i>        | 1.15 | Up   | 145952500   | 126827500   |
| Fructose-bisphosphate aldolase A                                                                                          | <i>Aldoa</i>       | 1.12 | Down | 54270250000 | 60619500000 |
| Fructose-bisphosphate aldolase C                                                                                          | <i>Aldoc</i>       | 1.02 | Down | 35491000000 | 36365500000 |
| Fumarate hydratase, mitochondrial                                                                                         | <i>Fh</i>          | 1.05 | Up   | 2440550000  | 2321325000  |
| Fumarylacetoacetate hydrolase domain-containing protein 2                                                                 | <i>Fahd2</i>       | 1.06 | Up   | 1061852500  | 999592500   |
| FUN14 domain-containing protein 1                                                                                         | <i>Func1</i>       | 1.26 | Down | 40045000    | 50572000    |
| G protein-activated inward rectifier potassium channel 4                                                                  | <i>Kcnj5</i>       | 1.22 | Up   | 33148000    | 27097000    |
| Galectin-1                                                                                                                | <i>Lgals1</i>      | 1.12 | Down | 891037500   | 995640000   |
| Gamma-adducin                                                                                                             | <i>Add3</i>        | 1.03 | Down | 1273317500  | 1307250000  |
| Gamma-aminobutyric acid receptor subunit alpha-1                                                                          | <i>Gabra1</i>      | 1.26 | Down | 122369500   | 154087500   |
| Gamma-aminobutyric acid receptor subunit beta-3                                                                           | <i>Gabrb3</i>      | 1.27 | Up   | 314863333.3 | 247365000   |
| Gamma-aminobutyric acid receptor subunit gamma-2                                                                          | <i>Gabrg2</i>      | 1.14 | Up   | 142395000   | 124815000   |
| Gamma-aminobutyric acid receptor-associated protein-like 2                                                                | <i>Gabarapl2</i>   | 1.03 | Up   | 106259000   | 103305500   |
| Gamma-aminobutyric acid type B receptor subunit 1                                                                         | <i>Gabbr1</i>      | 1.36 | Down | 76157000    | 103348000   |
| Gamma-crystallin B                                                                                                        | <i>Crygb</i>       | 1.70 | Down | 168032500   | 285753333.3 |
| Gamma-crystallin C                                                                                                        | <i>Crygc</i>       | 1.99 | Up   | 41397650    | 20802250    |
| Gamma-crystallin D                                                                                                        | <i>Crygd</i>       | 1.11 | Up   | 153507500   | 138702500   |
| Gamma-enolase                                                                                                             | <i>Eno2</i>        | 1.02 | Up   | 36167750000 | 35339750000 |
| Gamma-glutamyltransferase 7;Gamma-glutamyltransferase 7 heavy chain;Gamma-glutamyltransferase 7 light chain               | <i>Ggt7</i>        | 1.02 | Down | 129810000   | 131882500   |
| Gamma-synuclein                                                                                                           | <i>Sncg</i>        | 1.47 | Down | 609750000   | 896367500   |
| Gelsolin                                                                                                                  | <i>Gsn</i>         | 1.11 | Down | 235106666.7 | 260227500   |
| General transcription factor IIF subunit 2                                                                                | <i>Gtf2f2</i>      | 1.06 | Down | 202722500   | 215075000   |
| General transcription factor II-I                                                                                         | <i>Gtf2i</i>       | 1.04 | Up   | 958157500   | 920080000   |
| General vesicular transport factor p115                                                                                   | <i>Uso1</i>        | 1.11 | Up   | 816972500   | 733087500   |
| Gephyrin;Molybdopterin adenylyltransferase;Molybdopterin molybdenumtransferase                                            | <i>Gphn</i>        | 1.00 | Down | 1436875000  | 1443850000  |
| Geranylgeranyl transferase type-2 subunit alpha                                                                           | <i>Rabggt2</i>     | 1.08 | Up   | 278692500   | 257482500   |
| Glia maturation factor beta                                                                                               | <i>Gmfb</i>        | 1.30 | Down | 887127500   | 1156325000  |
| Glial fibrillary acidic protein                                                                                           | <i>Gfap</i>        | 1.01 | Down | 45340500000 | 45946250000 |
| Glucose-6-phosphate 1-dehydrogenase                                                                                       | <i>G6pdx</i>       | 1.04 | Up   | 2812925000  | 2706425000  |
| Glucose-6-phosphate isomerase                                                                                             | <i>Gpi</i>         | 1.01 | Down | 49207000000 | 49529000000 |
| Glutamate decarboxylase 1                                                                                                 | <i>Gad1</i>        | 1.00 | Up   | 501082500   | 500717500   |
| Glutamate decarboxylase 2                                                                                                 | <i>Gad2</i>        | 1.06 | Up   | 1393050000  | 1317050000  |
| Glutamate dehydrogenase 1, mitochondrial                                                                                  | <i>Glud1</i>       | 1.10 | Up   | 6985125000  | 6366775000  |
| Glutamate receptor-interacting protein 1                                                                                  | <i>Grip1</i>       | 1.07 | Up   | 130520000   | 121563333.3 |
| Glutaminase kidney isoform, mitochondrial;Glutaminase kidney isoform 68 kDa chain;Glutaminase kidney isoform 65 kDa chain | <i>Gls</i>         | 1.08 | Up   | 5973325000  | 5547725000  |
| Glutamine synthetase                                                                                                      | <i>Glul</i>        | 1.12 | Up   | 75880750000 | 67674750000 |
| Glutaredoxin-3                                                                                                            | <i>Glr3</i>        | 1.01 | Up   | 532307500   | 525332500   |
| Glutathione peroxidase 1                                                                                                  | <i>Gpx1</i>        | 1.08 | Down | 319337500   | 346390000   |
| Glutathione reductase                                                                                                     | <i>Gsr</i>         | 1.11 | Down | 489040000   | 540580000   |
| Glutathione S-transferase A6                                                                                              | <i>Gsta6</i>       | 1.14 | Up   | 208200000   | 182676666.7 |
| Glutathione S-transferase alpha-3;Glutathione S-transferase alpha-5                                                       | <i>Gsta3;Gsta5</i> | 1.06 | Down | 31239000000 | 32991250000 |
| Glutathione S-transferase alpha-4                                                                                         | <i>Gsta4</i>       | 1.08 | Up   | 1383400000  | 1286475000  |

|                                                                                          |                    |      |      |             |             |
|------------------------------------------------------------------------------------------|--------------------|------|------|-------------|-------------|
| Glutathione S-transferase kappa 1                                                        | <i>Gstk1</i>       | 1.29 | Up   | 184072500   | 142260000   |
| Glutathione S-transferase Mu 1                                                           | <i>Gstm1</i>       | 1.09 | Up   | 1912300000  | 1751625000  |
| Glutathione S-transferase Mu 5                                                           | <i>Gstm5</i>       | 1.18 | Up   | 2524200000  | 2143000000  |
| Glutathione S-transferase omega-1                                                        | <i>Gsto1</i>       | 1.13 | Up   | 688112500   | 608105000   |
| Glutathione S-transferase P                                                              | <i>Gstp1</i>       | 1.00 | Up   | 8590900000  | 8554050000  |
| Glutathione S-transferase theta-2                                                        | <i>Gstt2</i>       | 1.01 | Down | 1782475000  | 1794100000  |
| Glutathione S-transferase Yb-3                                                           | <i>Gstm3</i>       | 1.12 | Down | 9172700000  | 10287450000 |
| Glutathione synthetase                                                                   | <i>Gss</i>         | 1.04 | Down | 347905000   | 360752500   |
| Glyceraldehyde-3-phosphate dehydrogenase                                                 | <i>Gapdh</i>       | 1.02 | Up   | 1.85683E+11 | 1.82475E+11 |
| Glycerol kinase                                                                          | <i>Gk</i>          | 1.05 | Down | 228057500   | 240527500   |
| Glycerophosphodiester phosphodiesterase 1                                                | <i>Gde1</i>        | 1.20 | Down | 192427500   | 230490000   |
| Glycerophosphodiester phosphodiesterase domain-containing protein 1                      | <i>Gdpd1</i>       | 1.12 | Down | 118494666.7 | 133080000   |
| Glycine cleavage system H protein, mitochondrial                                         | <i>Gcsh</i>        | 1.76 | Up   | 142490000   | 80924000    |
| Glycine--tRNA ligase                                                                     | <i>Gars</i>        | 1.09 | Down | 1230860000  | 1342525000  |
| Glycogen phosphorylase, brain form                                                       | <i>Pygb</i>        | 1.05 | Up   | 9647900000  | 9177075000  |
| Glycogen phosphorylase, liver form                                                       | <i>Pygl</i>        | 1.26 | Up   | 326572500   | 260172500   |
| Glycogen phosphorylase, muscle form                                                      | <i>Pygm</i>        | 1.19 | Up   | 90068333.33 | 75990000    |
| Glycogen synthase kinase-3 alpha                                                         | <i>Gsk3a</i>       | 1.02 | Up   | 253237500   | 248042500   |
| Glycogen synthase kinase-3 beta                                                          | <i>Gsk3b</i>       | 1.01 | Up   | 467957500   | 461822500   |
| Glycogenin-1                                                                             | <i>Gyg1</i>        | 1.10 | Down | 407350000   | 447437500   |
| Glycylpeptide N-tetradecanoyltransferase 1                                               | <i>Nmt1</i>        | 1.11 | Up   | 295325000   | 266047500   |
| Glyoxalase domain-containing protein 4                                                   | <i>Glod4</i>       | 1.02 | Up   | 1212450000  | 1188475000  |
| GMP reductase 1                                                                          | <i>Gmpr</i>        | 1.10 | Down | 199357500   | 219190000   |
| GMP synthase [glutamine-hydrolyzing]                                                     | <i>Gmps</i>        | 1.07 | Up   | 742080000   | 690467500   |
| Golgi apparatus protein 1                                                                | <i>Glg1</i>        | 1.25 | Up   | 522922500   | 419327500   |
| Golgi reassembly-stacking protein 1                                                      | <i>Gorasp1</i>     | 1.47 | Up   | 56870000    | 38790000    |
| Golgi reassembly-stacking protein 2                                                      | <i>Gorasp2</i>     | 1.18 | Down | 297852500   | 352140000   |
| Golgi resident protein GCP60                                                             | <i>Acbd3</i>       | 1.97 | Up   | 117733500   | 59821500    |
| Golgi SNAP receptor complex member 2                                                     | <i>Gosr2</i>       | 1.25 | Down | 118532500   | 147585250   |
| Golgin subfamily A member 2                                                              | <i>Golga2</i>      | 1.26 | Up   | 145723333.3 | 116085000   |
| Golgin subfamily A member 4                                                              | <i>Golga4</i>      | 1.27 | Down | 52507000    | 66754000    |
| GPI inositol-deacylase                                                                   | <i>Pgap1</i>       | 1.74 | Down | 81943500    | 142834750   |
| Graves disease carrier protein                                                           | <i>Slc25a16</i>    | 1.17 | Up   | 8755850     | 7511566.667 |
| GRIP1-associated protein 1                                                               | <i>Gripap1</i>     | 1.14 | Down | 210952500   | 240100000   |
| Growth arrest-specific protein 7                                                         | <i>Gas7</i>        | 1.12 | Up   | 31886000    | 28573000    |
| Growth factor receptor-bound protein 2                                                   | <i>Grb2</i>        | 1.31 | Down | 313412500   | 409030000   |
| Growth hormone-inducible transmembrane protein                                           | <i>Ghitm</i>       | 1.29 | Down | 227832500   | 294775000   |
| GrpE protein homolog 1, mitochondrial                                                    | <i>Grpel1</i>      | 1.09 | Up   | 394355000   | 360757500   |
| GTP:AMP phosphotransferase AK3, mitochondrial                                            | <i>Ak3</i>         | 1.07 | Down | 266315000   | 285325000   |
| GTPase HRas;GTPase HRas, N-terminally processed                                          | <i>Hras</i>        | 1.07 | Down | 622460000   | 668580000   |
| GTPase KRas;GTPase KRas, N-terminally processed                                          | <i>Kras</i>        | 1.30 | Down | 245123333.3 | 317807500   |
| GTP-binding nuclear protein Ran;GTP-binding nuclear protein Ran, testis-specific isoform | <i>Ran;Rasl2-9</i> | 1.18 | Down | 9570850000  | 11275775000 |
| GTP-binding protein 1                                                                    | <i>Gtpbp1</i>      | 1.04 | Down | 484715000   | 503775000   |
| GTP-binding protein Rheb                                                                 | <i>Rheb</i>        | 1.17 | Up   | 260770000   | 222916666.7 |
| GTP-binding protein SAR1b                                                                | <i>Sar1b</i>       | 1.04 | Down | 165343333.3 | 172272500   |
| Guanine nucleotide-binding protein G(i) subunit alpha-1                                  | <i>Gnai1</i>       | 1.03 | Down | 672870000   | 694762500   |
| Guanine nucleotide-binding protein G(i) subunit alpha-2                                  | <i>Gnai2</i>       | 1.10 | Up   | 6426075000  | 5866200000  |
| Guanine nucleotide-binding protein G(I)/G(S)/G(O) subunit gamma-11                       | <i>Gng11</i>       | 2.00 | Down | 317790000   | 634080000   |

|                                                                                                                                           |                 |      |      |             |             |
|-------------------------------------------------------------------------------------------------------------------------------------------|-----------------|------|------|-------------|-------------|
| Guanine nucleotide-binding protein G(I)/G(S)/G(T) subunit beta-1                                                                          | <i>Gnb1</i>     | 1.12 | Up   | 80706250000 | 72144000000 |
| Guanine nucleotide-binding protein G(I)/G(S)/G(T) subunit beta-2                                                                          | <i>Gnb2</i>     | 1.03 | Up   | 6113350000  | 5906675000  |
| Guanine nucleotide-binding protein G(I)/G(S)/G(T) subunit beta-3                                                                          | <i>Gnb3</i>     | 1.05 | Up   | 5785950000  | 5497625000  |
| Guanine nucleotide-binding protein G(k) subunit alpha                                                                                     | <i>Gnai3</i>    | 1.16 | Down | 212043333.3 | 245787500   |
| Guanine nucleotide-binding protein G(o) subunit alpha                                                                                     | <i>Gnao1</i>    | 1.12 | Up   | 32652500000 | 29154750000 |
| Guanine nucleotide-binding protein G(q) subunit alpha                                                                                     | <i>Gnaq</i>     | 1.10 | Up   | 1922075000  | 1743100000  |
| Guanine nucleotide-binding protein G(s) subunit alpha isoforms short;Guanine nucleotide-binding protein G(s) subunit alpha isoforms XLas  | <i>Gnas</i>     | 1.01 | Down | 592595000   | 596167500   |
| Guanine nucleotide-binding protein G(t) subunit alpha-3                                                                                   | <i>Gnat3</i>    | 1.08 | Up   | 8918625000  | 8286775000  |
| Guanine nucleotide-binding protein G(z) subunit alpha                                                                                     | <i>Gnaz</i>     | 1.17 | Up   | 1046917500  | 897355000   |
| Guanine nucleotide-binding protein subunit alpha-11                                                                                       | <i>Gna11</i>    | 1.01 | Up   | 492622500   | 487447500   |
| Guanine nucleotide-binding protein subunit alpha-13                                                                                       | <i>Gna13</i>    | 1.04 | Up   | 244402500   | 235722500   |
| Guanine nucleotide-binding protein subunit beta-2-like 1;Guanine nucleotide-binding protein subunit beta-2-like 1, N-terminally processed | <i>Gnb2l1</i>   | 1.04 | Up   | 4232350000  | 4068100000  |
| Guanine nucleotide-binding protein subunit beta-5                                                                                         | <i>Gnb5</i>     | 1.25 | Up   | 2115825000  | 1697950000  |
| Guanine nucleotide-binding protein-like 1                                                                                                 | <i>Gnl1</i>     | 1.12 | Down | 108306750   | 121226666.7 |
| Guanylate cyclase soluble subunit alpha-2                                                                                                 | <i>Gucy1a2</i>  | 1.34 | Up   | 64621500    | 48102000    |
| Guanylate cyclase soluble subunit alpha-3                                                                                                 | <i>Gucy1a3</i>  | 1.02 | Up   | 1631400000  | 1603750000  |
| Guanylate cyclase soluble subunit beta-1                                                                                                  | <i>Gucy1b3</i>  | 1.01 | Down | 3295875000  | 3315875000  |
| Guanylyl cyclase GC-E                                                                                                                     | <i>Gucy2e</i>   | 1.19 | Up   | 1921875000  | 1611225000  |
| H(+)/Cl(-) exchange transporter 4                                                                                                         | <i>Clcn4</i>    | 1.02 | Down | 45154000    | 45871000    |
| H/ACA ribonucleoprotein complex subunit 4                                                                                                 | <i>Dkc1</i>     | 1.11 | Down | 193385000   | 214427500   |
| Haloacid dehalogenase-like hydrolase domain-containing protein 2                                                                          | <i>Hdhd2</i>    | 1.07 | Up   | 572632500   | 535422500   |
| Haptoglobin;Haptoglobin alpha chain;Haptoglobin beta chain                                                                                | <i>Hp</i>       | 1.35 | Down | 57383000    | 77297500    |
| Heat shock 70 kDa protein 13                                                                                                              | <i>Hspa13</i>   | 1.00 | Down | 188020000   | 188536666.7 |
| Heat shock 70 kDa protein 1B;Heat shock 70 kDa protein 1A                                                                                 | <i>Hspa1a</i>   | 1.18 | Up   | 8285150000  | 7034350000  |
| Heat shock 70 kDa protein 4                                                                                                               | <i>Hspa4</i>    | 1.00 | Up   | 6784950000  | 6778875000  |
| Heat shock cognate 71 kDa protein                                                                                                         | <i>Hspa8</i>    | 1.13 | Up   | 59393000000 | 52725000000 |
| Heat shock protein 105 kDa                                                                                                                | <i>Hsph1</i>    | 1.16 | Up   | 951197500   | 818570000   |
| Heat shock protein 75 kDa, mitochondrial                                                                                                  | <i>Trap1</i>    | 1.08 | Down | 619815000   | 669042500   |
| Heat shock protein HSP 90-alpha                                                                                                           | <i>Hsp90aa1</i> | 1.05 | Up   | 53325000000 | 50677500000 |
| Heat shock protein HSP 90-beta                                                                                                            | <i>Hsp90ab1</i> | 1.13 | Up   | 15079000000 | 13377250000 |
| Heat shock-related 70 kDa protein 2                                                                                                       | <i>Hspa2</i>    | 1.25 | Down | 335715000   | 421197500   |
| Heme oxygenase 2                                                                                                                          | <i>Hmox2</i>    | 1.07 | Up   | 221450000   | 206350000   |
| Hemoglobin subunit alpha-1/2                                                                                                              | <i>Hba1</i>     | 1.13 | Down | 27838000000 | 31397500000 |
| Hemoglobin subunit beta-1                                                                                                                 | <i>Hbb</i>      | 1.14 | Down | 39393750000 | 44857000000 |
| Hemoglobin subunit beta-2                                                                                                                 | <i>Hbb-b2</i>   | 2.31 | Down | 1296967500  | 2997475000  |
| Hemopexin                                                                                                                                 | <i>Hpx</i>      | 1.06 | Down | 255630000   | 271825000   |
| Hepatocyte growth factor-regulated tyrosine kinase substrate                                                                              | <i>Hgs</i>      | 1.14 | Down | 286605000   | 326682500   |
| Hepatoma-derived growth factor                                                                                                            | <i>Hdgf</i>     | 1.12 | Up   | 1721550000  | 1539525000  |
| Hepatoma-derived growth factor-related protein 2                                                                                          | <i>Hdgfrp2</i>  | 1.13 | Up   | 296447500   | 262925000   |
| Hepatoma-derived growth factor-related protein 3                                                                                          | <i>Hdgfrp3</i>  | 1.05 | Up   | 826805000   | 785612500   |

|                                                                                                               |                   |      |      |             |             |
|---------------------------------------------------------------------------------------------------------------|-------------------|------|------|-------------|-------------|
| Heterochromatin protein 1-binding protein 3                                                                   | <i>Hp1bp3</i>     | 1.33 | Up   | 503252500   | 377260000   |
| Heterogeneous nuclear ribonucleoprotein A1;Heterogeneous nuclear ribonucleoprotein A1, N-terminally processed | <i>Hnrnpa1</i>    | 1.18 | Down | 5288775000  | 6215050000  |
| Heterogeneous nuclear ribonucleoprotein A3                                                                    | <i>Hnrnpa3</i>    | 1.21 | Down | 9026475000  | 10925000000 |
| Heterogeneous nuclear ribonucleoprotein C                                                                     | <i>Hnrnpc</i>     | 1.16 | Down | 3123450000  | 3624950000  |
| Heterogeneous nuclear ribonucleoprotein D0                                                                    | <i>Hnrnpd</i>     | 1.00 | Down | 10995725000 | 11008500000 |
| Heterogeneous nuclear ribonucleoprotein D-like                                                                | <i>Hnrnpdl</i>    | 1.17 | Down | 1690750000  | 1971825000  |
| Heterogeneous nuclear ribonucleoprotein F;Heterogeneous nuclear ribonucleoprotein F, N-terminally processed   | <i>Hnrnpf</i>     | 1.20 | Down | 1682732500  | 2024550000  |
| Heterogeneous nuclear ribonucleoprotein H;Heterogeneous nuclear ribonucleoprotein H, N-terminally processed   | <i>Hnrnph1</i>    | 1.13 | Down | 7179325000  | 8088400000  |
| Heterogeneous nuclear ribonucleoprotein H2                                                                    | <i>Hnrnph2</i>    | 1.03 | Down | 2278400000  | 2346125000  |
| Heterogeneous nuclear ribonucleoprotein K                                                                     | <i>Hnrnpk</i>     | 1.01 | Up   | 20011500000 | 19891250000 |
| Heterogeneous nuclear ribonucleoprotein M                                                                     | <i>Hnrnpm</i>     | 1.01 | Down | 7175225000  | 7281125000  |
| Heterogeneous nuclear ribonucleoprotein Q                                                                     | <i>Syncrip</i>    | 1.05 | Up   | 1231685000  | 1171525000  |
| Heterogeneous nuclear ribonucleoproteins A2/B1                                                                | <i>Hnrnpa2b1</i>  | 1.33 | Down | 16343250000 | 21767250000 |
| Hexokinase-1                                                                                                  | <i>Hk1</i>        | 1.08 | Up   | 21469250000 | 19893000000 |
| Hexokinase-2                                                                                                  | <i>Hk2</i>        | 1.06 | Up   | 5568225000  | 5244700000  |
| High affinity choline transporter 1                                                                           | <i>Slc5a7</i>     | 1.02 | Down | 52821500    | 53963000    |
| High mobility group nucleosome-binding domain-containing protein 5                                            | <i>Hmgn5</i>      | 1.04 | Down | 350206666.7 | 363690000   |
| High mobility group protein B1                                                                                | <i>Hmgb1</i>      | 1.08 | Down | 18432250000 | 19818000000 |
| High mobility group protein B2                                                                                | <i>Hmgb2</i>      | 1.19 | Down | 3591000000  | 4291200000  |
| High mobility group protein HMG-I/HMG-Y                                                                       | <i>Hmga1</i>      | 1.06 | Up   | 149619666.7 | 141102500   |
| Hippocalcin-like protein 1                                                                                    | <i>Hpcal1</i>     | 1.07 | Up   | 1553875000  | 1446350000  |
| Hippocalcin-like protein 4                                                                                    | <i>Hpcal4</i>     | 1.22 | Up   | 361112500   | 296485000   |
| Histidine triad nucleotide-binding protein 1                                                                  | <i>Hint1</i>      | 1.09 | Down | 3708975000  | 4035175000  |
| Histone deacetylase 1                                                                                         | <i>Hdac1</i>      | 1.14 | Down | 790920000   | 899390000   |
| Histone H1.4                                                                                                  | <i>Hist1h1e</i>   | 1.08 | Up   | 2014800000  | 1872325000  |
| Histone H2A type 2-A                                                                                          | <i>Hist2h2aa3</i> | 1.99 | Down | 4218075000  | 8381700000  |
| Histone H2A.Z                                                                                                 | <i>H2afz</i>      | 1.07 | Up   | 1872875000  | 1748800000  |
| Histone H2B type 1;Histone H2B type 1-A                                                                       | <i>Hist1h2ba</i>  | 1.78 | Down | 4303400000  | 7642825000  |
| Histone H3.3;Histone H3.1                                                                                     | <i>H3f3b</i>      | 1.87 | Down | 925393333.3 | 1734025000  |
| Histone H4;Osteogenic growth peptide                                                                          | <i>Hist1h4b</i>   | 2.07 | Down | 2266950000  | 4700975000  |
| Histone-binding protein RBBP7                                                                                 | <i>Rbbp7</i>      | 1.08 | Up   | 1297550000  | 1200075000  |
| Homer protein homolog 1                                                                                       | <i>Homer1</i>     | 1.40 | Down | 26482000    | 37039000    |
| Hsc70-interacting protein                                                                                     | <i>Stt13</i>      | 1.22 | Down | 1507625000  | 1832875000  |
| Hsp90 co-chaperone Cdc37;Hsp90 co-chaperone Cdc37, N-terminally processed                                     | <i>Cdc37</i>      | 1.06 | Up   | 800742500   | 756665000   |
| Huntingtin                                                                                                    | <i>Htt</i>        | 1.16 | Down | 133722500   | 155640000   |
| Hydroxyacyl-coenzyme A dehydrogenase, mitochondrial                                                           | <i>Hadh</i>       | 1.15 | Up   | 410652500   | 357877500   |
| Hydroxyacylglutathione hydrolase, mitochondrial                                                               | <i>Hagh</i>       | 1.19 | Up   | 719777500   | 605027500   |
| Hydroxymethylglutaryl-CoA lyase, mitochondrial                                                                | <i>Hmgcl</i>      | 1.16 | Up   | 547810000   | 473795000   |

|                                                                                                                                       |                    |      |      |             |             |
|---------------------------------------------------------------------------------------------------------------------------------------|--------------------|------|------|-------------|-------------|
| Hydroxymethylglutaryl-CoA synthase, cytoplasmic                                                                                       | <i>Hmgcs1</i>      | 1.27 | Down | 165335000   | 209472500   |
| Hydroxysteroid dehydrogenase-like protein 2                                                                                           | <i>Hsd12</i>       | 1.01 | Up   | 190190000   | 187676666.7 |
| Hypoxanthine-guanine phosphoribosyltransferase                                                                                        | <i>Hprt1</i>       | 1.06 | Up   | 12138750000 | 11473150000 |
| Hypoxia up-regulated protein 1                                                                                                        | <i>Hyou1</i>       | 1.06 | Up   | 2153325000  | 2036350000  |
| Ig gamma-2A chain C region                                                                                                            | <i>Igg-2a</i>      | 1.06 | Down | 371045000   | 394817500   |
| Ig gamma-2B chain C region                                                                                                            | <i>Igh-1a</i>      | 1.05 | Down | 198845000   | 208820000   |
| Ig kappa chain C region, A allele                                                                                                     | <i>N/A</i>         | 1.14 | Down | 202202500   | 230445000   |
| Importin subunit alpha-5;Importin subunit alpha-5, N-terminally processed;Importin subunit alpha-6                                    | <i>Kpna1;Kpna5</i> | 1.01 | Up   | 208213333.3 | 206620000   |
| Importin subunit beta-1                                                                                                               | <i>Kpnb1</i>       | 1.04 | Up   | 3629150000  | 3477400000  |
| Inactive hydroxysteroid dehydrogenase-like protein 1                                                                                  | <i>Hsd11</i>       | 1.21 | Up   | 160574750   | 132510000   |
| Inactive phospholipase C-like protein 1                                                                                               | <i>Plc1</i>        | 1.02 | Up   | 151170000   | 147830000   |
| Inosine triphosphate pyrophosphatase                                                                                                  | <i>Itpa</i>        | 1.14 | Down | 654085000   | 748060000   |
| Inosine-5-monophosphate dehydrogenase 1                                                                                               | <i>Impdh1</i>      | 1.15 | Up   | 8673825000  | 7574475000  |
| Inosine-5-monophosphate dehydrogenase 2                                                                                               | <i>Impdh2</i>      | 1.01 | Up   | 615880000   | 608345000   |
| Inositol hexakisphosphate and diphosphoinositol-pentakisphosphate kinase 1                                                            | <i>Ppip5k1</i>     | 1.34 | Down | 51645000    | 69024000    |
| Inositol monophosphatase 1                                                                                                            | <i>Impa1</i>       | 1.01 | Up   | 3246100000  | 3211875000  |
| Inositol polyphosphate 5-phosphatase OCRL-1                                                                                           | <i>Ocrl</i>        | 1.21 | Down | 57134500    | 68954000    |
| Inositol-3-phosphate synthase 1                                                                                                       | <i>Isyna1</i>      | 1.03 | Up   | 99229000    | 96346000    |
| Insulin-degrading enzyme                                                                                                              | <i>Ide</i>         | 1.01 | Down | 337337500   | 339600000   |
| Integral membrane protein 2B;BRI2, membrane form;BRI2 intracellular domain;BRI2C, soluble form;Bri23 peptide                          | <i>Itm2b</i>       | 1.40 | Down | 71998000    | 101122500   |
| Integral membrane protein 2C;CT-BRI3                                                                                                  | <i>Itm2c</i>       | 1.27 | Up   | 124291333.3 | 98063000    |
| Integrin beta-1                                                                                                                       | <i>Itgb1</i>       | 1.16 | Up   | 341730000   | 295642500   |
| Integrin-linked kinase-associated serine/threonine phosphatase 2C                                                                     | <i>Ilkap</i>       | 1.08 | Up   | 233235000   | 215125000   |
| Integrin-linked protein kinase                                                                                                        | <i>Ilk</i>         | 1.18 | Down | 78921500    | 92857750    |
| Inter-alpha-trypsin inhibitor heavy chain H3                                                                                          | <i>Itih3</i>       | 1.10 | Down | 42086500    | 46236000    |
| Interferon regulatory factor 2-binding protein-like                                                                                   | <i>Irf2bpl</i>     | 1.08 | Down | 209100000   | 225486666.7 |
| Interferon-inducible double-stranded RNA-dependent protein kinase activator A                                                         | <i>Prkra</i>       | 1.13 | Down | 317282500   | 359360000   |
| Interleukin enhancer-binding factor 2                                                                                                 | <i>Ilf2</i>        | 1.05 | Up   | 2212200000  | 2113300000  |
| Interleukin enhancer-binding factor 3                                                                                                 | <i>Ilf3</i>        | 1.06 | Up   | 2496450000  | 2353675000  |
| Interphotoreceptor matrix proteoglycan 1                                                                                              | <i>Impg1</i>       | 1.25 | Up   | 1269950000  | 1015350000  |
| Interphotoreceptor matrix proteoglycan 2                                                                                              | <i>Impg2</i>       | 1.33 | Up   | 1663300000  | 1255125000  |
| Intersectin-1                                                                                                                         | <i>Its1</i>        | 1.17 | Up   | 259090000   | 220515000   |
| IQ motif and SEC7 domain-containing protein 3                                                                                         | <i>Iqsec3</i>      | 1.00 | Down | 432840000   | 433207500   |
| Isoamyl acetate-hydrolyzing esterase 1 homolog                                                                                        | <i>Iah1</i>        | 1.14 | Down | 423542500   | 482540000   |
| Isoaspartyl peptidase/L-asparaginase;Isoaspartyl peptidase/L-asparaginase alpha chain;Isoaspartyl peptidase/L-asparaginase beta chain | <i>Asrgl1</i>      | 1.10 | Up   | 998547500   | 907345000   |
| Isochorismatase domain-containing protein 1                                                                                           | <i>Isoc1</i>       | 1.11 | Up   | 436585000   | 394977500   |
| Isocitrate dehydrogenase [NAD] subunit alpha, mitochondrial                                                                           | <i>Idh3a</i>       | 1.07 | Up   | 9318050000  | 8738100000  |
| Isocitrate dehydrogenase [NAD] subunit beta, mitochondrial                                                                            | <i>Idh3B</i>       | 1.03 | Up   | 5476250000  | 5292225000  |

|                                                                             |                  |      |      |             |             |
|-----------------------------------------------------------------------------|------------------|------|------|-------------|-------------|
| Isocitrate dehydrogenase [NAD] subunit gamma 1, mitochondrial               | <i>Idh3g</i>     | 1.00 | Down | 2963100000  | 2970175000  |
| Isocitrate dehydrogenase [NADP] cytoplasmic                                 | <i>Idh1</i>      | 1.00 | Up   | 2210150000  | 2202825000  |
| Isocitrate dehydrogenase [NADP], mitochondrial                              | <i>Idh2</i>      | 1.09 | Up   | 2271350000  | 2085850000  |
| Isovaleryl-CoA dehydrogenase, mitochondrial                                 | <i>Ivd</i>       | 1.19 | Down | 1001740000  | 1191650000  |
| IST1 homolog                                                                | <i>Ist1</i>      | 1.17 | Up   | 233097500   | 198567500   |
| Joubertin                                                                   | <i>Ahi1</i>      | 1.19 | Down | 127176666.7 | 151715000   |
| Junction plakoglobin                                                        | <i>Jup</i>       | 1.10 | Up   | 84295000    | 76313750    |
| Kelch-like protein 22                                                       | <i>Klhl22</i>    | 1.40 | Down | 26188000    | 36730000    |
| Keratin, type I cytoskeletal 18                                             | <i>Krt18</i>     | 1.33 | Up   | 212460000   | 159785000   |
| Keratin, type II cytoskeletal 8                                             | <i>Krt8</i>      | 1.08 | Down | 153700000   | 166310000   |
| Ketimine reductase mu-crystallin                                            | <i>Crym</i>      | 1.13 | Up   | 24126750000 | 21444750000 |
| KH domain-containing, RNA-binding, signal transduction-associated protein 1 | <i>Khdrbs1</i>   | 1.30 | Down | 1402775000  | 1824300000  |
| KH domain-containing, RNA-binding, signal transduction-associated protein 3 | <i>Khdrbs3</i>   | 1.07 | Down | 215170000   | 229326666.7 |
| KIF1-binding protein                                                        | <i>Kbp</i>       | 1.09 | Down | 80833000    | 88035000    |
| Kinase D-interacting substrate of 220 kDa                                   | <i>Kidins220</i> | 1.16 | Up   | 17879500    | 15479000    |
| Kinesin heavy chain isoform 5A                                              | <i>Kif5a</i>     | 1.01 | Down | 220686666.7 | 223190000   |
| Kinesin light chain 1                                                       | <i>Klc1</i>      | 1.01 | Up   | 556360000   | 548912500   |
| Kinesin-1 heavy chain                                                       | <i>Kif5b</i>     | 1.03 | Down | 1391275000  | 1434400000  |
| Kinesin-like protein KIF1B                                                  | <i>Kif1b</i>     | 1.03 | Down | 314005000   | 324820000   |
| Kinesin-like protein KIF2A                                                  | <i>Kif2a</i>     | 1.02 | Up   | 647130000   | 632467500   |
| Kinesin-like protein KIF3C                                                  | <i>Kif3c</i>     | 1.30 | Up   | 114440000   | 87719000    |
| Kynurenine/alpha-aminoadipate aminotransferase, mitochondrial               | <i>Aadat</i>     | 1.18 | Up   | 544120000   | 462027500   |
| Kynurenine--oxoglutarate transaminase 1, mitochondrial                      | <i>Ccbl1</i>     | 1.01 | Down | 206425000   | 208560000   |
| Lactadherin                                                                 | <i>Mfge8</i>     | 1.07 | Down | 272680000   | 290785000   |
| Lactoylglutathione lyase                                                    | <i>Glo1</i>      | 1.01 | Down | 8229225000  | 8296350000  |
| Lambda-crystallin homolog                                                   | <i>Cryl1</i>     | 1.07 | Down | 152153333.3 | 162827500   |
| Lamina-associated polypeptide 2, isoform beta                               | <i>Tmpo</i>      | 1.40 | Down | 1405150000  | 1960950000  |
| Lamin-B1                                                                    | <i>Lmnb1</i>     | 3.42 | Down | 1433960000  | 4896975000  |
| LanC-like protein 1                                                         | <i>Lancl1</i>    | 1.03 | Down | 2034250000  | 2104425000  |
| La-related protein 7                                                        | <i>Larp7</i>     | 1.24 | Down | 90351000    | 112020000   |
| Large neutral amino acids transporter small subunit 1                       | <i>Slc7a5</i>    | 5.14 | Up   | 132143000   | 25704000    |
| Large proline-rich protein BAG6                                             | <i>Bag6</i>      | 1.12 | Up   | 665765000   | 592242500   |
| Latrophilin-3                                                               | <i>Lphn3</i>     | 1.08 | Up   | 171890000   | 158825000   |
| LDLR chaperone MESD                                                         | <i>Mesdc2</i>    | 1.02 | Up   | 119337333.3 | 116795000   |
| Lethal(2) giant larvae protein homolog 1                                    | <i>Llg1</i>      | 1.20 | Up   | 171165000   | 142760000   |
| Leucine carboxyl methyltransferase 1                                        | <i>Lcmt1</i>     | 1.02 | Up   | 170415000   | 166320000   |
| Leucine zipper transcription factor-like protein 1                          | <i>Lztfl1</i>    | 1.10 | Up   | 294555000   | 267435000   |
| Leucine-rich PPR motif-containing protein, mitochondrial                    | <i>Lrpprc</i>    | 1.10 | Up   | 2255325000  | 2048925000  |
| Leucine-rich repeat-containing protein 15                                   | <i>Lrrc15</i>    | 1.14 | Up   | 141670000   | 124190000   |
| Leucine-rich repeat-containing protein 4B                                   | <i>Lrrc4b</i>    | 1.17 | Down | 85375500    | 99688500    |
| Leucine-rich repeat-containing protein 57                                   | <i>Lrrc57</i>    | 1.12 | Down | 133135000   | 149115000   |
| Leucine-rich repeat-containing protein 59                                   | <i>Lrrc59</i>    | 1.26 | Up   | 1357850000  | 1077587500  |
| Leukocyte surface antigen CD47                                              | <i>Cd47</i>      | 1.00 | Up   | 400025000   | 398810000   |
| Leukotriene A-4 hydrolase                                                   | <i>Lta4h</i>     | 1.04 | Up   | 3109375000  | 2988400000  |
| LIM and SH3 domain protein 1                                                | <i>Lasp1</i>     | 1.46 | Down | 931942500   | 1362250000  |
| Limbic system-associated membrane protein                                   | <i>Lsamp</i>     | 1.09 | Down | 1787800000  | 1956500000  |
| Lipid phosphate phosphohydrolase 3                                          | <i>Ppap2b</i>    | 1.31 | Up   | 121150000   | 92748000    |
| Lipoma HMGIC fusion partner-like protein 4                                  | <i>Lhfp14</i>    | 1.05 | Up   | 34271500    | 32633250    |
| Liprin-alpha-3                                                              | <i>Ppfia3</i>    | 1.50 | Up   | 132940000   | 88788000    |

|                                                                              |                |      |      |             |             |
|------------------------------------------------------------------------------|----------------|------|------|-------------|-------------|
| L-lactate dehydrogenase A chain                                              | <i>Ldha</i>    | 1.01 | Down | 1.30363E+11 | 1.31398E+11 |
| L-lactate dehydrogenase B chain                                              | <i>Ldhb</i>    | 1.08 | Down | 16327500000 | 17644500000 |
| Lon protease homolog, mitochondrial                                          | <i>Lonp1</i>   | 1.02 | Down | 837132500   | 853117500   |
| Long-chain fatty acid transport protein 1                                    | <i>Slc27a1</i> | 1.00 | Down | 1101237500  | 1104200000  |
| Long-chain specific acyl-CoA dehydrogenase, mitochondrial                    | <i>Acadl</i>   | 1.10 | Up   | 115816333.3 | 105346333.3 |
| Long-chain-fatty-acid--CoA ligase 1                                          | <i>Acs11</i>   | 1.07 | Down | 1378400000  | 1473200000  |
| Long-chain-fatty-acid--CoA ligase 3                                          | <i>Acs13</i>   | 1.15 | Down | 811712500   | 934005000   |
| Long-chain-fatty-acid--CoA ligase 6                                          | <i>Acs16</i>   | 1.02 | Up   | 5044075000  | 4948350000  |
| Low molecular weight phosphotyrosine protein phosphatase                     | <i>Acp1</i>    | 1.08 | Down | 837690000   | 904312500   |
| Lupus La protein homolog                                                     | <i>Ssb</i>     | 1.06 | Up   | 2068575000  | 1944650000  |
| Lysophosphatidylcholine acyltransferase 1                                    | <i>Lpcat1</i>  | 1.05 | Down | 511292500   | 534890000   |
| Lysosomal alpha-glucosidase                                                  | <i>Gaa</i>     | 1.35 | Down | 77176000    | 104137333.3 |
| Lysosome membrane protein 2                                                  | <i>Scarb2</i>  | 1.48 | Down | 120363666.7 | 177835000   |
| Lysosome-associated membrane glycoprotein 1                                  | <i>Lamp1</i>   | 1.19 | Down | 212067500   | 253380000   |
| Lysosome-associated membrane glycoprotein 5                                  | <i>Lamp5</i>   | 1.49 | Up   | 129775000   | 87132000    |
| m7GpppX diphosphatase                                                        | <i>Dcps</i>    | 1.08 | Up   | 1506775000  | 1397800000  |
| Macrophage migration inhibitory factor                                       | <i>Mif</i>     | 1.03 | Down | 6875150000  | 7047475000  |
| MAGUK p55 subfamily member 4                                                 | <i>Mpp4</i>    | 1.14 | Down | 434482500   | 495912500   |
| MAGUK p55 subfamily member 7                                                 | <i>Mpp7</i>    | 1.20 | Down | 56831000    | 68116000    |
| Major prion protein                                                          | <i>Prnp</i>    | 1.01 | Up   | 685240000   | 675465000   |
| Malate dehydrogenase, cytoplasmic                                            | <i>Mdh1</i>    | 1.10 | Up   | 35442750000 | 32366500000 |
| Malate dehydrogenase, mitochondrial                                          | <i>Mdh2</i>    | 1.08 | Up   | 40608750000 | 37482000000 |
| Malectin                                                                     | <i>Mlec</i>    | 1.05 | Up   | 180687500   | 172533333.3 |
| Maleylacetoacetate isomerase                                                 | <i>Gstz1</i>   | 1.10 | Down | 96771000    | 106100666.7 |
| Malignant T-cell-amplified sequence 1                                        | <i>Mcts1</i>   | 1.08 | Up   | 165933333.3 | 152983333.3 |
| Mammalian ependymin-related protein 1                                        | <i>Epd1</i>    | 1.34 | Down | 77927000    | 104124666.7 |
| Mannose-6-phosphate isomerase                                                | <i>Mpi</i>     | 1.11 | Up   | 1217700000  | 1101542500  |
| Mannosyl-oligosaccharide glucosidase                                         | <i>Mogs</i>    | 1.16 | Down | 113371000   | 131737500   |
| MAP kinase-activating death domain protein                                   | <i>Madd</i>    | 1.01 | Up   | 648107500   | 642735000   |
| MAP/microtubule affinity-regulating kinase 3                                 | <i>Mark3</i>   | 1.04 | Down | 93509000    | 96933750    |
| Matrin-3                                                                     | <i>Matr3</i>   | 1.21 | Down | 7945775000  | 9591100000  |
| Medium-chain specific acyl-CoA dehydrogenase, mitochondrial                  | <i>Acadm</i>   | 1.02 | Up   | 1112397500  | 1091085000  |
| Medium-wave-sensitive opsin 1                                                | <i>Opn1mw</i>  | 1.20 | Up   | 208880000   | 174285000   |
| Membrane-associated guanylate kinase, WW and PDZ domain-containing protein 1 | <i>Magi1</i>   | 1.05 | Up   | 60856666.67 | 58208000    |
| Membrane-associated guanylate kinase, WW and PDZ domain-containing protein 3 | <i>Magi3</i>   | 1.07 | Up   | 64627500    | 60290666.67 |
| Membrane-associated phosphatidylinositol transfer protein 1                  | <i>Pitpnm1</i> | 1.03 | Up   | 426175000   | 412740000   |
| Membrane-associated progesterone receptor component 1                        | <i>Pgrmc1</i>  | 1.01 | Down | 1613775000  | 1628825000  |
| Membrane-associated progesterone receptor component 2                        | <i>Pgrmc2</i>  | 1.17 | Up   | 431296666.7 | 370033333.3 |
| Mesencephalic astrocyte-derived neurotrophic factor                          | <i>Manf</i>    | 1.16 | Down | 222286666.7 | 257200000   |
| Metabotropic glutamate receptor 2                                            | <i>Grm2</i>    | 1.03 | Up   | 217622500   | 212275000   |
| Metastasis-associated protein MTA1                                           | <i>Mta1</i>    | 1.04 | Up   | 132120000   | 127306666.7 |
| Methionine adenosyltransferase 2 subunit beta                                | <i>Mat2b</i>   | 1.24 | Up   | 431447500   | 347255000   |
| Methionine aminopeptidase 2                                                  | <i>Metap2</i>  | 1.50 | Down | 152010000   | 228252500   |
| Methyl-CpG-binding protein 2                                                 | <i>Mecp2</i>   | 1.84 | Down | 217625000   | 399940000   |
| Methylcrotonoyl-CoA carboxylase subunit alpha, mitochondrial                 | <i>Mccc1</i>   | 1.01 | Down | 109674250   | 111313333.3 |
| Methylmalonate-semialdehyde dehydrogenase [acylating], mitochondrial         | <i>Aldh6a1</i> | 1.02 | Up   | 503292500   | 494407500   |

|                                                                          |                    |      |      |             |             |
|--------------------------------------------------------------------------|--------------------|------|------|-------------|-------------|
| Methylosome protein 50                                                   | <i>Wdr77</i>       | 1.05 | Down | 264726666.7 | 279057500   |
| Methylthioribose-1-phosphate isomerase                                   | <i>Mri1</i>        | 1.20 | Up   | 416187500   | 346792500   |
| Mevalonate kinase                                                        | <i>Mvk</i>         | 1.17 | Down | 43639500    | 51040666.67 |
| MICOS complex subunit Mic25                                              | <i>Chchd6</i>      | 1.14 | Down | 374015000   | 424927500   |
| MICOS complex subunit Mic60                                              | <i>Immt</i>        | 1.00 | Down | 2662175000  | 2668200000  |
| Microsomal glutathione S-transferase 1                                   | <i>Mgst1</i>       | 1.13 | Down | 95067000    | 107685000   |
| Microtubule-actin cross-linking factor 1                                 | <i>Macf1</i>       | 1.01 | Down | 937972500   | 947847500   |
| Microtubule-associated protein 1A;MAP1A heavy chain;MAP1 light chain LC2 | <i>Map1a</i>       | 1.01 | Down | 2047050000  | 2073925000  |
| Microtubule-associated protein 1B;MAP1B heavy chain;MAP1 light chain LC1 | <i>Map1b</i>       | 1.01 | Up   | 12824500000 | 12741250000 |
| Microtubule-associated protein 1S;MAP1S heavy chain;MAP1S light chain    | <i>Map1s</i>       | 1.04 | Up   | 428992500   | 412165000   |
| Microtubule-associated protein 2                                         | <i>Map2</i>        | 1.29 | Down | 4308975000  | 5560100000  |
| Microtubule-associated protein 4                                         | <i>Map4</i>        | 1.24 | Down | 2913675000  | 3619925000  |
| Microtubule-associated protein 6                                         | <i>Map6</i>        | 1.14 | Down | 3230575000  | 3688300000  |
| Microtubule-associated protein RP/EB family member 1                     | <i>Mapre1</i>      | 1.03 | Down | 569165000   | 585057500   |
| Microtubule-associated protein RP/EB family member 2                     | <i>Mapre2</i>      | 1.44 | Down | 682330000   | 980785000   |
| Microtubule-associated protein RP/EB family member 3                     | <i>Mapre3</i>      | 1.06 | Down | 2777875000  | 2941950000  |
| Microtubule-associated protein tau                                       | <i>Mapt</i>        | 1.19 | Down | 2321250000  | 2772675000  |
| Microtubule-associated proteins 1A/1B light chain 3A                     | <i>Map1lc3a</i>    | 1.02 | Up   | 1513850000  | 1480325000  |
| Microtubule-associated proteins 1A/1B light chain 3B                     | <i>Map1lc3b</i>    | 1.07 | Down | 669770000   | 718927500   |
| Misshapen-like kinase 1                                                  | <i>Mink1</i>       | 1.17 | Down | 97424500    | 113510000   |
| Mitochondrial 2-oxoglutarate/malate carrier protein                      | <i>Slc25a11</i>    | 1.27 | Up   | 1342925000  | 1055355000  |
| Mitochondrial amidoxime reducing component 2                             | <i>Marc-2</i>      | 1.11 | Down | 113613333.3 | 126490000   |
| Mitochondrial antiviral-signaling protein                                | <i>Mavs</i>        | 1.38 | Down | 84098000    | 115773333.3 |
| Mitochondrial carnitine/acylcarnitine carrier protein                    | <i>Slc25a20</i>    | 1.37 | Up   | 238892500   | 174215000   |
| Mitochondrial fission 1 protein                                          | <i>Fis1</i>        | 1.23 | Up   | 951905000   | 771585000   |
| Mitochondrial glutamate carrier 2                                        | <i>Slc25a18</i>    | 1.05 | Up   | 1033696667  | 980795000   |
| Mitochondrial import inner membrane translocase subunit Tim13            | <i>Timm13</i>      | 1.33 | Up   | 183543333.3 | 138323333.3 |
| Mitochondrial import inner membrane translocase subunit TIM44            | <i>Timm44</i>      | 1.16 | Up   | 223146666.7 | 192712500   |
| Mitochondrial import inner membrane translocase subunit Tim9             | <i>Timm9</i>       | 1.22 | Down | 171650000   | 209560000   |
| Mitochondrial import receptor subunit TOM22 homolog                      | <i>Tomm22</i>      | 1.02 | Up   | 467410000   | 456870000   |
| Mitochondrial import receptor subunit TOM34                              | <i>Tomm34</i>      | 1.06 | Down | 81306666.67 | 86036333.33 |
| Mitochondrial import receptor subunit TOM40 homolog                      | <i>Tomm40</i>      | 1.46 | Up   | 297047500   | 202850000   |
| Mitochondrial import receptor subunit TOM70                              | <i>Tomm70a</i>     | 1.04 | Down | 2242750000  | 2325525000  |
| Mitochondrial peptide methionine sulfoxide reductase                     | <i>Msra</i>        | 1.18 | Up   | 254613333.3 | 215870000   |
| Mitochondrial pyruvate carrier 1                                         | <i>Mpc1</i>        | 2.28 | Up   | 796500000   | 348980000   |
| Mitochondrial pyruvate carrier 2                                         | <i>Mpc2</i>        | 1.02 | Down | 230847500   | 234632500   |
| Mitochondrial Rho GTPase 2                                               | <i>Rhot2</i>       | 1.15 | Up   | 1319100000  | 1143925000  |
| Mitofusin-2                                                              | <i>Mfn2</i>        | 1.13 | Up   | 190307500   | 168152500   |
| Mitogen-activated protein kinase 1                                       | <i>Mapk1</i>       | 1.01 | Up   | 4056425000  | 3998650000  |
| Mitogen-activated protein kinase 3                                       | <i>Mapk3</i>       | 1.00 | Up   | 1296077500  | 1292500000  |
| Mitogen-activated protein kinase 9;Mitogen-activated protein kinase 8    | <i>Mapk9;Mapk8</i> | 1.14 | Down | 192187500   | 218172500   |
| MOB-like protein phocein                                                 | <i>Mob4</i>        | 1.02 | Up   | 109010000   | 107277666.7 |
| Moesin                                                                   | <i>Msn</i>         | 1.02 | Down | 3197925000  | 3259375000  |

|                                                                                                                                |                          |      |      |            |             |
|--------------------------------------------------------------------------------------------------------------------------------|--------------------------|------|------|------------|-------------|
| Monoacylglycerol lipase ABHD12                                                                                                 | <i>Abhd12</i>            | 1.00 | Up   | 541587500  | 540372500   |
| Monoacylglycerol lipase ABHD6                                                                                                  | <i>Abhd6</i>             | 1.31 | Up   | 190540000  | 145712500   |
| Monocarboxylate transporter 1                                                                                                  | <i>Slc16a1</i>           | 1.46 | Up   | 930032500  | 635025000   |
| Monoglyceride lipase                                                                                                           | <i>Mgll</i>              | 1.05 | Up   | 1162837500 | 1106025000  |
| mRNA cap guanine-N7 methyltransferase                                                                                          | <i>Rnmt</i>              | 1.12 | Up   | 637070000  | 566705000   |
| Multidrug resistance protein 1;Multidrug resistance protein 3                                                                  | <i>Abcb1;Abcb4</i>       | 1.03 | Down | 45812000   | 47024000    |
| Multifunctional protein ADE2;Phosphoribosylaminoimidazole-succinocarboxamide synthase;Phosphoribosylaminoimidazole carboxylase | <i>Paics</i>             | 1.12 | Up   | 632227500  | 566955000   |
| Murinoglobulin-1                                                                                                               | <i>Mug1</i>              | 1.26 | Up   | 101826000  | 80973000    |
| Muscleblind-like protein 2                                                                                                     | <i>Mbnl2</i>             | 1.05 | Up   | 225252500  | 213955000   |
| Myb-binding protein 1A                                                                                                         | <i>Mybbp1a</i>           | 1.07 | Up   | 257660000  | 241562500   |
| Myc box-dependent-interacting protein 1                                                                                        | <i>Bin1</i>              | 1.07 | Up   | 2433775000 | 2279275000  |
| Mycophenolic acid acyl-glucuronide esterase, mitochondrial                                                                     | <i>Abhd10</i>            | 1.04 | Down | 601600000  | 627205000   |
| Myocyte-specific enhancer factor 2D                                                                                            | <i>Mef2d</i>             | 1.16 | Down | 144192500  | 167382500   |
| Myosin light polypeptide 6                                                                                                     | <i>Myl6</i>              | 1.14 | Down | 537167500  | 611620000   |
| Myosin regulatory light chain 12B;Myosin regulatory light chain RLC-A;Myosin regulatory light polypeptide 9                    | <i>Myl12b;Rlc-a;Myl9</i> | 1.14 | Down | 269240000  | 308247500   |
| Myosin-10                                                                                                                      | <i>Myh10</i>             | 1.02 | Up   | 968467500  | 949935000   |
| Myosin-9                                                                                                                       | <i>Myh9</i>              | 1.06 | Up   | 334707500  | 316377500   |
| Myotrophin                                                                                                                     | <i>Mtpn</i>              | 1.02 | Down | 503385000  | 512265000   |
| Myristoylated alanine-rich C-kinase substrate                                                                                  | <i>Marcks</i>            | 2.47 | Up   | 1760595000 | 713300000   |
| N(G),N(G)-dimethylarginine dimethylaminohydrolase 1                                                                            | <i>Ddah1</i>             | 1.09 | Up   | 1622050000 | 1481400000  |
| N(G),N(G)-dimethylarginine dimethylaminohydrolase 2                                                                            | <i>Ddah2</i>             | 1.08 | Up   | 5913325000 | 5498725000  |
| Na(+)/H(+) exchange regulatory cofactor NHE-RF1                                                                                | <i>Slc9a3r1</i>          | 1.00 | Up   | 458587500  | 457092500   |
| N-acetyl-D-glucosamine kinase                                                                                                  | <i>Nagk</i>              | 1.20 | Down | 48486500   | 58356333.33 |
| N-acetylgalactosamine kinase                                                                                                   | <i>Galk2</i>             | 1.01 | Down | 98739000   | 99937000    |
| N-acylneuramate cytidyltransferase                                                                                             | <i>Cmas</i>              | 1.14 | Down | 515305000  | 589610000   |
| NAD kinase 2, mitochondrial                                                                                                    | <i>Nadk2</i>             | 1.04 | Down | 385832500  | 402717500   |
| NAD(P)H dehydrogenase [quinone] 1                                                                                              | <i>Nqo1</i>              | 1.48 | Down | 53623500   | 79525500    |
| NAD(P)H-hydrate epimerase                                                                                                      | <i>Apoa1bp</i>           | 1.02 | Down | 855900000  | 872240000   |
| NAD-dependent protein deacetylase sirtuin-2                                                                                    | <i>Sirt2</i>             | 1.01 | Down | 915137500  | 922140000   |
| NAD-dependent protein deacylase sirtuin-5, mitochondrial                                                                       | <i>Sirt5</i>             | 1.88 | Up   | 172790000  | 91968666.67 |
| NADH dehydrogenase [ubiquinone] 1 alpha subcomplex subunit 10, mitochondrial                                                   | <i>Ndufa10</i>           | 1.11 | Down | 3027750000 | 3373000000  |
| NADH dehydrogenase [ubiquinone] 1 alpha subcomplex subunit 11                                                                  | <i>Ndufa11</i>           | 1.42 | Down | 378237500  | 537390000   |
| NADH dehydrogenase [ubiquinone] 1 alpha subcomplex subunit 5                                                                   | <i>Ndufa5</i>            | 1.26 | Up   | 802457500  | 638547500   |
| NADH dehydrogenase [ubiquinone] 1 alpha subcomplex subunit 9, mitochondrial                                                    | <i>Ndufa9</i>            | 1.03 | Down | 2073675000 | 2133925000  |
| NADH dehydrogenase [ubiquinone] flavoprotein 2, mitochondrial                                                                  | <i>Ndufv2</i>            | 1.05 | Up   | 876885000  | 832072500   |
| NADH dehydrogenase [ubiquinone] iron-sulfur protein 2, mitochondrial                                                           | <i>Ndufs2</i>            | 1.00 | Down | 3406550000 | 3416850000  |
| NADH dehydrogenase [ubiquinone] iron-sulfur protein 4, mitochondrial                                                           | <i>Ndufs4</i>            | 1.03 | Up   | 710217500  | 688227500   |
| NADH dehydrogenase [ubiquinone] iron-sulfur protein 6, mitochondrial                                                           | <i>Ndufs6</i>            | 1.39 | Down | 588817500  | 815757500   |
| NADH-cytochrome b5 reductase 1                                                                                                 | <i>Cyb5r1</i>            | 1.02 | Up   | 919035000  | 902275000   |

|                                                                                                                               |                |      |      |             |             |
|-------------------------------------------------------------------------------------------------------------------------------|----------------|------|------|-------------|-------------|
| NADH-cytochrome b5 reductase 3;NADH-cytochrome b5 reductase 3 membrane-bound form;NADH-cytochrome b5 reductase 3 soluble form | <i>Cyb5r3</i>  | 1.04 | Up   | 532020000   | 512635000   |
| NADH-ubiquinone oxidoreductase 75 kDa subunit, mitochondrial                                                                  | <i>Ndufs1</i>  | 1.00 | Down | 8101600000  | 8134650000  |
| NADH-ubiquinone oxidoreductase chain 1                                                                                        | <i>Mtnd1</i>   | 1.05 | Up   | 298100000   | 284315000   |
| NADH-ubiquinone oxidoreductase chain 4                                                                                        | <i>Mtnd4</i>   | 1.08 | Down | 525252500   | 569520000   |
| NADH-ubiquinone oxidoreductase chain 5                                                                                        | <i>Mtnd5</i>   | 1.01 | Up   | 427002500   | 424805000   |
| NADPH--cytochrome P450 reductase                                                                                              | <i>Por</i>     | 1.03 | Up   | 1084940000  | 1053685000  |
| N-alpha-acetyltransferase 25, NatB auxiliary subunit                                                                          | <i>Naa25</i>   | 1.25 | Down | 42191000    | 52694000    |
| Nardilysin                                                                                                                    | <i>Nrd1</i>    | 1.02 | Down | 310255000   | 316890000   |
| Nck-associated protein 1                                                                                                      | <i>Nckap1</i>  | 1.07 | Up   | 1163925000  | 1084960000  |
| NEDD8                                                                                                                         | <i>Nedd8</i>   | 1.11 | Up   | 226593333.3 | 204710000   |
| NEDD8-activating enzyme E1 catalytic subunit                                                                                  | <i>Uba3</i>    | 1.08 | Up   | 594137500   | 550572500   |
| NEDD8-activating enzyme E1 regulatory subunit                                                                                 | <i>Nae1</i>    | 1.00 | Up   | 467112500   | 466367500   |
| Neogenin                                                                                                                      | <i>Neo1</i>    | 1.48 | Up   | 127860000   | 86328333.33 |
| Neurabin-2                                                                                                                    | <i>Ppp1r9b</i> | 1.13 | Down | 80872000    | 91412333.33 |
| Neural cell adhesion molecule 1                                                                                               | <i>Ncam1</i>   | 1.05 | Up   | 22134250000 | 21107500000 |
| Neural cell adhesion molecule L1                                                                                              | <i>L1cam</i>   | 1.09 | Down | 275512500   | 300572500   |
| Neural Wiskott-Aldrich syndrome protein                                                                                       | <i>Wasl</i>    | 1.14 | Up   | 77079000    | 67454333.33 |
| Neurexin-2                                                                                                                    | <i>Nrxn2</i>   | 1.44 | Up   | 30077000    | 20940000    |
| Neurexin-3                                                                                                                    | <i>Nrxn3</i>   | 1.02 | Up   | 736855000   | 720675000   |
| Neurocalcin-delta                                                                                                             | <i>Ncald</i>   | 1.12 | Down | 254200000   | 285667500   |
| Neurochondrin                                                                                                                 | <i>Ncdn</i>    | 1.02 | Down | 875472500   | 891115000   |
| Neurofascin                                                                                                                   | <i>Nfasc</i>   | 1.01 | Down | 1757875000  | 1775750000  |
| Neurofibromin                                                                                                                 | <i>Nf1</i>     | 1.47 | Down | 68270666.67 | 100527333.3 |
| Neurofilament light polypeptide                                                                                               | <i>Nefl</i>    | 1.98 | Down | 545370000   | 1078150000  |
| Neurofilament medium polypeptide                                                                                              | <i>Nefm</i>    | 1.20 | Down | 136570000   | 163363333.3 |
| Neuroigin-2                                                                                                                   | <i>Nlgn2</i>   | 1.03 | Down | 245640000   | 252930000   |
| Neuroigin-3                                                                                                                   | <i>Nlgn3</i>   | 1.04 | Up   | 275516666.7 | 263877500   |
| Neurolysin, mitochondrial                                                                                                     | <i>Nln</i>     | 1.44 | Up   | 94494000    | 65501000    |
| Neuronal calcium sensor 1                                                                                                     | <i>Ncs1</i>    | 1.79 | Down | 42340000    | 75598000    |
| Neuronal cell adhesion molecule                                                                                               | <i>Nrcam</i>   | 1.12 | Up   | 745157500   | 666162500   |
| Neuronal growth regulator 1                                                                                                   | <i>Negr1</i>   | 1.10 | Up   | 1082662500  | 982225000   |
| Neuronal membrane glycoprotein M6-a                                                                                           | <i>Gpm6a</i>   | 1.24 | Up   | 3860850000  | 3113300000  |
| Neuronal membrane glycoprotein M6-b                                                                                           | <i>Gpm6b</i>   | 1.21 | Up   | 1238232500  | 1023492500  |
| Neuronal migration protein doublecortin                                                                                       | <i>Dcx</i>     | 1.09 | Down | 185740000   | 202645000   |
| Neuronal-specific septin-3                                                                                                    | <i>Sep--3</i>  | 1.08 | Down | 848425000   | 913747500   |
| Neuron-specific calcium-binding protein hippocalcin                                                                           | <i>Hpca</i>    | 1.04 | Up   | 537697500   | 516410000   |
| Neuroplastin                                                                                                                  | <i>Nptn</i>    | 1.02 | Down | 2485100000  | 2536950000  |
| Neurotrimin                                                                                                                   | <i>Ntm</i>     | 1.06 | Down | 1164640000  | 1234250000  |
| Neutral cholesterol ester hydrolase 1                                                                                         | <i>Nceh1</i>   | 1.04 | Up   | 522795000   | 500587500   |
| NHP2-like protein 1;NHP2-like protein 1, N-terminally processed                                                               | <i>Nhp2l1</i>  | 1.15 | Down | 541045000   | 623755000   |
| Niban-like protein 1                                                                                                          | <i>Fam129b</i> | 1.25 | Up   | 137886666.7 | 110150000   |
| Nicalin                                                                                                                       | <i>Ncln</i>    | 1.15 | Down | 148613333.3 | 171452500   |
| Nicotinamide phosphoribosyltransferase                                                                                        | <i>Nampt</i>   | 1.01 | Down | 353320000   | 355360000   |
| Ninjurin-1                                                                                                                    | <i>Ninj1</i>   | 1.11 | Up   | 12808300    | 11497600    |
| Nischarin                                                                                                                     | <i>Nisch</i>   | 1.03 | Up   | 206256666.7 | 201090000   |
| NLR family member X1                                                                                                          | <i>NlrX1</i>   | 1.13 | Up   | 148370000   | 131865000   |
| NmrA-like family domain-containing protein 1                                                                                  | <i>Nmral1</i>  | 1.13 | Down | 379520000   | 427590000   |
| Non-histone chromosomal protein HMG-17                                                                                        | <i>Hmgcn2</i>  | 1.51 | Down | 316087500   | 476235000   |
| Non-lysosomal glucosylceramidase                                                                                              | <i>Gba2</i>    | 1.09 | Up   | 104305000   | 96024333.33 |
| Non-muscle caldesmon                                                                                                          | <i>Cald1</i>   | 1.25 | Down | 86457500    | 108425500   |
| Non-POU domain-containing octamer-binding protein                                                                             | <i>Nono</i>    | 1.04 | Down | 2892200000  | 3000775000  |

|                                                                                                             |                 |      |      |             |             |
|-------------------------------------------------------------------------------------------------------------|-----------------|------|------|-------------|-------------|
| Non-specific lipid-transfer protein                                                                         | <i>Scp2</i>     | 1.03 | Down | 749987500   | 773745000   |
| NSFL1 cofactor p47                                                                                          | <i>Nsfl1c</i>   | 1.08 | Up   | 1115677500  | 1035252500  |
| N-terminal EF-hand calcium-binding protein 1                                                                | <i>Necab1</i>   | 1.23 | Down | 48583000    | 59832666.67 |
| Nuclear cap-binding protein subunit 1                                                                       | <i>Ncbp1</i>    | 1.01 | Up   | 644337500   | 637490000   |
| Nuclear migration protein nudC                                                                              | <i>Nudc</i>     | 1.18 | Down | 878617500   | 1039625000  |
| Nuclear pore complex protein Nup155                                                                         | <i>Nup155</i>   | 1.20 | Down | 206326666.7 | 247440000   |
| Nuclear pore complex protein Nup54                                                                          | <i>Nup54</i>    | 1.25 | Down | 89275500    | 111365000   |
| Nuclear pore complex protein Nup93                                                                          | <i>Nup93</i>    | 1.42 | Down | 141062500   | 200740000   |
| Nuclear transport factor 2                                                                                  | <i>Nutf2</i>    | 1.07 | Up   | 772705000   | 720110000   |
| Nucleobindin-1                                                                                              | <i>Nucb1</i>    | 1.13 | Down | 129796666.7 | 146867500   |
| Nucleolar and coiled-body phosphoprotein 1                                                                  | <i>Nolc1</i>    | 1.22 | Down | 34645333.33 | 42272333.33 |
| Nucleolar protein 58                                                                                        | <i>Nop58</i>    | 1.01 | Down | 289800000   | 292820000   |
| Nucleolar RNA helicase 2                                                                                    | <i>Ddx21</i>    | 1.44 | Up   | 184882500   | 128545000   |
| Nucleolin                                                                                                   | <i>Ncl</i>      | 1.08 | Up   | 6253225000  | 5775675000  |
| Nucleophosmin                                                                                               | <i>Npm1</i>     | 1.06 | Up   | 3048100000  | 2889125000  |
| Nucleoporin NUP53                                                                                           | <i>Nup35</i>    | 1.84 | Down | 61615000    | 113388666.7 |
| Nucleoprotein TPR                                                                                           | <i>Tpr</i>      | 1.54 | Down | 393040000   | 606462500   |
| Nucleoside diphosphate kinase A                                                                             | <i>Nme1</i>     | 1.01 | Down | 7847075000  | 7895375000  |
| Nucleoside diphosphate kinase B                                                                             | <i>Nme2</i>     | 1.04 | Up   | 1252555000  | 1200225000  |
| Nucleosome assembly protein 1-like 1                                                                        | <i>Nap1l1</i>   | 1.10 | Up   | 1020265000  | 929487500   |
| Nucleosome assembly protein 1-like 4                                                                        | <i>Nap1l4</i>   | 1.02 | Down | 746545000   | 762087500   |
| NudC domain-containing protein 2                                                                            | <i>Nudcd2</i>   | 2.07 | Up   | 85053333.33 | 41075000    |
| O-acetyl-ADP-ribose deacetylase MACROD1                                                                     | <i>Macrold1</i> | 1.15 | Up   | 245497500   | 213795000   |
| Obg-like ATPase 1                                                                                           | <i>Ola1</i>     | 1.14 | Up   | 1292010000  | 1137985000  |
| OCIA domain-containing protein 1                                                                            | <i>Ociad1</i>   | 1.08 | Down | 242795000   | 261737500   |
| Omega-amidase NIT2                                                                                          | <i>Nit2</i>     | 1.09 | Down | 549477500   | 598920000   |
| Opioid growth factor receptor                                                                               | <i>Ogfr</i>     | 1.32 | Down | 39192000    | 51731000    |
| Optineurin                                                                                                  | <i>Optn</i>     | 1.21 | Down | 57419000    | 69396333.33 |
| Ornithine aminotransferase, mitochondrial                                                                   | <i>Oat</i>      | 1.01 | Up   | 2432300000  | 2409175000  |
| Osteoclast-stimulating factor 1                                                                             | <i>Ostf1</i>    | 1.13 | Down | 34530500    | 38914000    |
| OX-2 membrane glycoprotein                                                                                  | <i>Cd200</i>    | 1.04 | Down | 497602500   | 516742500   |
| Oxidation resistance protein 1                                                                              | <i>Oxr1</i>     | 1.10 | Up   | 1351450000  | 1229575000  |
| Oxygen-dependent coproporphyrinogen-III oxidase, mitochondrial                                              | <i>Cpox</i>     | 1.05 | Up   | 179945000   | 171033333.3 |
| Oxysterol-binding protein-related protein 1                                                                 | <i>Osbpl1a</i>  | 1.29 | Up   | 196576666.7 | 152165000   |
| Palmitoyl-protein thioesterase 1                                                                            | <i>Ppt1</i>     | 1.05 | Up   | 1171407500  | 1112425000  |
| Pantothenate kinase 4                                                                                       | <i>Pank4</i>    | 1.16 | Up   | 223960000   | 193767500   |
| Parafibromin                                                                                                | <i>Cdc73</i>    | 1.23 | Down | 84347000    | 104102000   |
| Paralemmin-1                                                                                                | <i>Palm</i>     | 1.20 | Down | 508286666.7 | 609970000   |
| Paraspeckle component 1                                                                                     | <i>Pspc1</i>    | 1.02 | Up   | 1464525000  | 1441975000  |
| Parvalbumin alpha                                                                                           | <i>Pvalb</i>    | 1.26 | Down | 951177500   | 1196862500  |
| Paxillin                                                                                                    | <i>Pxn</i>      | 1.08 | Up   | 25879000    | 23907000    |
| PC4 and SFRS1-interacting protein                                                                           | <i>Psip1</i>    | 1.07 | Down | 1739625000  | 1854550000  |
| PDZ and LIM domain protein 5                                                                                | <i>Pdlim5</i>   | 1.13 | Down | 275865000   | 311052500   |
| PDZ domain-containing protein GIPC1                                                                         | <i>Gipc1</i>    | 1.09 | Down | 56194000    | 61357666.67 |
| Peflin                                                                                                      | <i>Pef1</i>     | 1.10 | Up   | 244060000   | 222200000   |
| Peptidyl-prolyl cis-trans isomerase A;Peptidyl-prolyl cis-trans isomerase A, N-terminally processed         | <i>Ppia</i>     | 1.04 | Up   | 39240500000 | 37766250000 |
| Peptidyl-prolyl cis-trans isomerase B                                                                       | <i>Ppib</i>     | 1.02 | Down | 2237875000  | 2274025000  |
| Peptidyl-prolyl cis-trans isomerase D                                                                       | <i>Ppid</i>     | 1.01 | Up   | 2376800000  | 2349775000  |
| Peptidyl-prolyl cis-trans isomerase F, mitochondrial                                                        | <i>Ppif</i>     | 1.68 | Down | 49242000    | 82583000    |
| Peptidyl-prolyl cis-trans isomerase FKBP1A                                                                  | <i>Fkbp1a</i>   | 1.15 | Up   | 889387500   | 771187500   |
| Peptidyl-prolyl cis-trans isomerase FKBP4;Peptidyl-prolyl cis-trans isomerase FKBP4, N-terminally processed | <i>Fkbp4</i>    | 1.03 | Down | 2177175000  | 2239400000  |
| Peptidyl-prolyl cis-trans isomerase FKBP8                                                                   | <i>Fkbp8</i>    | 1.43 | Up   | 366880000   | 255950000   |

|                                                                                                                             |                |      |      |             |             |
|-----------------------------------------------------------------------------------------------------------------------------|----------------|------|------|-------------|-------------|
| Peripheral plasma membrane protein CASK                                                                                     | <i>Cask</i>    | 1.04 | Down | 807730000   | 838217500   |
| Peripherin-2                                                                                                                | <i>Prph2</i>   | 1.11 | Up   | 4867375000  | 4386950000  |
| Peroxiredoxin-1                                                                                                             | <i>Prdx1</i>   | 1.04 | Up   | 10496625000 | 10096825000 |
| Peroxiredoxin-2                                                                                                             | <i>Prdx2</i>   | 1.05 | Up   | 15367500000 | 14621000000 |
| Peroxiredoxin-4                                                                                                             | <i>Prdx4</i>   | 1.02 | Down | 1665866667  | 1701650000  |
| Peroxiredoxin-5, mitochondrial                                                                                              | <i>Prdx5</i>   | 1.07 | Up   | 6655500000  | 6232075000  |
| Peroxiredoxin-6                                                                                                             | <i>Prdx6</i>   | 1.09 | Up   | 4013600000  | 3688525000  |
| Peroxisomal biogenesis factor 19                                                                                            | <i>Pex19</i>   | 1.74 | Up   | 42736000    | 24579000    |
| Peroxisomal carnitine O-octanoyltransferase                                                                                 | <i>Crot</i>    | 1.02 | Up   | 90828000    | 88717000    |
| Peroxisomal membrane protein PEX14                                                                                          | <i>Pex14</i>   | 1.64 | Up   | 101900000   | 62250000    |
| Peroxisomal multifunctional enzyme type 2;(3R)-hydroxyacyl-CoA dehydrogenase;Enoyl-CoA hydratase 2                          | <i>Hsd17b4</i> | 1.02 | Down | 926407500   | 943955000   |
| PHD finger-like domain-containing protein 5A                                                                                | <i>Phf5a</i>   | 1.23 | Up   | 273633333.3 | 221690000   |
| Phenylalanine--tRNA ligase alpha subunit                                                                                    | <i>Farsa</i>   | 1.12 | Up   | 520910000   | 464580000   |
| Phosducin                                                                                                                   | <i>Pdc</i>     | 1.07 | Down | 10900025000 | 11700500000 |
| Phosphate carrier protein, mitochondrial                                                                                    | <i>Slc25a3</i> | 1.09 | Up   | 18515000000 | 17063250000 |
| Phosphatidate cytidylyltransferase 1                                                                                        | <i>Cds1</i>    | 1.12 | Up   | 983665000   | 877062500   |
| Phosphatidate cytidylyltransferase 2                                                                                        | <i>Cds2</i>    | 1.34 | Up   | 1115240000  | 834277500   |
| Phosphatidylethanolamine-binding protein 1;Hippocampal cholinergic neurostimulating peptide                                 | <i>Pebp1</i>   | 1.03 | Up   | 23893000000 | 23255750000 |
| Phosphatidylinositide phosphatase SAC1                                                                                      | <i>Sacm1l</i>  | 1.09 | Up   | 881262500   | 811245000   |
| Phosphatidylinositol 4-kinase alpha                                                                                         | <i>Pi4ka</i>   | 1.01 | Up   | 832437500   | 822437500   |
| Phosphatidylinositol 4-phosphate 5-kinase type-1 gamma                                                                      | <i>Pip5k1c</i> | 1.04 | Up   | 518985000   | 500840000   |
| Phosphatidylinositol 5-phosphate 4-kinase type-2 alpha                                                                      | <i>Pip4k2a</i> | 1.46 | Down | 222002500   | 324627500   |
| Phosphatidylinositol 5-phosphate 4-kinase type-2 beta                                                                       | <i>Pip4k2b</i> | 1.01 | Down | 302567500   | 306692500   |
| Phosphatidylinositol 5-phosphate 4-kinase type-2 gamma                                                                      | <i>Pip4k2c</i> | 1.24 | Down | 110366000   | 137370000   |
| Phosphatidylinositol transfer protein alpha isoform                                                                         | <i>Pitpna</i>  | 1.04 | Down | 3247025000  | 3376375000  |
| Phosphatidylinositol transfer protein beta isoform                                                                          | <i>Pitpnb</i>  | 1.20 | Up   | 188926666.7 | 157795000   |
| Phosphatidylinositol-binding clathrin assembly protein                                                                      | <i>Picalm</i>  | 1.05 | Down | 259580000   | 272107500   |
| Phosphatidylserine synthase 2                                                                                               | <i>Ptdss2</i>  | 1.31 | Up   | 179525000   | 136620000   |
| Phosphofurin acidic cluster sorting protein 1                                                                               | <i>Pacs1</i>   | 1.07 | Up   | 650940000   | 608555000   |
| Phosphoglucomutase-1                                                                                                        | <i>Pgm1</i>    | 1.05 | Up   | 4730050000  | 4490350000  |
| Phosphoglycerate kinase 1                                                                                                   | <i>Pgk1</i>    | 1.03 | Up   | 66919750000 | 64806750000 |
| Phosphoglycerate mutase 1                                                                                                   | <i>Pgam1</i>   | 1.02 | Down | 46590250000 | 47476250000 |
| Phospholipase A-2-activating protein                                                                                        | <i>Plaa</i>    | 1.06 | Up   | 516702500   | 489265000   |
| Phospholipase D3                                                                                                            | <i>Pld3</i>    | 1.03 | Up   | 194367500   | 189055000   |
| Phospholipid hydroperoxide glutathione peroxidase, mitochondrial;Phospholipid hydroperoxide glutathione peroxidase, nuclear | <i>Gpx4</i>    | 1.99 | Up   | 1290360000  | 647730000   |
| Phospholysine phosphohistidine inorganic pyrophosphate phosphatase                                                          | <i>Lhpp</i>    | 1.00 | Up   | 162775000   | 162226666.7 |
| Phosphoribosyl pyrophosphate synthase-associated protein 1                                                                  | <i>Prpsap1</i> | 1.24 | Up   | 227710000   | 184147500   |
| Phosphoribosyl pyrophosphate synthase-associated protein 2                                                                  | <i>Prpsap2</i> | 1.10 | Up   | 1204050000  | 1094590000  |
| Phosphoserine phosphatase                                                                                                   | <i>Psph</i>    | 1.03 | Up   | 409507500   | 396000000   |
| Phytanoyl-CoA hydroxylase-interacting protein-like                                                                          | <i>Phyhipl</i> | 1.01 | Down | 1120167500  | 1136250000  |
| Pirin                                                                                                                       | <i>Pir</i>     | 1.14 | Down | 367377500   | 419270000   |

|                                                                                                                                                               |                    |      |      |            |             |
|---------------------------------------------------------------------------------------------------------------------------------------------------------------|--------------------|------|------|------------|-------------|
| Plasma membrane calcium-transporting ATPase 1                                                                                                                 | <i>Atp2b1</i>      | 1.06 | Down | 7239875000 | 7661550000  |
| Plasma membrane calcium-transporting ATPase 2                                                                                                                 | <i>Atp2b2</i>      | 1.33 | Up   | 682900000  | 512100000   |
| Plasma membrane calcium-transporting ATPase 3                                                                                                                 | <i>Atp2b3</i>      | 1.05 | Down | 205330000  | 215202500   |
| Plasma membrane calcium-transporting ATPase 4                                                                                                                 | <i>Atp2b4</i>      | 1.23 | Up   | 228602500  | 185826666.7 |
| Plasminogen activator inhibitor 1 RNA-binding protein;Plasminogen activator inhibitor 1 RNA-binding protein, N-terminally processed                           | <i>Serbp1</i>      | 1.49 | Up   | 481907500  | 322722500   |
| Plastin-3                                                                                                                                                     | <i>Pls3</i>        | 1.03 | Up   | 351340000  | 342590000   |
| Platelet-activating factor acetylhydrolase IB subunit alpha                                                                                                   | <i>Pafah1b1</i>    | 1.04 | Down | 2787575000 | 2896425000  |
| Platelet-activating factor acetylhydrolase IB subunit beta                                                                                                    | <i>Pafah1b2</i>    | 1.11 | Up   | 2671325000 | 2415375000  |
| Platelet-activating factor acetylhydrolase IB subunit gamma                                                                                                   | <i>Pafah1b3</i>    | 1.06 | Down | 1082735000 | 1145700000  |
| Plectin                                                                                                                                                       | <i>Plec</i>        | 1.71 | Down | 554365000  | 949052500   |
| Pleiotropic regulator 1                                                                                                                                       | <i>Plrg1</i>       | 1.25 | Down | 225547500  | 282270000   |
| Podocalyxin                                                                                                                                                   | <i>Podxl</i>       | 2.08 | Up   | 119540500  | 57478000    |
| Poly [ADP-ribose] polymerase 1                                                                                                                                | <i>Parp1</i>       | 1.06 | Up   | 104040750  | 97950000    |
| Poly(U)-binding-splicing factor PUF60                                                                                                                         | <i>Puf60</i>       | 1.01 | Up   | 590407500  | 582837500   |
| Polyadenylate-binding protein 1                                                                                                                               | <i>Pabpc1</i>      | 1.02 | Up   | 4488575000 | 4415600000  |
| Polyamine-modulated factor 1-binding protein 1                                                                                                                | <i>Pmfbp1</i>      | 2.49 | Up   | 755560000  | 302990000   |
| Polymerase I and transcript release factor                                                                                                                    | <i>Ptrf</i>        | 1.08 | Down | 227135000  | 246232500   |
| Polypyrimidine tract-binding protein 1                                                                                                                        | <i>Ptbp1</i>       | 1.10 | Down | 480707500  | 526535000   |
| Polypyrimidine tract-binding protein 2                                                                                                                        | <i>Ptbp2</i>       | 1.05 | Down | 2037625000 | 2130300000  |
| Potassium voltage-gated channel subfamily B member 1                                                                                                          | <i>Kcnb1</i>       | 1.05 | Up   | 419220000  | 400907500   |
| Potassium voltage-gated channel subfamily C member 1                                                                                                          | <i>Kcnc1</i>       | 1.29 | Up   | 84663000   | 65568000    |
| Potassium voltage-gated channel subfamily D member 3;Potassium voltage-gated channel subfamily D member 2                                                     | <i>Kcnd3;Kcnd2</i> | 1.37 | Up   | 38383000   | 28107000    |
| Potassium/sodium hyperpolarization-activated cyclic nucleotide-gated channel 1;Potassium/sodium hyperpolarization-activated cyclic nucleotide-gated channel 2 | <i>Hcn1;Hcn2</i>   | 1.05 | Down | 93197000   | 97808666.67 |
| PRA1 family protein 3                                                                                                                                         | <i>Arl6ip5</i>     | 1.08 | Up   | 665080000  | 613415000   |
| Prefoldin subunit 2                                                                                                                                           | <i>Pfdn2</i>       | 1.05 | Down | 230910000  | 243370000   |
| Prelamin-A/C;Lamin-A/C                                                                                                                                        | <i>Lmna</i>        | 3.58 | Down | 341547500  | 1222425000  |
| Pre-mRNA-processing factor 19                                                                                                                                 | <i>Prpf19</i>      | 1.09 | Down | 1945900000 | 2124950000  |
| Pre-mRNA-processing factor 6                                                                                                                                  | <i>Prpf6</i>       | 1.25 | Down | 237737500  | 296080000   |
| Prenylcysteine oxidase                                                                                                                                        | <i>Pcyox1</i>      | 1.01 | Down | 1174602500 | 1180575000  |
| Probable 2-oxoglutarate dehydrogenase E1 component DHKTD1, mitochondrial                                                                                      | <i>Dhtkd1</i>      | 1.51 | Down | 35048500   | 52998000    |
| Probable ATP-dependent RNA helicase DDX46                                                                                                                     | <i>Ddx46</i>       | 1.19 | Up   | 86621000   | 73016500    |
| Probable tRNA N6-adenosine threonylcarbamoyltransferase                                                                                                       | <i>Osgep</i>       | 1.05 | Up   | 821992500  | 784485000   |
| Profilin-1                                                                                                                                                    | <i>Pfn1</i>        | 1.23 | Down | 3765925000 | 4632450000  |
| Profilin-2                                                                                                                                                    | <i>Pfn2</i>        | 1.00 | Up   | 1105150000 | 1103732500  |
| Programmed cell death 6-interacting protein                                                                                                                   | <i>Pdcd6ip</i>     | 1.01 | Up   | 1154432500 | 1142300000  |
| Programmed cell death protein 10                                                                                                                              | <i>Pdcd10</i>      | 1.08 | Down | 155300000  | 168080000   |
| Prohibitin                                                                                                                                                    | <i>Phb</i>         | 1.09 | Up   | 3456250000 | 3163800000  |
| Prohibitin-2                                                                                                                                                  | <i>Phb2</i>        | 1.16 | Up   | 4155075000 | 3568350000  |
| Proliferation-associated protein 2G4                                                                                                                          | <i>Pa2g4</i>       | 1.02 | Up   | 2475900000 | 2415575000  |
| Prolyl endopeptidase                                                                                                                                          | <i>Prep</i>        | 1.01 | Down | 534547500  | 541962500   |
| Prolyl endopeptidase-like                                                                                                                                     | <i>Prepl</i>       | 1.08 | Down | 488957500  | 529537500   |

|                                                                            |                |      |      |             |             |
|----------------------------------------------------------------------------|----------------|------|------|-------------|-------------|
| Propionyl-CoA carboxylase alpha chain, mitochondrial                       | <i>Pcca</i>    | 1.10 | Down | 94450000    | 104328500   |
| Prosaposin receptor GPR37                                                  | <i>Gpr37</i>   | 2.10 | Up   | 671413333.3 | 319330000   |
| Prostaglandin E synthase 3                                                 | <i>Ptges3</i>  | 1.25 | Up   | 2511575000  | 2014825000  |
| Prostaglandin reductase 1                                                  | <i>Ptgr1</i>   | 1.08 | Up   | 2044300000  | 1897025000  |
| Prostaglandin reductase 2                                                  | <i>Ptgr2</i>   | 1.12 | Down | 922227500   | 1036045000  |
| Prostamide/prostaglandin F synthase                                        | <i>Fam213b</i> | 1.00 | Down | 136593333.3 | 136870000   |
| Proteasomal ubiquitin receptor ADRM1                                       | <i>Adrm1</i>   | 1.12 | Up   | 206947500   | 184720000   |
| Proteasome activator complex subunit 1                                     | <i>Psme1</i>   | 1.02 | Up   | 676907500   | 662377500   |
| Proteasome inhibitor PI31 subunit                                          | <i>Psmf1</i>   | 1.17 | Down | 148395000   | 173516666.7 |
| Proteasome subunit alpha type-1                                            | <i>Psma1</i>   | 1.23 | Up   | 1759800000  | 1427575000  |
| Proteasome subunit alpha type-2                                            | <i>Psma2</i>   | 1.18 | Up   | 1043697500  | 884835000   |
| Proteasome subunit alpha type-3                                            | <i>Psma3</i>   | 1.04 | Up   | 1107260000  | 1060402500  |
| Proteasome subunit alpha type-4                                            | <i>Psma4</i>   | 1.14 | Up   | 1438800000  | 1266175000  |
| Proteasome subunit alpha type-5                                            | <i>Psma5</i>   | 1.06 | Down | 1589950000  | 1678100000  |
| Proteasome subunit alpha type-6                                            | <i>Psma6</i>   | 1.12 | Up   | 2515050000  | 2253375000  |
| Proteasome subunit alpha type-7                                            | <i>Psma7</i>   | 1.01 | Down | 1466475000  | 1476350000  |
| Proteasome subunit beta type-1                                             | <i>Psmb1</i>   | 1.06 | Up   | 1702650000  | 1608625000  |
| Proteasome subunit beta type-2                                             | <i>Psmb2</i>   | 1.06 | Down | 1360275000  | 1443325000  |
| Proteasome subunit beta type-3                                             | <i>Psmb3</i>   | 1.02 | Down | 516677500   | 529585000   |
| Proteasome subunit beta type-4                                             | <i>Psmb4</i>   | 1.04 | Up   | 892165000   | 858800000   |
| Proteasome subunit beta type-5                                             | <i>Psmb5</i>   | 1.02 | Down | 1274695000  | 1299925000  |
| Proteasome subunit beta type-6                                             | <i>Psmb6</i>   | 1.13 | Up   | 1287175000  | 1137165000  |
| Proteasome subunit beta type-7                                             | <i>Psmb7</i>   | 1.04 | Down | 564902500   | 588460000   |
| Protein arginine N-methyltransferase 1                                     | <i>Prmt1</i>   | 1.08 | Up   | 1460475000  | 1353650000  |
| Protein argonaute-2                                                        | <i>Ago2</i>    | 1.06 | Up   | 942862500   | 888445000   |
| Protein bassoon                                                            | <i>Bsn</i>     | 1.16 | Down | 878947500   | 1019445000  |
| Protein BUD31 homolog                                                      | <i>Bud31</i>   | 2.88 | Down | 28350666.67 | 81558275    |
| Protein CutA                                                               | <i>Cuta</i>    | 1.09 | Up   | 151860000   | 138907500   |
| Protein deglycase DJ-1                                                     | <i>Park7</i>   | 1.02 | Down | 19528500000 | 19826000000 |
| Protein DEK                                                                | <i>Dek</i>     | 1.08 | Down | 1469175000  | 1586500000  |
| Protein disulfide-isomerase                                                | <i>P4hb</i>    | 1.00 | Up   | 3386525000  | 3375875000  |
| Protein disulfide-isomerase A3                                             | <i>Pdia3</i>   | 1.05 | Up   | 12080250000 | 11466750000 |
| Protein disulfide-isomerase A4                                             | <i>Pdia4</i>   | 1.05 | Down | 458390000   | 480350000   |
| Protein disulfide-isomerase A6                                             | <i>Pdia6</i>   | 1.12 | Up   | 1750825000  | 1558725000  |
| Protein ERGIC-53                                                           | <i>Lman1</i>   | 1.05 | Up   | 399817500   | 379477500   |
| Protein FAM136A                                                            | <i>Fam136a</i> | 1.35 | Up   | 119780000   | 88574666.67 |
| Protein FAM162A                                                            | <i>Fam162a</i> | 1.01 | Down | 422300000   | 428365000   |
| Protein farnesyltransferase subunit beta                                   | <i>Fntb</i>    | 1.29 | Down | 35225000    | 45482000    |
| Protein farnesyltransferase/geranylgeranyltransferase type-1 subunit alpha | <i>Fnta</i>    | 1.09 | Up   | 243746666.7 | 223062500   |
| Protein Hikeshi                                                            | <i>HIKESHI</i> | 2.18 | Down | 38476000    | 84060000    |
| Protein IMPACT                                                             | <i>Impact</i>  | 1.00 | Up   | 1171175000  | 1166300000  |
| Protein kinase C alpha type                                                | <i>Prkca</i>   | 1.07 | Up   | 3562300000  | 3336725000  |
| Protein kinase C and casein kinase substrate in neurons 2 protein          | <i>Pacsin2</i> | 1.16 | Down | 401567500   | 465940000   |
| Protein kinase C and casein kinase substrate in neurons protein 1          | <i>Pacsin1</i> | 1.04 | Down | 6257050000  | 6526125000  |
| Protein kinase C beta type                                                 | <i>Prkcb</i>   | 1.14 | Up   | 138233333.3 | 120790000   |
| Protein kinase C delta-binding protein                                     | <i>Prkcdbp</i> | 1.16 | Up   | 116170000   | 100139000   |
| Protein kinase C epsilon type                                              | <i>Prkce</i>   | 1.06 | Down | 399312500   | 423212500   |
| Protein lin-7 homolog A                                                    | <i>Lin7a</i>   | 1.25 | Down | 1179140000  | 1474957500  |
| Protein lin-7 homolog C                                                    | <i>Lin7c</i>   | 1.13 | Down | 593672500   | 670740000   |
| Protein LYRIC                                                              | <i>Mtdh</i>    | 1.11 | Up   | 156926666.7 | 141265000   |
| Protein MEMO1                                                              | <i>Memo1</i>   | 1.20 | Up   | 118333333.3 | 98373000    |
| Protein NDRG1                                                              | <i>Ndr1</i>    | 1.26 | Down | 1111040000  | 1398850000  |
| Protein NDRG2                                                              | <i>Ndr2</i>    | 1.06 | Up   | 5605875000  | 5266450000  |
| Protein NDRG3                                                              | <i>Ndr3</i>    | 1.04 | Down | 553065000   | 575900000   |
| Protein NDRG4                                                              | <i>Ndr4</i>    | 1.15 | Down | 236507500   | 271947500   |
| Protein O-GlcNAcase                                                        | <i>Mgea5</i>   | 1.34 | Up   | 488135000   | 363450000   |
| Protein OSCP1                                                              | <i>Oscp1</i>   | 1.47 | Down | 36332000    | 53496000    |
| Protein pelota homolog                                                     | <i>Pelo</i>    | 1.21 | Up   | 27770000    | 22960000    |

|                                                                                |                 |      |      |             |             |
|--------------------------------------------------------------------------------|-----------------|------|------|-------------|-------------|
| Protein phosphatase 1 regulatory subunit 7                                     | <i>Ppp1r7</i>   | 1.09 | Up   | 1627850000  | 1492325000  |
| Protein phosphatase 1A                                                         | <i>Ppm1a</i>    | 1.02 | Up   | 788775000   | 774885000   |
| Protein phosphatase 1B                                                         | <i>Ppm1b</i>    | 1.09 | Down | 608352500   | 663637500   |
| Protein phosphatase 1E                                                         | <i>Ppm1e</i>    | 1.05 | Down | 627067500   | 659900000   |
| Protein phosphatase 1F                                                         | <i>Ppm1f</i>    | 1.21 | Down | 164513333.3 | 199640000   |
| Protein phosphatase 1G                                                         | <i>Ppm1g</i>    | 1.14 | Up   | 233922500   | 204920000   |
| Protein phosphatase 1H                                                         | <i>Ppm1h</i>    | 1.00 | Down | 177426666.7 | 177913333.3 |
| Protein phosphatase inhibitor 2                                                | <i>Ppp1r2</i>   | 1.56 | Down | 170503333.3 | 265972500   |
| Protein phosphatase methylesterase 1                                           | <i>Ppme1</i>    | 1.06 | Up   | 964700000   | 909240000   |
| Protein piccolo                                                                | <i>Pclo</i>     | 1.31 | Up   | 843476666.7 | 642910000   |
| Protein prune homolog 2                                                        | <i>Prune2</i>   | 1.07 | Down | 118271000   | 126069750   |
| Protein Red                                                                    | <i>Ik</i>       | 1.28 | Down | 62397666.67 | 79752000    |
| Protein RER1                                                                   | <i>Rer1</i>     | 1.13 | Down | 1316300000  | 1484400000  |
| Protein rogdi homolog                                                          | <i>Rogdi</i>    | 1.07 | Up   | 406275000   | 380302500   |
| Protein RUFY3                                                                  | <i>Rufy3</i>    | 1.17 | Up   | 2018600000  | 1731450000  |
| Protein S100-B                                                                 | <i>S100b</i>    | 1.22 | Up   | 351300000   | 288945000   |
| Protein SCAF8                                                                  | <i>Scaf8</i>    | 1.08 | Up   | 161740000   | 149805000   |
| Protein SEC13 homolog                                                          | <i>Sec13</i>    | 1.17 | Up   | 388720000   | 333227500   |
| Protein sel-1 homolog 1                                                        | <i>Sell1</i>    | 1.05 | Up   | 96554500    | 91771333.33 |
| Protein SET                                                                    | <i>Set</i>      | 1.11 | Up   | 1895800000  | 1709850000  |
| Protein TBRG4                                                                  | <i>Tbrg4</i>    | 1.22 | Up   | 119392750   | 97522000    |
| Protein THEM6                                                                  | <i>Them6</i>    | 1.56 | Up   | 98520000    | 63031000    |
| Protein transport protein Sec31A                                               | <i>Sec31a</i>   | 1.05 | Down | 913962500   | 963597500   |
| Protein transport protein Sec61 subunit alpha isoform 1                        | <i>Sec61a1</i>  | 1.02 | Down | 142710000   | 146092500   |
| Protein TSSC1                                                                  | <i>Tssc1</i>    | 1.15 | Down | 80587000    | 92532000    |
| Protein tweety homolog 1                                                       | <i>Ttyh1</i>    | 1.02 | Up   | 1536875000  | 1513600000  |
| Protein tyrosine phosphatase type IVA 2                                        | <i>Ptp4a2</i>   | 1.05 | Up   | 226600000   | 216045000   |
| Protein unc-119 homolog A                                                      | <i>Unc119</i>   | 1.07 | Down | 1857225000  | 1993450000  |
| Protein VAC14 homolog                                                          | <i>Vac14</i>    | 1.02 | Down | 132955000   | 135232500   |
| Protein-arginine deiminase type-2                                              | <i>Padi2</i>    | 1.16 | Up   | 984100000   | 846582500   |
| Protein-L-isoaspartate(D-aspartate) O-methyltransferase                        | <i>Pcmt1</i>    | 1.06 | Down | 1094005000  | 1163725000  |
| Protein-S-isoprenylcysteine O-methyltransferase                                | <i>Icmt</i>     | 1.35 | Up   | 154280000   | 113876666.7 |
| Proto-oncogene tyrosine-protein kinase Src                                     | <i>Src</i>      | 1.12 | Up   | 338107500   | 300860000   |
| Purine nucleoside phosphorylase                                                | <i>Pnp</i>      | 1.15 | Up   | 1709825000  | 1485625000  |
| Putative ATP-dependent RNA helicase DHX30                                      | <i>Dhx30</i>    | 1.17 | Up   | 40738333.33 | 34917000    |
| Putative hydrolase RBBP9                                                       | <i>Rbbp9</i>    | 1.09 | Up   | 331876666.7 | 303482500   |
| Pyridoxal kinase                                                               | <i>Pdxk</i>     | 1.08 | Up   | 4256450000  | 3931000000  |
| Pyridoxal phosphate phosphatase                                                | <i>Pdxp</i>     | 1.05 | Up   | 2848325000  | 2707100000  |
| Pyridoxine-5-phosphate oxidase                                                 | <i>Pnpo</i>     | 1.42 | Down | 422367500   | 598005000   |
| Pyrroline-5-carboxylate reductase 2                                            | <i>Pycr2</i>    | 1.39 | Up   | 151030000   | 108680000   |
| Pyrroline-5-carboxylate reductase 3                                            | <i>Pycrl</i>    | 1.11 | Down | 311820000   | 346012500   |
| Pyruvate carboxylase, mitochondrial                                            | <i>Pc</i>       | 1.08 | Up   | 1964475000  | 1826250000  |
| Pyruvate dehydrogenase E1 component subunit alpha, somatic form, mitochondrial | <i>Pdha1</i>    | 1.20 | Down | 3426450000  | 4103825000  |
| Pyruvate dehydrogenase E1 component subunit beta, mitochondrial                | <i>Pdhb</i>     | 1.02 | Up   | 5552625000  | 5459925000  |
| Pyruvate kinase PKM                                                            | <i>Pkm</i>      | 1.04 | Up   | 1.1203E+11  | 1.07333E+11 |
| Quinone oxidoreductase                                                         | <i>Cryz</i>     | 1.13 | Up   | 1008857500  | 896560000   |
| Rab GDP dissociation inhibitor alpha                                           | <i>Gdi1</i>     | 1.04 | Up   | 30119000000 | 28842750000 |
| Rab GDP dissociation inhibitor beta                                            | <i>Gdi2</i>     | 1.19 | Up   | 9922000000  | 8315600000  |
| Rab GTPase-binding effector protein 1                                          | <i>Rabep1</i>   | 1.12 | Down | 81467000    | 91085000    |
| Rab3 GTPase-activating protein catalytic subunit                               | <i>Rab3gap1</i> | 1.44 | Up   | 126970000   | 88474750    |
| Rab3 GTPase-activating protein non-catalytic subunit                           | <i>Rab3gap2</i> | 1.30 | Down | 151643333.3 | 197082500   |
| Rabphilin-3A                                                                   | <i>Rph3a</i>    | 1.07 | Down | 1413460000  | 1516350000  |
| RAC-alpha serine/threonine-protein kinase                                      | <i>Akt1</i>     | 1.06 | Up   | 194075000   | 182420000   |
| Regulator complex protein LAMTOR1                                              | <i>Lamtor1</i>  | 1.03 | Up   | 179535000   | 173722500   |

|                                                                           |                      |       |      |             |             |
|---------------------------------------------------------------------------|----------------------|-------|------|-------------|-------------|
| Ral GTPase-activating protein subunit alpha-1                             | <i>Ralgap1</i>       | 1.11  | Up   | 47257000    | 42628333.33 |
| Ras-related C3 botulinum toxin substrate 1                                | <i>Rac1</i>          | 1.03  | Down | 4228875000  | 4358425000  |
| Ras-related GTP-binding protein A                                         | <i>Rraga</i>         | 1.09  | Up   | 173720000   | 159337500   |
| Ras-related protein Rab-10                                                | <i>Rab10</i>         | 1.23  | Up   | 619697500   | 501837500   |
| Ras-related protein Rab-11B;Ras-related protein Rab-11A                   | <i>Rab11b;Rab11a</i> | 1.09  | Down | 2444725000  | 2668675000  |
| Ras-related protein Rab-12                                                | <i>Rab12</i>         | 1.15  | Down | 71557000    | 82275000    |
| Ras-related protein Rab-14                                                | <i>Rab14</i>         | 1.04  | Up   | 2872900000  | 2749950000  |
| Ras-related protein Rab-18                                                | <i>Rab18</i>         | 1.03  | Up   | 1140630000  | 1110900000  |
| Ras-related protein Rab-1A                                                | <i>Rab1A</i>         | 1.01  | Down | 4676425000  | 4700525000  |
| Ras-related protein Rab-1B                                                | <i>Rab1b</i>         | 1.02  | Down | 1315775000  | 1347625000  |
| Ras-related protein Rab-21                                                | <i>Rab21</i>         | 1.24  | Down | 493895000   | 612417500   |
| Ras-related protein Rab-28                                                | <i>Rab28</i>         | 1.07  | Up   | 157527500   | 147850000   |
| Ras-related protein Rab-2A                                                | <i>Rab2a</i>         | 1.07  | Up   | 3218950000  | 3005750000  |
| Ras-related protein Rab-35                                                | <i>Rab35</i>         | 1.55  | Down | 372712500   | 576117500   |
| Ras-related protein Rab-3A                                                | <i>Rab3a</i>         | 1.15  | Up   | 9262950000  | 8025975000  |
| Ras-related protein Rab-3B                                                | <i>Rab3b</i>         | 1.20  | Up   | 645006666.7 | 536982500   |
| Ras-related protein Rab-3C                                                | <i>Rab3c</i>         | 1.48  | Up   | 681147500   | 459653333.3 |
| Ras-related protein Rab-4B                                                | <i>Rab4b</i>         | 1.02  | Down | 134517500   | 136763333.3 |
| Ras-related protein Rab-5A                                                | <i>Rab5a</i>         | 1.01  | Down | 1983875000  | 1997175000  |
| Ras-related protein Rab-6A                                                | <i>Rab6a</i>         | 1.27  | Down | 4471200000  | 5688000000  |
| Ras-related protein Rab-7a                                                | <i>Rab7a</i>         | 1.07  | Up   | 4918400000  | 4591250000  |
| Ras-related protein Rab-8A                                                | <i>Rab8a</i>         | 1.04  | Up   | 153575000   | 148186666.7 |
| Ras-related protein Rab-8B                                                | <i>Rab8b</i>         | 1.46  | Up   | 96372000    | 65839000    |
| Ras-related protein Ral-A                                                 | <i>Rala</i>          | 1.11  | Up   | 1267425000  | 1138492500  |
| Ras-related protein Ral-B                                                 | <i>Ralb</i>          | 1.29  | Down | 903775000   | 1165927500  |
| Ras-related protein Rap-1A                                                | <i>Rap1a</i>         | 1.03  | Down | 1882400000  | 1930500000  |
| Ras-related protein Rap-1b                                                | <i>Rap1b</i>         | 1.11  | Down | 406467500   | 449605000   |
| Ras-related protein R-Ras                                                 | <i>Rras</i>          | 1.16  | Up   | 179485000   | 155226666.7 |
| Receptor expression-enhancing protein 5                                   | <i>Reep5</i>         | 1.23  | Down | 484420000   | 594210000   |
| Receptor expression-enhancing protein 6                                   | <i>Reep6</i>         | 1.03  | Down | 1357032500  | 1398500000  |
| Receptor-type tyrosine-protein phosphatase alpha                          | <i>Ptpra</i>         | 2.17  | Down | 26060000    | 56626000    |
| Receptor-type tyrosine-protein phosphatase F                              | <i>Ptprf</i>         | 1.09  | Down | 445202500   | 486040000   |
| Receptor-type tyrosine-protein phosphatase zeta                           | <i>Ptprz1</i>        | 1.21  | Down | 74303666.67 | 90118500    |
| Redox-regulatory protein FAM213A                                          | <i>Fam213a</i>       | 1.10  | Up   | 590447500   | 535132500   |
| Regulator of G-protein signaling 7                                        | <i>Rgs7</i>          | 1.11  | Down | 556655000   | 620267500   |
| Regulator of G-protein signaling 9                                        | <i>Rgs9</i>          | 1.22  | Up   | 820292500   | 672115000   |
| Regulator of microtubule dynamics protein 3                               | <i>Rmdn3</i>         | 1.00  | Up   | 70074000    | 70068750    |
| Renin receptor                                                            | <i>Atp6ap2</i>       | 1.13  | Down | 383755000   | 434572500   |
| Replication initiator 1                                                   | <i>Repin1</i>        | 1.08  | Down | 10880500    | 11731500    |
| Replication protein A 32 kDa subunit                                      | <i>Rpa2</i>          | 1.09  | Down | 244867500   | 267005000   |
| Reticulon-1                                                               | <i>Rtn1</i>          | 1.12  | Down | 3390725000  | 3789475000  |
| Reticulon-3                                                               | <i>Rtn3</i>          | 1.05  | Up   | 3169825000  | 3009250000  |
| Reticulon-4                                                               | <i>Rtn4</i>          | 1.03  | Up   | 8819375000  | 8600650000  |
| Retinal dehydrogenase 1                                                   | <i>Aldh1a1</i>       | 11.69 | Down | 91349750    | 1067577500  |
| Retinol-binding protein 1                                                 | <i>Rbp1</i>          | 1.10  | Up   | 1912400000  | 1735725000  |
| Rho GDP-dissociation inhibitor 1                                          | <i>Arhgdia</i>       | 1.06  | Down | 3834700000  | 4078575000  |
| Rho GTPase-activating protein 44                                          | <i>Arhgap44</i>      | 1.34  | Down | 84239500    | 112710000   |
| Rho guanine nucleotide exchange factor 9                                  | <i>Arhgef9</i>       | 1.13  | Down | 100960000   | 114410000   |
| Rhodopsin                                                                 | <i>Rho</i>           | 1.08  | Up   | 26407750000 | 24357750000 |
| Rhodopsin kinase                                                          | <i>Grk1</i>          | 1.02  | Down | 2535050000  | 2588100000  |
| Rho-related GTP-binding protein RhoB                                      | <i>Rhob</i>          | 1.05  | Down | 215515000   | 225445000   |
| Ribonuclease inhibitor                                                    | <i>Rnh1</i>          | 1.08  | Up   | 827290000   | 768890000   |
| Ribonuclease UK114                                                        | <i>Hrsp12</i>        | 1.09  | Down | 646263333.3 | 704910000   |
| Ribose-phosphate pyrophosphokinase 1;Ribose-phosphate pyrophosphokinase 2 | <i>Prps1;Prps2</i>   | 1.08  | Down | 2841600000  | 3058025000  |
| Ribosomal protein S6 kinase alpha-1                                       | <i>Rps6ka1</i>       | 1.11  | Up   | 66309500    | 59865000    |
| Ribosome maturation protein SBDS                                          | <i>Sbds</i>          | 1.48  | Down | 74987000    | 111352750   |

|                                                                                                                                                                                  |                      |      |      |             |             |
|----------------------------------------------------------------------------------------------------------------------------------------------------------------------------------|----------------------|------|------|-------------|-------------|
| RNA polymerase II subunit A C-terminal domain phosphatase SSU72                                                                                                                  | <i>Ssu72</i>         | 1.03 | Down | 53078750    | 54678666.67 |
| RNA polymerase-associated protein LEO1                                                                                                                                           | <i>Leo1</i>          | 1.22 | Down | 81605500    | 99152333.33 |
| RNA-binding motif protein, X chromosome retrogene-like;RNA-binding motif protein, X chromosome retrogene-like, N-terminally processed;RNA binding motif protein, X-linked-like-1 | <i>Rbmxml;Rbmxl1</i> | 3.02 | Up   | 232250000   | 76812000    |
| RNA-binding motif protein, X chromosome;RNA-binding motif protein, X chromosome, N-terminally processed                                                                          | <i>RbmX</i>          | 1.02 | Down | 1961400000  | 2001475000  |
| RNA-binding protein 10                                                                                                                                                           | <i>Rbm10</i>         | 1.48 | Up   | 131406500   | 89069500    |
| RNA-binding protein 3                                                                                                                                                            | <i>Rbm3</i>          | 1.08 | Down | 200910000   | 216060000   |
| RNA-binding protein 4B                                                                                                                                                           | <i>Rbm4b</i>         | 1.06 | Up   | 191100000   | 180340000   |
| RNA-binding protein 8A                                                                                                                                                           | <i>Rbm8a</i>         | 1.52 | Down | 254630000   | 386995000   |
| RNA-binding protein Musashi homolog 1                                                                                                                                            | <i>Msi1</i>          | 1.09 | Down | 1970075000  | 2144100000  |
| RNA-binding protein Nova-1                                                                                                                                                       | <i>Nova1</i>         | 1.07 | Down | 120321750   | 128301750   |
| Rod outer segment membrane protein 1                                                                                                                                             | <i>Rom1</i>          | 1.00 | Up   | 1949975000  | 1941050000  |
| rRNA 2-O-methyltransferase fibrillarin                                                                                                                                           | <i>Fbl</i>           | 1.07 | Up   | 256220000   | 239622500   |
| RUS1 family protein C16orf58 homolog                                                                                                                                             | <i>N/A</i>           | 1.04 | Down | 136480000   | 141870000   |
| RuvB-like 1                                                                                                                                                                      | <i>Ruvbl1</i>        | 1.08 | Up   | 918832500   | 853235000   |
| Ryanodine receptor 2                                                                                                                                                             | <i>Ryr2</i>          | 1.11 | Down | 46720500    | 51808000    |
| Saccharopine dehydrogenase-like oxidoreductase                                                                                                                                   | <i>Sccpdh</i>        | 1.09 | Up   | 1352350000  | 1240350000  |
| S-adenosylmethionine synthase isoform type-2                                                                                                                                     | <i>Mat2a</i>         | 1.32 | Down | 508395000   | 671030000   |
| SAP domain-containing ribonucleoprotein                                                                                                                                          | <i>Sarnp</i>         | 1.23 | Down | 944910000   | 1161200000  |
| Sarcolemmal membrane-associated protein                                                                                                                                          | <i>Slmap</i>         | 1.20 | Up   | 3605025000  | 2996700000  |
| Sarcoplasmic/endoplasmic reticulum calcium ATPase 2                                                                                                                              | <i>Atp2a2</i>        | 1.03 | Down | 3168775000  | 3258175000  |
| Sarcosine dehydrogenase, mitochondrial                                                                                                                                           | <i>Sardh</i>         | 1.34 | Down | 82565000    | 110309750   |
| S-arrestin                                                                                                                                                                       | <i>Sag</i>           | 1.21 | Up   | 96800750000 | 79675250000 |
| Scaffold attachment factor B1                                                                                                                                                    | <i>Safb</i>          | 1.02 | Up   | 461730000   | 454822500   |
| Sec1 family domain-containing protein 1                                                                                                                                          | <i>Scfd1</i>         | 1.02 | Down | 196523333.3 | 200697500   |
| SEC14-like protein 2                                                                                                                                                             | <i>Sec14l2</i>       | 1.37 | Up   | 175510000   | 127936666.7 |
| Secernin-1                                                                                                                                                                       | <i>Scrn1</i>         | 1.14 | Up   | 2253975000  | 1977525000  |
| Secernin-2                                                                                                                                                                       | <i>Scrn2</i>         | 1.03 | Down | 429765000   | 443240000   |
| Secretagogin                                                                                                                                                                     | <i>Scgn</i>          | 1.03 | Down | 1755000000  | 1805575000  |
| Secretory carrier-associated membrane protein 1                                                                                                                                  | <i>Scamp1</i>        | 1.03 | Up   | 1431850000  | 1395725000  |
| Secretory carrier-associated membrane protein 5                                                                                                                                  | <i>Scamp5</i>        | 1.16 | Up   | 598747500   | 514072500   |
| Selenium-binding protein 1                                                                                                                                                       | <i>Selenbp1</i>      | 1.02 | Down | 123290000   | 125687500   |
| Selenocysteine lyase                                                                                                                                                             | <i>Scly</i>          | 1.15 | Down | 257877500   | 295410000   |
| Selenoprotein T                                                                                                                                                                  | <i>Selt</i>          | 1.16 | Down | 96403666.67 | 111700000   |
| Sepiapterin reductase                                                                                                                                                            | <i>Spr</i>           | 1.00 | Up   | 148627500   | 148045000   |
| Septin-11                                                                                                                                                                        | <i>Sep--11</i>       | 1.06 | Down | 2299300000  | 2437950000  |
| Septin-2                                                                                                                                                                         | <i>Sep--2</i>        | 1.07 | Up   | 1123650000  | 1046535000  |
| Septin-5                                                                                                                                                                         | <i>Sep--5</i>        | 1.03 | Up   | 2498075000  | 2416925000  |
| Septin-7                                                                                                                                                                         | <i>Sep--7</i>        | 1.46 | Up   | 3596500000  | 2466075000  |
| Septin-8                                                                                                                                                                         | <i>Sep--8</i>        | 1.00 | Down | 602317500   | 604175000   |
| Septin-9                                                                                                                                                                         | <i>Sep--9</i>        | 1.15 | Up   | 516305000   | 447475000   |
| Serine protease inhibitor A3K                                                                                                                                                    | <i>Serpina3k</i>     | 1.51 | Down | 132024666.7 | 199932500   |
| Serine/arginine-rich splicing factor 2                                                                                                                                           | <i>Srsf2</i>         | 1.11 | Up   | 1065990000  | 958195000   |
| Serine/arginine-rich splicing factor 5                                                                                                                                           | <i>Srsf5</i>         | 1.05 | Down | 320243333.3 | 336552500   |
| Serine/arginine-rich splicing factor 6                                                                                                                                           | <i>Srsf6</i>         | 1.04 | Down | 748063333.3 | 781485000   |
| Serine/threonine-protein kinase 24;Serine/threonine-protein kinase 24 35 kDa subunit;Serine/threonine-protein kinase 24 12 kDa subunit                                           | <i>Stk24</i>         | 1.61 | Up   | 104294333.3 | 64753000    |
| Serine/threonine-protein kinase A-Raf                                                                                                                                            | <i>Araf</i>          | 1.37 | Up   | 83004000    | 60522000    |
| Serine/threonine-protein kinase BRK2                                                                                                                                             | <i>Brsk2</i>         | 1.07 | Up   | 208770000   | 195107500   |
| Serine/threonine-protein kinase DCLK1                                                                                                                                            | <i>Dclk1</i>         | 1.25 | Down | 306647500   | 384375000   |

|                                                                                                                                           |                      |      |      |             |             |
|-------------------------------------------------------------------------------------------------------------------------------------------|----------------------|------|------|-------------|-------------|
| Serine/threonine-protein kinase DCLK2                                                                                                     | <i>Dclk2</i>         | 1.01 | Up   | 165895000   | 163965000   |
| Serine/threonine-protein kinase MARK2                                                                                                     | <i>Mark2</i>         | 1.33 | Up   | 40142500    | 30255500    |
| Serine/threonine-protein kinase mTOR                                                                                                      | <i>Mtor</i>          | 1.15 | Up   | 230965000   | 201340000   |
| Serine/threonine-protein kinase PAK 2;PAK-2p27;PAK-2p34                                                                                   | <i>Pak2</i>          | 1.20 | Down | 223215000   | 266893333.3 |
| Serine/threonine-protein kinase PAK 3                                                                                                     | <i>Pak3</i>          | 1.08 | Down | 1514900000  | 1629750000  |
| Serine/threonine-protein kinase TAO3                                                                                                      | <i>Taok3</i>         | 1.30 | Down | 118640000   | 154710000   |
| Serine/threonine-protein kinase WNK1;Serine/threonine-protein kinase WNK4                                                                 | <i>Wnk1;Wnk4</i>     | 1.03 | Up   | 58340000    | 56867000    |
| Serine/threonine-protein phosphatase 2A 55 kDa regulatory subunit B alpha isoform                                                         | <i>Ppp2r2a</i>       | 1.03 | Up   | 337285000   | 328932500   |
| Serine/threonine-protein phosphatase 2A 65 kDa regulatory subunit A beta isoform                                                          | <i>Ppp2r1b</i>       | 1.06 | Up   | 1155500000  | 1094775000  |
| Serine/threonine-protein phosphatase 2A catalytic subunit alpha isoform                                                                   | <i>Ppp2ca</i>        | 1.08 | Up   | 3995775000  | 3705925000  |
| Serine/threonine-protein phosphatase 2B catalytic subunit alpha isoform                                                                   | <i>Ppp3ca</i>        | 1.08 | Up   | 1322000000  | 1224275000  |
| Serine/threonine-protein phosphatase 2B catalytic subunit beta isoform                                                                    | <i>Ppp3cb</i>        | 1.05 | Up   | 230286666.7 | 218947500   |
| Serine/threonine-protein phosphatase 4 catalytic subunit                                                                                  | <i>Ppp4c</i>         | 1.21 | Down | 112535000   | 135670000   |
| Serine/threonine-protein phosphatase 5                                                                                                    | <i>Ppp5c</i>         | 1.04 | Up   | 593802500   | 571602500   |
| Serine/threonine-protein phosphatase 6 catalytic subunit;Serine/threonine-protein phosphatase 6 catalytic subunit, N-terminally processed | <i>Ppp6c</i>         | 1.19 | Down | 196230000   | 234075000   |
| Serine/threonine-protein phosphatase CPPED1                                                                                               | <i>Cpped1</i>        | 1.06 | Down | 82469000    | 87428333.33 |
| Serine/threonine-protein phosphatase PGAM5, mitochondrial                                                                                 | <i>Pgam5</i>         | 1.27 | Down | 96226500    | 122074666.7 |
| Serine/threonine-protein phosphatase PP1-alpha catalytic subunit                                                                          | <i>Ppp1ca</i>        | 1.18 | Down | 221720000   | 261602500   |
| Serine/threonine-protein phosphatase PP1-beta catalytic subunit                                                                           | <i>Ppp1cb</i>        | 1.28 | Up   | 442220000   | 344995000   |
| Serine/threonine-protein phosphatase PP1-gamma catalytic subunit                                                                          | <i>Ppp1cc</i>        | 1.09 | Up   | 4121775000  | 3783200000  |
| Serine-threonine kinase receptor-associated protein                                                                                       | <i>Strap</i>         | 1.13 | Down | 700285000   | 794575000   |
| Serine--tRNA ligase, cytoplasmic                                                                                                          | <i>Sars</i>          | 1.05 | Up   | 1865950000  | 1775475000  |
| Serotransferrin                                                                                                                           | <i>Tf</i>            | 1.01 | Up   | 3547475000  | 3514350000  |
| Serpin H1                                                                                                                                 | <i>Serpinh1</i>      | 1.61 | Up   | 193510000   | 120133333.3 |
| Serum albumin                                                                                                                             | <i>Alb</i>           | 1.03 | Down | 19192000000 | 19850750000 |
| Serum paraoxonase/arylesterase 2                                                                                                          | <i>Pon2</i>          | 1.19 | Up   | 303880000   | 255890000   |
| S-formylglutathione hydrolase                                                                                                             | <i>Esd</i>           | 1.01 | Up   | 3316125000  | 3298700000  |
| SH3 domain-containing kinase-binding protein 1                                                                                            | <i>Sh3kbp1</i>       | 1.86 | Up   | 47868000    | 25696500    |
| SH3-containing GRB2-like protein 3-interacting protein 1                                                                                  | <i>Sgip1</i>         | 1.02 | Down | 237450000   | 241025000   |
| Shootin-1                                                                                                                                 | <i>SHTN1</i>         | 1.10 | Up   | 31828500    | 29052500    |
| Short/branched chain specific acyl-CoA dehydrogenase, mitochondrial                                                                       | <i>Acadslb</i>       | 1.03 | Down | 165245000   | 170806666.7 |
| Sideroflexin-1                                                                                                                            | <i>Sfxn1</i>         | 1.00 | Up   | 1202000000  | 1201102500  |
| Sideroflexin-3                                                                                                                            | <i>Sfxn3</i>         | 1.04 | Up   | 4003750000  | 3837475000  |
| Sideroflexin-5                                                                                                                            | <i>Sfxn5</i>         | 1.06 | Up   | 1213290000  | 1140100000  |
| Signal recognition particle 54 kDa protein                                                                                                | <i>Srp54</i>         | 1.08 | Up   | 187326666.7 | 173645000   |
| Signal recognition particle receptor subunit beta                                                                                         | <i>Srprb</i>         | 1.06 | Down | 324102500   | 342970000   |
| Signal transducer and activator of transcription 3                                                                                        | <i>Stat3</i>         | 1.15 | Up   | 333137500   | 289377500   |
| Signal transducer and activator of transcription 5B;Signal transducer and activator of transcription 5A                                   | <i>Stat5b;Stat5a</i> | 1.24 | Up   | 337037500   | 272312500   |

|                                                                                                           |                    |      |      |             |             |
|-----------------------------------------------------------------------------------------------------------|--------------------|------|------|-------------|-------------|
| Single-stranded DNA-binding protein, mitochondrial                                                        | <i>Ssbp1</i>       | 1.14 | Up   | 338435000   | 296365000   |
| Sister chromatid cohesion protein PDS5 homolog B                                                          | <i>Pds5b</i>       | 1.07 | Up   | 288365000   | 269365000   |
| Small glutamine-rich tetratricopeptide repeat-containing protein alpha                                    | <i>Sgta</i>        | 1.10 | Down | 571772500   | 626810000   |
| Small nuclear ribonucleoprotein-associated protein N;Small nuclear ribonucleoprotein-associated protein B | <i>Snrpn;Snrpb</i> | 1.09 | Down | 1284407500  | 1403950000  |
| Sodium- and chloride-dependent GABA transporter 1                                                         | <i>Slc6a1</i>      | 1.16 | Up   | 2573050000  | 2213350000  |
| Sodium- and chloride-dependent GABA transporter 3                                                         | <i>Slc6a11</i>     | 1.01 | Down | 4406025000  | 4431925000  |
| Sodium- and chloride-dependent glycine transporter 1                                                      | <i>Slc6a9</i>      | 1.01 | Down | 1246575000  | 1260000000  |
| Sodium- and chloride-dependent taurine transporter                                                        | <i>Slc6a6</i>      | 1.06 | Down | 121843333.3 | 128672500   |
| Sodium bicarbonate cotransporter 3                                                                        | <i>Slc4a7</i>      | 1.17 | Up   | 451202500   | 384570000   |
| Sodium channel subunit beta-2                                                                             | <i>Scn2b</i>       | 1.30 | Down | 123630000   | 161150000   |
| Sodium/calcium exchanger 1                                                                                | <i>Slc8a1</i>      | 1.03 | Down | 527492500   | 541127500   |
| Sodium/calcium exchanger 3                                                                                | <i>Slc8a3</i>      | 1.13 | Up   | 117280000   | 104222500   |
| Sodium/potassium/calcium exchanger 1                                                                      | <i>Slc24a1</i>     | 1.32 | Down | 177730000   | 235337500   |
| Sodium/potassium-transporting ATPase subunit alpha-1                                                      | <i>Atp1a1</i>      | 1.06 | Up   | 19515750000 | 18458750000 |
| Sodium/potassium-transporting ATPase subunit alpha-2                                                      | <i>Atp1a2</i>      | 1.04 | Up   | 1241300000  | 1197500000  |
| Sodium/potassium-transporting ATPase subunit alpha-3                                                      | <i>Atp1a3</i>      | 1.01 | Down | 80839250000 | 81326500000 |
| Sodium/potassium-transporting ATPase subunit beta-1                                                       | <i>Atp1b1</i>      | 1.00 | Down | 9784775000  | 9814050000  |
| Sodium/potassium-transporting ATPase subunit beta-2                                                       | <i>Atp1b2</i>      | 1.05 | Up   | 2520100000  | 2407200000  |
| Sodium/potassium-transporting ATPase subunit beta-3                                                       | <i>Atp1b3</i>      | 1.12 | Up   | 6050200000  | 5397725000  |
| Sodium-coupled neutral amino acid transporter 1                                                           | <i>Slc38a1</i>     | 1.01 | Down | 138213333.3 | 139800000   |
| Sodium-coupled neutral amino acid transporter 3                                                           | <i>Slc38a3</i>     | 1.14 | Up   | 896325000   | 784575000   |
| Sodium-dependent neutral amino acid transporter SLC6A17                                                   | <i>Slc6a17</i>     | 1.21 | Up   | 260710000   | 215350000   |
| Sodium-driven chloride bicarbonate exchanger                                                              | <i>Slc4a10</i>     | 1.13 | Up   | 728967500   | 643257500   |
| Solute carrier family 12 member 4                                                                         | <i>Slc12a4</i>     | 1.27 | Up   | 79625500    | 62519000    |
| Solute carrier family 12 member 5                                                                         | <i>Slc12a5</i>     | 1.06 | Up   | 17085000000 | 16092500000 |
| Solute carrier family 12 member 7                                                                         | <i>Slc12a7</i>     | 1.20 | Up   | 183110000   | 152080000   |
| Solute carrier family 2, facilitated glucose transporter member 1                                         | <i>Slc2a1</i>      | 1.03 | Down | 3231675000  | 3329350000  |
| Solute carrier family 2, facilitated glucose transporter member 3                                         | <i>Slc2a3</i>      | 1.07 | Down | 321717500   | 344862500   |
| Solute carrier family 25 member 46                                                                        | <i>Slc25a46</i>    | 1.24 | Up   | 48822000    | 39464500    |
| Sorbitol dehydrogenase                                                                                    | <i>Sord</i>        | 1.05 | Up   | 246646666.7 | 235005000   |
| Sorting and assembly machinery component 50 homolog                                                       | <i>Samm50</i>      | 1.01 | Up   | 654022500   | 650327500   |
| Sorting nexin-1                                                                                           | <i>Snx1</i>        | 1.04 | Down | 416315000   | 432150000   |
| Sorting nexin-27                                                                                          | <i>Snx27</i>       | 1.15 | Up   | 542395000   | 471720000   |
| Sorting nexin-3                                                                                           | <i>Snx3</i>        | 1.02 | Up   | 423475000   | 413987500   |
| Sorting nexin-5                                                                                           | <i>Snx5</i>        | 1.18 | Down | 180912500   | 214070000   |
| SPARC                                                                                                     | <i>Sparc</i>       | 1.02 | Up   | 136928333.3 | 133952500   |
| Spectrin alpha chain, non-erythrocytic 1                                                                  | <i>Sptan1</i>      | 1.06 | Down | 26600500000 | 28065500000 |
| Spectrin beta chain, non-erythrocytic 2                                                                   | <i>Sptbn2</i>      | 1.02 | Down | 2536825000  | 2600125000  |
| Spermatid perinuclear RNA-binding protein                                                                 | <i>Strbp</i>       | 1.11 | Down | 327503333.3 | 363865000   |
| S-phase kinase-associated protein 1                                                                       | <i>Skp1</i>        | 1.28 | Down | 571392500   | 733552500   |
| Spliceosome RNA helicase Ddx39b                                                                           | <i>Ddx39b</i>      | 1.07 | Up   | 13133250000 | 12272250000 |

|                                                                                               |                |      |      |            |             |
|-----------------------------------------------------------------------------------------------|----------------|------|------|------------|-------------|
| Splicing factor 3A subunit 2                                                                  | <i>Sf3a2</i>   | 1.04 | Down | 352065000  | 367212500   |
| Splicing factor U2AF 26 kDa subunit                                                           | <i>U2af114</i> | 1.06 | Down | 348540000  | 369882500   |
| SPRY domain-containing protein 4                                                              | <i>Spryd4</i>  | 1.16 | Up   | 189885000  | 164257500   |
| Squalene synthase                                                                             | <i>Fdft1</i>   | 1.00 | Down | 140610000  | 140670000   |
| Src substrate cortactin                                                                       | <i>Cttn</i>    | 1.25 | Down | 551412500  | 690572500   |
| STAM-binding protein                                                                          | <i>Stambp</i>  | 1.11 | Down | 77872000   | 86784000    |
| Staphylococcal nuclease domain-containing protein 1                                           | <i>Snd1</i>    | 1.00 | Down | 1160075000 | 1165675000  |
| Stathmin                                                                                      | <i>Stmn1</i>   | 1.12 | Up   | 336470000  | 300377500   |
| STE20/SPS1-related proline-alanine-rich protein kinase                                        | <i>Stk39</i>   | 1.12 | Down | 109460000  | 122720000   |
| Steroid hormone receptor ERR2                                                                 | <i>Esrrb</i>   | 1.37 | Up   | 71196500   | 52100000    |
| Sterol-4-alpha-carboxylate 3-dehydrogenase, decarboxylating                                   | <i>Nsdhl</i>   | 1.22 | Down | 104900000  | 127516666.7 |
| Stomatin-like protein 2, mitochondrial                                                        | <i>Stoml2</i>  | 1.16 | Up   | 315772500  | 271677500   |
| Stress-70 protein, mitochondrial                                                              | <i>Hspa9</i>   | 1.01 | Down | 7398450000 | 7493350000  |
| Stress-induced-phosphoprotein 1                                                               | <i>Stip1</i>   | 1.03 | Up   | 4715325000 | 4584025000  |
| Striatin-3                                                                                    | <i>Strn3</i>   | 1.04 | Down | 152775000  | 158786666.7 |
| Stromal interaction molecule 1                                                                | <i>Stim1</i>   | 1.15 | Up   | 165247500  | 143662500   |
| Structural maintenance of chromosomes protein 1A                                              | <i>Smc1a</i>   | 1.34 | Down | 611392500  | 819747500   |
| Structural maintenance of chromosomes protein 3                                               | <i>Smc3</i>    | 1.04 | Down | 581857500  | 605362500   |
| Succinate dehydrogenase [ubiquinone] cytochrome b small subunit, mitochondrial                | <i>Sdhb</i>    | 1.19 | Up   | 163987250  | 138220666.7 |
| Succinate dehydrogenase [ubiquinone] flavoprotein subunit, mitochondrial                      | <i>Sdha</i>    | 1.17 | Up   | 3935325000 | 3368800000  |
| Succinate dehydrogenase [ubiquinone] iron-sulfur subunit, mitochondrial                       | <i>Sdhb</i>    | 1.06 | Up   | 1604900000 | 1508050000  |
| Succinate-semialdehyde dehydrogenase, mitochondrial                                           | <i>Aldh5a1</i> | 1.02 | Down | 4163250000 | 4255475000  |
| Succinyl-CoA ligase [ADP/GDP-forming] subunit alpha, mitochondrial                            | <i>Suclg1</i>  | 1.18 | Down | 3339200000 | 3938100000  |
| Succinyl-CoA:3-ketoacid coenzyme A transferase 1, mitochondrial                               | <i>Oxct1</i>   | 1.16 | Down | 1127907500 | 1306827500  |
| Sulfated glycoprotein 1                                                                       | <i>Psap</i>    | 1.01 | Down | 509285000  | 515987500   |
| Sulfite oxidase, mitochondrial                                                                | <i>Suox</i>    | 1.02 | Up   | 234365000  | 229715000   |
| Sulfotransferase 4A1                                                                          | <i>Sult4a1</i> | 1.05 | Up   | 87122500   | 82898500    |
| SUMO-activating enzyme subunit 1;SUMO-activating enzyme subunit 1, N-terminally processed     | <i>Sae1</i>    | 1.12 | Up   | 1472700000 | 1320275000  |
| SUMO-conjugating enzyme UBC9                                                                  | <i>Ube2i</i>   | 1.04 | Up   | 839395000  | 807437500   |
| Superoxide dismutase [Cu-Zn]                                                                  | <i>Sod1</i>    | 1.34 | Down | 6953700000 | 9313725000  |
| Superoxide dismutase [Mn], mitochondrial                                                      | <i>Sod2</i>    | 1.26 | Down | 3240400000 | 4075425000  |
| Suppressor of G2 allele of SKP1 homolog                                                       | <i>Sugt1</i>   | 1.06 | Down | 360217500  | 380930000   |
| Survival of motor neuron-related-splicing factor 30                                           | <i>Smdc1</i>   | 1.14 | Down | 135375000  | 153753333.3 |
| SWI/SNF-related matrix-associated actin-dependent regulator of chromatin subfamily E member 1 | <i>Smarca1</i> | 1.14 | Down | 88763000   | 100844250   |
| Synapsin-1                                                                                    | <i>Syn1</i>    | 1.05 | Up   | 4880575000 | 4627325000  |
| Synapsin-2                                                                                    | <i>Syn2</i>    | 1.09 | Up   | 1732950000 | 1589400000  |
| Synaptic vesicle glycoprotein 2A                                                              | <i>Sv2a</i>    | 1.12 | Down | 4487575000 | 5012825000  |
| Synaptic vesicle glycoprotein 2B                                                              | <i>Sv2b</i>    | 1.05 | Up   | 3880975000 | 3691600000  |
| Synaptic vesicle membrane protein VAT-1 homolog                                               | <i>Vat1</i>    | 1.04 | Down | 1342875000 | 1390625000  |
| Synaptobrevin homolog YKT6                                                                    | <i>Ykt6</i>    | 1.04 | Down | 214685000  | 224200000   |
| Synaptogyrin-1                                                                                | <i>Syngr1</i>  | 1.14 | Up   | 1517000000 | 1326300000  |
| Synaptojanin-1                                                                                | <i>Synj1</i>   | 1.01 | Up   | 6085625000 | 6003750000  |
| Synaptojanin-2-binding protein                                                                | <i>Synj2bp</i> | 1.26 | Up   | 131640000  | 104662750   |
| Synaptophysin                                                                                 | <i>Syp</i>     | 1.02 | Up   | 6568025000 | 6432950000  |
| Synaptoporin                                                                                  | <i>Synpr</i>   | 1.31 | Up   | 3362525000 | 2575875000  |
| Synaptosomal-associated protein 25                                                            | <i>Snap25</i>  | 1.38 | Down | 1777875000 | 2458325000  |

|                                                                           |                 |      |      |             |             |
|---------------------------------------------------------------------------|-----------------|------|------|-------------|-------------|
| Synaptotagmin-1                                                           | <i>Syt1</i>     | 1.07 | Up   | 20616500000 | 19315500000 |
| Synergism gamma                                                           | <i>Synrg</i>    | 1.28 | Up   | 77271750    | 60272500    |
| Syntaxin-12                                                               | <i>Stx12</i>    | 1.09 | Up   | 564302500   | 518855000   |
| Syntaxin-1A                                                               | <i>Stx1a</i>    | 1.13 | Down | 153806666.7 | 174343333.3 |
| Syntaxin-1B                                                               | <i>Stx1b</i>    | 1.03 | Down | 4578000000  | 4723000000  |
| Syntaxin-3                                                                | <i>Stx3</i>     | 1.08 | Up   | 2040875000  | 1898100000  |
| Syntaxin-4                                                                | <i>Stx4</i>     | 1.07 | Up   | 44740000    | 41763250    |
| Syntaxin-7                                                                | <i>Stx7</i>     | 1.08 | Down | 244536666.7 | 263545000   |
| Syntaxin-binding protein 1                                                | <i>Stxbp1</i>   | 1.03 | Up   | 32669000000 | 31744500000 |
| Syntaxin-binding protein 5                                                | <i>Stxbp5</i>   | 1.05 | Up   | 515200000   | 489430000   |
| Syntenin-1                                                                | <i>Sdcbp</i>    | 1.08 | Up   | 278740000   | 258766666.7 |
| Tail-anchored protein insertion receptor WRB                              | <i>Wrb</i>      | 1.06 | Down | 83905500    | 88536500    |
| Target of rapamycin complex subunit LST8                                  | <i>Mlst8</i>    | 1.38 | Up   | 62205000    | 45208000    |
| T-complex protein 1 subunit alpha                                         | <i>Tcp1</i>     | 1.02 | Up   | 6685625000  | 6527375000  |
| T-complex protein 1 subunit beta                                          | <i>Cct2</i>     | 1.02 | Up   | 5406450000  | 5325475000  |
| T-complex protein 1 subunit delta                                         | <i>Cct4</i>     | 1.03 | Up   | 6755650000  | 6556350000  |
| T-complex protein 1 subunit epsilon                                       | <i>Cct5</i>     | 1.04 | Up   | 5777400000  | 5572925000  |
| T-complex protein 1 subunit gamma                                         | <i>Cct3</i>     | 1.01 | Down | 7184175000  | 7277150000  |
| Tectonin beta-propeller repeat-containing protein 1                       | <i>Tecpr1</i>   | 1.21 | Up   | 164236666.7 | 135565000   |
| Tenascin-R                                                                | <i>Tnr</i>      | 1.05 | Up   | 1080647500  | 1030092500  |
| Tetratricopeptide repeat protein 9C                                       | <i>Ttc9c</i>    | 1.21 | Up   | 76186000    | 63159000    |
| Thiamine-triphosphatase                                                   | <i>Thtpa</i>    | 1.47 | Down | 98002000    | 144545000   |
| Thimet oligopeptidase                                                     | <i>Thop1</i>    | 1.08 | Up   | 2974025000  | 2743875000  |
| Thioredoxin                                                               | <i>Txn</i>      | 1.25 | Down | 879995000   | 1098555000  |
| Thioredoxin domain-containing protein 12                                  | <i>Txndc12</i>  | 1.04 | Down | 296112500   | 308317500   |
| Thioredoxin domain-containing protein 9                                   | <i>Txndc9</i>   | 1.04 | Up   | 70813000    | 67984500    |
| Thioredoxin reductase 1, cytoplasmic                                      | <i>Txnrd1</i>   | 1.03 | Up   | 836972500   | 816035000   |
| Thioredoxin reductase 2, mitochondrial                                    | <i>Txnrd2</i>   | 1.44 | Down | 48753000    | 70265750    |
| Thioredoxin-dependent peroxide reductase, mitochondrial                   | <i>Prdx3</i>    | 1.22 | Up   | 1675425000  | 1378250000  |
| Thioredoxin-like protein 1                                                | <i>Txnl1</i>    | 1.02 | Down | 915105000   | 936362500   |
| Thioredoxin-related transmembrane protein 2                               | <i>Tmx2</i>     | 1.04 | Down | 137690000   | 143350000   |
| Thiosulfate sulfurtransferase                                             | <i>Tst</i>      | 1.11 | Up   | 859970000   | 772370000   |
| THO complex subunit 6 homolog                                             | <i>Thoc6</i>    | 2.04 | Up   | 80596000    | 39597500    |
| Threonine--tRNA ligase, cytoplasmic                                       | <i>Tars</i>     | 1.18 | Up   | 1267650000  | 1075850000  |
| Threonine--tRNA ligase, mitochondrial                                     | <i>Tars2</i>    | 1.59 | Up   | 84227500    | 52861000    |
| Thy-1 membrane glycoprotein                                               | <i>Thy1</i>     | 1.06 | Up   | 2387200000  | 2245575000  |
| Thyroid hormone receptor-associated protein 3                             | <i>Thrap3</i>   | 1.11 | Down | 88340500    | 97908000    |
| T-kininogen 1;T-kininogen 1 heavy chain;T-kinin;T-kininogen 1 light chain | <i>Map1</i>     | 1.20 | Up   | 151596666.7 | 126384000   |
| Toll-interacting protein                                                  | <i>Tollip</i>   | 1.01 | Down | 572852500   | 577695000   |
| Torsin-1A-interacting protein 1                                           | <i>Tor1aip1</i> | 1.03 | Down | 307905000   | 315810000   |
| Trafficking protein particle complex subunit 1                            | <i>Trappc1</i>  | 1.30 | Up   | 286165000   | 220397500   |
| Trafficking protein particle complex subunit 2                            | <i>Trappc2</i>  | 1.00 | Up   | 160100000   | 160025000   |
| Trafficking protein particle complex subunit 2-like protein               | <i>Trappc2l</i> | 1.08 | Down | 63559000    | 68520500    |
| Trafficking protein particle complex subunit 3                            | <i>Trappc3</i>  | 1.05 | Down | 340727500   | 358202500   |
| Trafficking protein particle complex subunit 4                            | <i>Trappc4</i>  | 1.07 | Up   | 124727500   | 116191500   |
| Transaldolase                                                             | <i>Taldo1</i>   | 1.01 | Up   | 10657475000 | 10560425000 |
| Transcription activator BRG1                                              | <i>Smarca4</i>  | 1.21 | Up   | 505662500   | 416695000   |
| Transcription elongation factor A protein 1                               | <i>Tcea1</i>    | 1.01 | Down | 620927500   | 629307500   |
| Transcription elongation factor B polypeptide 1                           | <i>Tceb1</i>    | 1.07 | Up   | 619627500   | 576407500   |

|                                                                                                                             |                |      |      |             |             |
|-----------------------------------------------------------------------------------------------------------------------------|----------------|------|------|-------------|-------------|
| Transcription elongation factor B polypeptide 2                                                                             | <i>Tceb2</i>   | 1.01 | Down | 695107500   | 700152500   |
| Transcription initiation factor IIB                                                                                         | <i>Gtf2b</i>   | 1.46 | Down | 78263333.33 | 114628666.7 |
| Transcription intermediary factor 1-beta                                                                                    | <i>Trim28</i>  | 1.06 | Up   | 3449475000  | 3257400000  |
| Transcriptional activator protein Pur-alpha                                                                                 | <i>Pura</i>    | 1.16 | Down | 2988525000  | 3456550000  |
| Transcriptional activator protein Pur-beta                                                                                  | <i>Purb</i>    | 1.11 | Down | 2697150000  | 3006925000  |
| Transcriptional repressor CTCF                                                                                              | <i>Ctcf</i>    | 1.90 | Down | 34962666.67 | 66479250    |
| Transferrin receptor protein 1                                                                                              | <i>Tfrc</i>    | 1.05 | Up   | 99044250    | 94668750    |
| Transformer-2 protein homolog beta                                                                                          | <i>Tra2b</i>   | 1.21 | Up   | 375363333.3 | 310995000   |
| Transforming protein RhoA                                                                                                   | <i>Rhoa</i>    | 1.08 | Down | 2619425000  | 2833125000  |
| Transgelin                                                                                                                  | <i>Tagln</i>   | 1.11 | Down | 503730000   | 557707500   |
| Transgelin-2                                                                                                                | <i>Tagln2</i>  | 1.06 | Up   | 710737500   | 671445000   |
| Transgelin-3                                                                                                                | <i>Tagln3</i>  | 1.08 | Down | 3464500000  | 3730650000  |
| Transitional endoplasmic reticulum ATPase                                                                                   | <i>Vcp</i>     | 1.05 | Up   | 15793000000 | 15104250000 |
| Transketolase                                                                                                               | <i>Tkt</i>     | 1.01 | Up   | 37281250000 | 36774250000 |
| Translation initiation factor eIF-2B subunit alpha                                                                          | <i>Eif2b1</i>  | 1.02 | Up   | 94491000    | 92966333.33 |
| Translation initiation factor eIF-2B subunit beta                                                                           | <i>Eif2b2</i>  | 1.01 | Down | 135920000   | 136650000   |
| Translation initiation factor eIF-2B subunit delta                                                                          | <i>Eif2b4</i>  | 1.10 | Down | 95128000    | 104539000   |
| Translation initiation factor eIF-2B subunit epsilon                                                                        | <i>Eif2b5</i>  | 1.16 | Down | 73034000    | 84616000    |
| Translationally-controlled tumor protein                                                                                    | <i>Tpt1</i>    | 1.02 | Up   | 1307100000  | 1277525000  |
| Translin-associated protein X                                                                                               | <i>Tsnax</i>   | 1.19 | Up   | 928185000   | 782005000   |
| Translocon-associated protein subunit alpha                                                                                 | <i>Ssr1</i>    | 1.31 | Up   | 270030000   | 206600000   |
| Translocon-associated protein subunit delta                                                                                 | <i>Ssr4</i>    | 1.03 | Up   | 375200000   | 362737500   |
| Transmembrane 9 superfamily member 2                                                                                        | <i>Tm9sf2</i>  | 1.13 | Up   | 212426666.7 | 188177500   |
| Transmembrane emp24 domain-containing protein 10                                                                            | <i>Tmed10</i>  | 1.15 | Up   | 935800000   | 817102500   |
| Transmembrane emp24 domain-containing protein 2                                                                             | <i>Tmed2</i>   | 1.18 | Up   | 250300000   | 211665000   |
| Transmembrane emp24 domain-containing protein 7                                                                             | <i>Tmed7</i>   | 1.08 | Up   | 617145000   | 571037500   |
| Transmembrane emp24 domain-containing protein 9                                                                             | <i>Tmed9</i>   | 1.10 | Up   | 360995000   | 328862500   |
| Transmembrane protein 11, mitochondrial                                                                                     | <i>Tmem11</i>  | 1.07 | Up   | 306173333.3 | 285792500   |
| Transmembrane protein 33                                                                                                    | <i>Tmem33</i>  | 1.12 | Up   | 159195000   | 142597500   |
| Transmembrane protein 43                                                                                                    | <i>Tmem43</i>  | 1.05 | Down | 83275333.33 | 87113000    |
| Tricarboxylate transport protein, mitochondrial                                                                             | <i>Slc25a1</i> | 1.12 | Up   | 480727500   | 428960000   |
| Trifunctional enzyme subunit alpha, mitochondrial;Long-chain enoyl-CoA hydratase;Long chain 3-hydroxyacyl-CoA dehydrogenase | <i>Hadha</i>   | 1.15 | Up   | 3086000000  | 2682700000  |
| Trifunctional enzyme subunit beta, mitochondrial;3-ketoacyl-CoA thiolase                                                    | <i>Hadhb</i>   | 1.08 | Up   | 1779450000  | 1647400000  |
| Triosephosphate isomerase                                                                                                   | <i>Tpi1</i>    | 1.00 | Up   | 64398250000 | 64240000000 |
| Tripartite motif-containing protein 2                                                                                       | <i>Trim2</i>   | 1.48 | Up   | 258530000   | 174747500   |
| Tripartite motif-containing protein 3                                                                                       | <i>Trim3</i>   | 1.09 | Up   | 175020000   | 160805000   |
| Tripeptidyl-peptidase 1                                                                                                     | <i>Tpp1</i>    | 1.01 | Down | 746463333.3 | 751680000   |
| Tripeptidyl-peptidase 2                                                                                                     | <i>Tpp2</i>    | 1.01 | Up   | 699282500   | 692732500   |
| tRNA-dihydrouridine(47) synthase [NAD(P)(+)]-like                                                                           | <i>Dus3l</i>   | 1.22 | Up   | 145213333.3 | 119230000   |
| tRNA-splicing ligase RtcB homolog                                                                                           | <i>Rtcb</i>    | 1.03 | Up   | 3169125000  | 3072075000  |
| Trophoblast glycoprotein                                                                                                    | <i>Tpbg</i>    | 1.72 | Down | 49395000    | 84988000    |
| Tropomodulin-2                                                                                                              | <i>Tmod2</i>   | 1.06 | Down | 551965000   | 584470000   |
| Tropomyosin alpha-3 chain                                                                                                   | <i>Tpm3</i>    | 1.14 | Up   | 360455000   | 316755000   |
| Tryptophan--tRNA ligase, cytoplasmic;T1-TrpRS;T2-TrpRS                                                                      | <i>Wars</i>    | 1.08 | Down | 1040112500  | 1120125000  |

|                                                                                                                                                                                                                         |                             |      |      |             |             |
|-------------------------------------------------------------------------------------------------------------------------------------------------------------------------------------------------------------------------|-----------------------------|------|------|-------------|-------------|
| Tubulin alpha-1A chain;Tubulin alpha-3 chain                                                                                                                                                                            | <i>Tuba1a;Tuba3a</i>        | 1.07 | Up   | 1.86443E+11 | 1.7469E+11  |
| Tubulin alpha-1B chain                                                                                                                                                                                                  | <i>Tuba1b</i>               | 1.03 | Up   | 17442000000 | 16899750000 |
| Tubulin alpha-4A chain                                                                                                                                                                                                  | <i>Tuba4a</i>               | 1.05 | Up   | 7466925000  | 7129725000  |
| Tubulin beta-2B chain                                                                                                                                                                                                   | <i>Tubb2b</i>               | 1.04 | Up   | 41901750000 | 40449750000 |
| Tubulin beta-3 chain                                                                                                                                                                                                    | <i>Tubb3</i>                | 1.08 | Down | 9903000000  | 10717400000 |
| Tubulin beta-4B chain                                                                                                                                                                                                   | <i>Tubb4b</i>               | 1.04 | Up   | 1.2388E+11  | 1.1906E+11  |
| Tubulin beta-5 chain                                                                                                                                                                                                    | <i>Tubb5</i>                | 1.11 | Up   | 19009750000 | 17191750000 |
| Tubulin gamma-1 chain                                                                                                                                                                                                   | <i>Tubg1</i>                | 1.26 | Down | 40820000    | 51503000    |
| Tubulin polymerization-promoting protein family member 3                                                                                                                                                                | <i>Tppp3</i>                | 1.57 | Down | 350595000   | 549615000   |
| Tubulin-specific chaperone A                                                                                                                                                                                            | <i>Tbca</i>                 | 1.12 | Up   | 163950000   | 146713333.3 |
| Tudor domain-containing protein 7                                                                                                                                                                                       | <i>Tdrd7</i>                | 1.21 | Down | 126440000   | 152600000   |
| Tumor protein p63-regulated gene 1-like protein                                                                                                                                                                         | <i>Tprg1l</i>               | 1.03 | Down | 65446500    | 67715000    |
| Tumor susceptibility gene 101 protein                                                                                                                                                                                   | <i>Tsg101</i>               | 1.11 | Up   | 299720000   | 269277500   |
| Twinfilin-1                                                                                                                                                                                                             | <i>Twfl1</i>                | 1.07 | Up   | 338676666.7 | 318000000   |
| Type 2 phosphatidylinositol 4,5-bisphosphate 4-phosphatase                                                                                                                                                              | <i>Tmem55a</i>              | 1.30 | Down | 100459000   | 130140000   |
| Type I inositol 3,4-bisphosphate 4-phosphatase                                                                                                                                                                          | <i>Inpp4a</i>               | 1.05 | Down | 248762500   | 261187500   |
| Tyrosine 3-monooxygenase                                                                                                                                                                                                | <i>Th</i>                   | 1.87 | Down | 54232000    | 101462000   |
| Tyrosine-protein phosphatase non-receptor type 11                                                                                                                                                                       | <i>Ptpn11</i>               | 1.06 | Down | 1067007500  | 1130125000  |
| Tyrosine-protein phosphatase non-receptor type 23                                                                                                                                                                       | <i>Ptpn23</i>               | 1.08 | Down | 164062500   | 177257500   |
| Tyrosine-protein phosphatase non-receptor type substrate 1                                                                                                                                                              | <i>Sirpa</i>                | 1.30 | Up   | 262620000   | 201465000   |
| Tyrosine--tRNA ligase, cytoplasmic;Tyrosine--tRNA ligase, cytoplasmic, N-terminally processed                                                                                                                           | <i>Yars</i>                 | 1.16 | Down | 1192372500  | 1388525000  |
| Tyrosyl-DNA phosphodiesterase 1                                                                                                                                                                                         | <i>Tdp1</i>                 | 1.45 | Down | 9693800     | 14101000    |
| U1 small nuclear ribonucleoprotein C                                                                                                                                                                                    | <i>Snrpc</i>                | 1.20 | Down | 348402500   | 418890000   |
| U4/U6.U5 tri-snRNP-associated protein 1                                                                                                                                                                                 | <i>Sart1</i>                | 1.05 | Down | 110525000   | 116420000   |
| U5 small nuclear ribonucleoprotein 200 kDa helicase                                                                                                                                                                     | <i>Snrnp200</i>             | 1.09 | Down | 2106350000  | 2303400000  |
| Ubiquilin-1                                                                                                                                                                                                             | <i>Ubqln1</i>               | 1.04 | Down | 431950000   | 450232500   |
| Ubiquitin carboxyl-terminal hydrolase 10                                                                                                                                                                                | <i>Usp10</i>                | 1.11 | Up   | 172682500   | 155995000   |
| Ubiquitin carboxyl-terminal hydrolase 19                                                                                                                                                                                | <i>Usp19</i>                | 1.49 | Down | 66728000    | 99718000    |
| Ubiquitin carboxyl-terminal hydrolase 7                                                                                                                                                                                 | <i>Usp7</i>                 | 1.04 | Down | 1102022500  | 1141675000  |
| Ubiquitin carboxyl-terminal hydrolase isozyme L1                                                                                                                                                                        | <i>Uchl1</i>                | 1.04 | Down | 9070375000  | 9404700000  |
| Ubiquitin carboxyl-terminal hydrolase isozyme L3                                                                                                                                                                        | <i>Uchl3</i>                | 1.27 | Down | 245136666.7 | 310247500   |
| Ubiquitin fusion degradation protein 1 homolog                                                                                                                                                                          | <i>Ufd1l</i>                | 1.08 | Down | 216415000   | 232760000   |
| Ubiquitin thioesterase OTUB1                                                                                                                                                                                            | <i>Otub1</i>                | 1.03 | Down | 2404850000  | 2478925000  |
| Ubiquitin-40S ribosomal protein S27a;Ubiquitin-40S ribosomal protein S27a;Ubiquitin-60S ribosomal protein L40;Ubiquitin-60S ribosomal protein L40;Polyubiquitin-B;Ubiquitin;Polyubiquitin-C;Ubiquitin;Ubiquitin-related | <i>Rps27a;Uba52;Ubb;Ubc</i> | 1.12 | Down | 13056500000 | 14682500000 |
| Ubiquitin-conjugating enzyme E2 D2                                                                                                                                                                                      | <i>Ube2d2</i>               | 1.07 | Up   | 822830000   | 769910000   |
| Ubiquitin-conjugating enzyme E2 N                                                                                                                                                                                       | <i>Ube2n</i>                | 1.00 | Down | 2985775000  | 2995875000  |
| Ubiquitin-conjugating enzyme E2 variant 2                                                                                                                                                                               | <i>Ube2v2</i>               | 1.08 | Up   | 1087542500  | 1010097500  |
| Ubiquitin-conjugating enzyme E2 Z                                                                                                                                                                                       | <i>Ube2z</i>                | 1.37 | Up   | 218840000   | 159480000   |
| Ubiquitin-fold modifier-conjugating enzyme 1                                                                                                                                                                            | <i>Ufc1</i>                 | 1.02 | Up   | 250720000   | 246913333.3 |
| Ubiquitin-like domain-containing CTD phosphatase 1                                                                                                                                                                      | <i>Ublcp1</i>               | 1.01 | Up   | 498237500   | 491237500   |
| Ubiquitin-like modifier-activating enzyme 1                                                                                                                                                                             | <i>Uba1</i>                 | 1.01 | Up   | 15074000000 | 14944000000 |

|                                                                                  |                     |      |      |             |             |
|----------------------------------------------------------------------------------|---------------------|------|------|-------------|-------------|
| Ubiquitin-like protein 4A                                                        | <i>Ubl4a</i>        | 1.19 | Down | 158355000   | 188377500   |
| Ubiquitin-like-conjugating enzyme ATG3                                           | <i>Atg3</i>         | 1.09 | Up   | 138110000   | 126900000   |
| UBX domain-containing protein 1                                                  | <i>Ubxn1</i>        | 1.13 | Up   | 232557500   | 205085000   |
| UBX domain-containing protein 4                                                  | <i>Ubxn4</i>        | 1.05 | Down | 169940000   | 179250000   |
| UDP-glucose 4-epimerase                                                          | <i>Gale</i>         | 1.22 | Up   | 420020000   | 345370000   |
| UDP-glucose 6-dehydrogenase                                                      | <i>Ugdh</i>         | 1.42 | Up   | 110595000   | 77697000    |
| UDP-glucose:glycoprotein glucosyltransferase 1                                   | <i>Ugg1</i>         | 1.01 | Down | 921495000   | 933007500   |
| UDP-N-acetylglucosamine--peptide N-acetylglucosaminyltransferase 110 kDa subunit | <i>Ogt</i>          | 1.13 | Up   | 653770000   | 579725000   |
| UMP-CMP kinase                                                                   | <i>Cmpk1</i>        | 1.01 | Down | 1187475000  | 1200650000  |
| Uncharacterized protein C12orf43 homolog                                         | N/A                 | 1.06 | Down | 113100000   | 120165000   |
| Uncharacterized protein C6orf136 homolog                                         | N/A                 | 1.01 | Down | 53788000    | 54112000    |
| Unconventional myosin-Ib                                                         | <i>Myo1b</i>        | 1.22 | Up   | 133962500   | 109612500   |
| Unconventional myosin-Va                                                         | <i>Myo5a</i>        | 1.04 | Up   | 1928725000  | 1853900000  |
| UPF0160 protein MYG1, mitochondrial                                              | <i>Myg1</i>         | 1.09 | Up   | 214400000   | 196640000   |
| UPF0562 protein C7orf55 homolog                                                  | <i>LOC108099353</i> | 1.14 | Down | 54016000    | 61316333.33 |
| UPF0587 protein C1orf123 homolog                                                 | N/A                 | 1.14 | Up   | 65202000    | 57350000    |
| UPF0598 protein C8orf82 homolog                                                  | N/A                 | 1.20 | Up   | 115908750   | 96206000    |
| UPF0696 protein C11orf68 homolog                                                 | <i>Bles03</i>       | 1.11 | Down | 187760000   | 207790000   |
| Up-regulated during skeletal muscle growth protein 5                             | <i>Usmg5</i>        | 1.09 | Down | 1394642500  | 1522575000  |
| Urea transporter 1                                                               | <i>Slc14a1</i>      | 1.75 | Up   | 367257500   | 209727500   |
| UV excision repair protein RAD23 homolog B                                       | <i>Rad23b</i>       | 1.03 | Up   | 305842500   | 297020000   |
| Vacuolar protein sorting-associated protein 26A                                  | <i>Vps26a</i>       | 1.19 | Up   | 138732500   | 116463250   |
| Vacuolar protein sorting-associated protein 28 homolog                           | <i>Vps28</i>        | 1.29 | Up   | 156110000   | 121356666.7 |
| Vacuolar protein sorting-associated protein 29                                   | <i>Vps29</i>        | 1.08 | Up   | 577587500   | 532382500   |
| Vacuolar protein sorting-associated protein 33A                                  | <i>Vps33a</i>       | 1.40 | Down | 64095000    | 89625000    |
| Vacuolar protein sorting-associated protein 33B                                  | <i>Vps33b</i>       | 1.28 | Up   | 60992000    | 47815000    |
| Vacuolar protein sorting-associated protein 45                                   | <i>Vps45</i>        | 1.16 | Up   | 305176666.7 | 264075000   |
| Vacuolar protein sorting-associated protein 4A                                   | <i>Vps4a</i>        | 1.01 | Down | 316662500   | 319947500   |
| Vacuole membrane protein 1                                                       | <i>Vmp1</i>         | 1.24 | Up   | 101030000   | 81744000    |
| Valine--tRNA ligase                                                              | <i>Vars</i>         | 1.07 | Up   | 1804525000  | 1690300000  |
| Very long-chain specific acyl-CoA dehydrogenase, mitochondrial                   | <i>Acadvl</i>       | 1.11 | Down | 238315000   | 265570000   |
| Very-long-chain 3-oxoacyl-CoA reductase                                          | <i>Hsd17b12</i>     | 1.51 | Up   | 283850000   | 187745000   |
| Very-long-chain enoyl-CoA reductase                                              | <i>Tecr</i>         | 1.09 | Up   | 898845000   | 822965000   |
| Vesicle-associated membrane protein 2                                            | <i>Vamp2</i>        | 1.22 | Up   | 9263825000  | 7604325000  |
| Vesicle-associated membrane protein-associated protein A                         | <i>Vapa</i>         | 1.14 | Down | 2392500000  | 2715575000  |
| Vesicle-associated membrane protein-associated protein B                         | <i>Vapb</i>         | 1.05 | Up   | 1230507500  | 1171680000  |
| Vesicle-fusing ATPase                                                            | <i>Nsf</i>          | 1.06 | Up   | 36787000000 | 34569000000 |
| Vesicle-trafficking protein SEC22b                                               | <i>Sec22b</i>       | 1.11 | Up   | 637600000   | 573762500   |
| Vesicular acetylcholine transporter                                              | <i>Slc18a3</i>      | 1.50 | Up   | 129949666.7 | 86501500    |
| Vesicular glutamate transporter 1                                                | <i>Slc17a7</i>      | 1.07 | Down | 1148925000  | 1225775000  |
| Vesicular inhibitory amino acid transporter                                      | <i>Slc32a1</i>      | 1.02 | Down | 3696300000  | 3781900000  |
| Vigilin                                                                          | <i>Hdlbp</i>        | 1.01 | Up   | 949707500   | 944950000   |
| Vimentin                                                                         | <i>Vim</i>          | 1.01 | Up   | 55972000000 | 55646250000 |
| Vinculin                                                                         | <i>Vcl</i>          | 1.07 | Up   | 1393850000  | 1300425000  |
| Visinin-like protein 1                                                           | <i>Vsnl1</i>        | 1.01 | Up   | 1012837500  | 1001747500  |

|                                                                                                                                                                 |                 |      |      |             |             |
|-----------------------------------------------------------------------------------------------------------------------------------------------------------------|-----------------|------|------|-------------|-------------|
| Vitamin K epoxide reductase complex subunit 1-like protein 1                                                                                                    | <i>Vkorc1l1</i> | 1.05 | Up   | 239882500   | 227992500   |
| Voltage-dependent anion-selective channel protein 1                                                                                                             | <i>Vdac1</i>    | 1.00 | Up   | 36267500000 | 36119000000 |
| Voltage-dependent anion-selective channel protein 2                                                                                                             | <i>Vdac2</i>    | 1.06 | Up   | 10400425000 | 9768250000  |
| Voltage-dependent anion-selective channel protein 3                                                                                                             | <i>Vdac3</i>    | 1.05 | Up   | 9989125000  | 9532000000  |
| Voltage-dependent calcium channel subunit alpha-2/delta-1;Voltage-dependent calcium channel subunit alpha-2-1;Voltage-dependent calcium channel subunit delta-1 | <i>Cacna2d1</i> | 1.12 | Up   | 579695000   | 518835000   |
| Voltage-dependent calcium channel subunit alpha-2/delta-2;Voltage-dependent calcium channel subunit alpha-2-2;Voltage-dependent calcium channel subunit delta-2 | <i>Cacna2d2</i> | 1.17 | Up   | 1132682500  | 967927500   |
| Voltage-gated potassium channel subunit beta-2                                                                                                                  | <i>Kcnab2</i>   | 1.13 | Down | 125685000   | 142492500   |
| V-type proton ATPase 116 kDa subunit a isoform 1                                                                                                                | <i>Atp6v0a1</i> | 1.11 | Up   | 12073750000 | 10919000000 |
| V-type proton ATPase 16 kDa proteolipid subunit                                                                                                                 | <i>Atp6v0c</i>  | 1.04 | Down | 2727625000  | 2846300000  |
| V-type proton ATPase subunit B, brain isoform                                                                                                                   | <i>Atp6v1b2</i> | 1.08 | Up   | 15493000000 | 14403750000 |
| V-type proton ATPase subunit C 1                                                                                                                                | <i>Atp6v1c1</i> | 1.02 | Up   | 4043350000  | 3958725000  |
| V-type proton ATPase subunit E 1                                                                                                                                | <i>Atp6v1e1</i> | 1.24 | Down | 5877350000  | 7277675000  |
| V-type proton ATPase subunit F                                                                                                                                  | <i>Atp6v1f</i>  | 1.07 | Up   | 418135000   | 392235000   |
| V-type proton ATPase subunit S1                                                                                                                                 | <i>Atp6ap1</i>  | 1.02 | Down | 501245000   | 510790000   |
| WD repeat-containing protein 1                                                                                                                                  | <i>Wdr1</i>     | 1.04 | Up   | 7641625000  | 7334450000  |
| WD repeat-containing protein 44                                                                                                                                 | <i>Wdr44</i>    | 1.28 | Down | 62067000    | 79526750    |
| WD repeat-containing protein 5                                                                                                                                  | <i>Wdr5</i>     | 1.02 | Down | 383645000   | 389910000   |
| WD repeat-containing protein 6                                                                                                                                  | <i>Wdr6</i>     | 1.92 | Down | 10836000    | 20762000    |
| WD repeat-containing protein 61;WD repeat-containing protein 61, N-terminally processed                                                                         | <i>Wdr61</i>    | 1.09 | Down | 310337500   | 339242500   |
| WD repeat-containing protein 7                                                                                                                                  | <i>Wdr7</i>     | 1.07 | Up   | 1715100000  | 1609525000  |
| WD repeat-containing protein 89                                                                                                                                 | <i>Wdr89</i>    | 1.13 | Down | 104470000   | 118205000   |
| WD40 repeat-containing protein SMU1;WD40 repeat-containing protein SMU1, N-terminally processed                                                                 | <i>Smu1</i>     | 1.37 | Down | 448995000   | 615107500   |
| Wiskott-Aldrich syndrome protein family member 1                                                                                                                | <i>Wasf1</i>    | 1.09 | Down | 75764000    | 82269750    |
| WW domain-binding protein 11                                                                                                                                    | <i>Wbp11</i>    | 1.11 | Up   | 122970000   | 110304000   |
| WW domain-binding protein 2                                                                                                                                     | <i>Wbp2</i>     | 1.00 | Up   | 661360000   | 659000000   |
| Xaa-Pro aminopeptidase 1;Xaa-Pro aminopeptidase 1, N-terminally processed                                                                                       | <i>Xpnpep1</i>  | 1.06 | Up   | 829977500   | 784485000   |
| Xaa-Pro dipeptidase                                                                                                                                             | <i>Pepd</i>     | 1.07 | Up   | 886640000   | 828695000   |
| Y-box-binding protein 3                                                                                                                                         | <i>Ybx3</i>     | 1.03 | Down | 51431000    | 53194000    |
| Zinc finger protein 22                                                                                                                                          | <i>Znf22</i>    | 1.47 | Up   | 45265666.67 | 30708000    |
| Zinc finger protein 652                                                                                                                                         | <i>Znf652</i>   | 1.63 | Down | 7768200     | 12693000    |
| Zinc finger Ran-binding domain-containing protein 2                                                                                                             | <i>Zranb2</i>   | 1.02 | Up   | 79320000    | 77915000    |
| Zinc finger RNA-binding protein                                                                                                                                 | <i>Zfr</i>      | 1.27 | Down | 271942500   | 344887500   |
| Zinc phosphodiesterase ELAC protein 2                                                                                                                           | <i>Elac2</i>    | 1.01 | Up   | 36486000    | 36055000    |
| ZW10 interactor                                                                                                                                                 | <i>Zwint</i>    | 1.08 | Up   | 208970000   | 194270000   |
