# Supplementary material for: The Small Heat Shock Protein α-Crystallin B Shows Neuroprotective Properties in a Glaucoma Animal Model
Source: MDPI journal article supplement (doi:10.3390/ijms18112418), 2017-11-14
Supplement: s1 [file s1]

| Protein name                                                            | Gene name       | Fold-change ratio | Regulation | Mean LFQ intensity Alpha Crystallin B Group | Mean LFQ intensity PBS Group |
|-------------------------------------------------------------------------|-----------------|-------------------|------------|---------------------------------------------|------------------------------|
| 40S ribosomal protein S15                                               | <i>Rps15</i>    | 1.93              | Down       | 54261000                                    | 104496000                    |
| 60S ribosomal protein L32                                               | <i>Rpl32</i>    | 1.55              | Down       | 511965000                                   | 792492500                    |
| Acetyl-CoA carboxylase 1;Biotin carboxylase                             | <i>Acaca</i>    | 1.72              | Up         | 254480000                                   | 147957500                    |
| Activated RNA polymerase II transcriptional coactivator p15             | <i>Sub1</i>     | 2.24              | Up         | 1161980000                                  | 518802500                    |
| Activity-dependent neuroprotector homeobox protein                      | <i>Adnp</i>     | 1.82              | Down       | 62292500                                    | 113136000                    |
| ADP-sugar pyrophosphatase                                               | <i>Nudt5</i>    | 2.13              | Up         | 130560000                                   | 61229000                     |
| Alpha-1B-glycoprotein                                                   | <i>A1bg</i>     | 1.68              | Up         | 142690000                                   | 84804000                     |
| Alpha-internexin                                                        | <i>Ina</i>      | 2.32              | Down       | 636297500                                   | 1474150000                   |
| Anion exchange protein 2                                                | <i>Slc4a2</i>   | 1.57              | Up         | 75682500                                    | 48292000                     |
| ATP synthase protein 8                                                  | <i>Mt-atp8</i>  | 1.72              | Up         | 210400000                                   | 122442500                    |
| ATP-binding cassette sub-family A member 2                              | <i>Abca2</i>    | 1.78              | Down       | 888925000                                   | 1581000000                   |
| Beta-arrestin-1                                                         | <i>Arrb1</i>    | 2.07              | Up         | 595772500                                   | 288182500                    |
| Beta-crystallin A3;Beta-crystallin A3                                   | <i>Cryba1</i>   | 1.58              | Up         | 271492500                                   | 171631500                    |
| Beta-crystallin A4                                                      | <i>Cryba4</i>   | 3.39              | Up         | 85191750                                    | 25144500                     |
| Beta-crystallin B2                                                      | <i>Crybb2</i>   | 1.89              | Up         | 1062927500                                  | 561807500                    |
| Beta-crystallin S                                                       | <i>Crygs</i>    | 1.68              | Up         | 107755000                                   | 64106750                     |
| Calcium-binding mitochondrial carrier protein SCaMC-2                   | <i>Slc25a25</i> | 1.56              | Up         | 108535333                                   | 69402000                     |
| Casein kinase I isoform delta                                           | <i>Csnk1d</i>   | 2.17              | Down       | 10006000                                    | 21690000                     |
| Cellular nucleic acid-binding protein                                   | <i>Cnbp</i>     | 1.54              | Down       | 203021250                                   | 312617500                    |
| Clathrin light chain A                                                  | <i>Clta</i>     | 1.77              | Up         | 846083333                                   | 478195000                    |
| Clusterin;Clusterin beta chain;Clusterin alpha chain                    | <i>Clu</i>      | 1.91              | Up         | 189795000                                   | 99412500                     |
| Creatine kinase M-type                                                  | <i>Ckm</i>      | 1.70              | Up         | 641130000                                   | 377383333                    |
| Diphosphoinositol polyphosphate phosphohydrolase 2                      | <i>Nudt4</i>    | 1.51              | Up         | 59385000                                    | 39292000                     |
| DNA topoisomerase 1                                                     | <i>Top1</i>     | 1.52              | Up         | 57442000                                    | 37900000                     |
| DNA topoisomerase 2-alpha                                               | <i>Top2a</i>    | 1.81              | Up         | 152155000                                   | 83870333.3                   |
| Dual specificity tyrosine-phosphorylation-regulated kinase 1A           | <i>Dyrk1a</i>   | 1.60              | Down       | 74864000                                    | 119740000                    |
| Electron transfer flavoprotein-ubiquinone oxidoreductase, mitochondrial | <i>Etf1dh</i>   | 1.66              | Up         | 133353333                                   | 80505000                     |
| Eukaryotic translation initiation factor 1A                             | <i>Eif1a</i>    | 1.67              | Up         | 102425500                                   | 61270000                     |
| Fibrinogen alpha chain;Fibrinopeptide A;Fibrinogen alpha chain          | <i>Fga</i>      | 1.86              | Down       | 65288500                                    | 121578750                    |

|                                                                              |                   |      |      |            |            |
|------------------------------------------------------------------------------|-------------------|------|------|------------|------------|
| Filamin-C                                                                    | <i>Flnc</i>       | 1.55 | Up   | 222650000  | 143610000  |
| Gamma-crystallin B                                                           | <i>Crygb</i>      | 1.70 | Down | 168032500  | 285753333  |
| Gamma-crystallin C                                                           | <i>Crygc</i>      | 1.99 | Up   | 41397650   | 20802250   |
| Glycine cleavage system<br>H protein,<br>mitochondrial                       | <i>Gcsh</i>       | 1.76 | Up   | 142490000  | 80924000   |
| Golgi resident protein<br>GCP60                                              | <i>Acbd3</i>      | 1.97 | Up   | 117733500  | 59821500   |
| GPI inositol-deacylase                                                       | <i>Pgap1</i>      | 1.74 | Down | 81943500   | 142834750  |
| Guanine nucleotide-<br>binding protein<br>G(I)/G(S)/G(O) subunit<br>gamma-11 | <i>Gng11</i>      | 2.00 | Down | 317790000  | 634080000  |
| Hemoglobin subunit<br>beta-2                                                 | <i>Hbb-b2</i>     | 2.31 | Down | 1296967500 | 2997475000 |
| Histone H2A type 2-A                                                         | <i>Hist2h2aa3</i> | 1.99 | Down | 4218075000 | 8381700000 |
| Histone H2B type<br>1;Histone H2B type 1-A                                   | <i>Hist1h2ba</i>  | 1.78 | Down | 4303400000 | 7642825000 |
| Histone H3.3;Histone<br>H3.1                                                 | <i>H3f3b</i>      | 1.87 | Down | 925393333  | 1734025000 |
| Histone H4;Osteogenic<br>growth peptide                                      | <i>Hist1h4b</i>   | 2.07 | Down | 2266950000 | 4700975000 |
| Lamin-B1                                                                     | <i>Lmnb1</i>      | 3.42 | Down | 1433960000 | 4896975000 |
| Large neutral amino<br>acids transporter small<br>subunit 1                  | <i>Slc7a5</i>     | 5.14 | Up   | 132143000  | 25704000   |
| Liprin-alpha-3                                                               | <i>Ppfia3</i>     | 1.50 | Up   | 132940000  | 88788000   |
| Methyl-CpG-binding<br>protein 2                                              | <i>Mecp2</i>      | 1.84 | Down | 217625000  | 399940000  |
| Mitochondrial pyruvate<br>carrier 1                                          | <i>Mpc1</i>       | 2.28 | Up   | 796500000  | 348980000  |
| Myristoylated alanine-<br>rich C-kinase substrate                            | <i>Marcks</i>     | 2.47 | Up   | 1760595000 | 713300000  |
| NAD-dependent protein<br>deacylase sirtuin-5,<br>mitochondrial               | <i>Sirt5</i>      | 1.88 | Up   | 172790000  | 91968666.7 |
| Neurofilament light<br>polypeptide                                           | <i>Nefl</i>       | 1.98 | Down | 545370000  | 1078150000 |
| Neuronal calcium sensor<br>1                                                 | <i>Ncs1</i>       | 1.79 | Down | 42340000   | 75598000   |
| Non-histone<br>chromosomal protein<br>HMG-17                                 | <i>Hmgn2</i>      | 1.51 | Down | 316087500  | 476235000  |
| Nucleoporin NUP53                                                            | <i>Nup35</i>      | 1.84 | Down | 61615000   | 113388667  |
| Nucleoprotein TPR                                                            | <i>Tpr</i>        | 1.54 | Down | 393040000  | 606462500  |
| NudC domain-<br>containing protein 2                                         | <i>Nudcd2</i>     | 2.07 | Up   | 85053333.3 | 41075000   |
| Peptidyl-prolyl cis-trans<br>isomerase F,<br>mitochondrial                   | <i>Ppif</i>       | 1.68 | Down | 49242000   | 82583000   |
| Peroxisomal biogenesis<br>factor 19                                          | <i>Pex19</i>      | 1.74 | Up   | 42736000   | 24579000   |
| Peroxisomal membrane<br>protein PEX14                                        | <i>Pex14</i>      | 1.64 | Up   | 101900000  | 62250000   |
| Phospholipid<br>hydroperoxide<br>glutathione peroxidase                      | <i>Gpx4</i>       | 1.99 | Up   | 1290360000 | 647730000  |
| Plectin                                                                      | <i>Plec</i>       | 1.71 | Down | 554365000  | 949052500  |
| Podocalyxin                                                                  | <i>Podxl</i>      | 2.08 | Up   | 119540500  | 57478000   |
| Polyamine-modulated<br>factor 1-binding protein<br>1                         | <i>Pmf1bp1</i>    | 2.49 | Up   | 755560000  | 302990000  |
| Prelamin-A/C;Lamin-<br>A/C                                                   | <i>Lmna</i>       | 3.58 | Down | 341547500  | 1222425000 |

|                                                                          |                       |       |      |            |            |
|--------------------------------------------------------------------------|-----------------------|-------|------|------------|------------|
| Probable 2-oxoglutarate dehydrogenase E1 component DHKTD1, mitochondrial | <i>Dhtkd1</i>         | 1.51  | Down | 35048500   | 52998000   |
| Prosaposin receptor GPR37                                                | <i>Gpr37</i>          | 2.10  | Up   | 671413333  | 319330000  |
| Protein BUD31 homolog                                                    | <i>Bud31</i>          | 2.88  | Down | 28350666.7 | 81558275   |
| Protein Hikeshi                                                          | <i>HIKESHI</i>        | 2.18  | Down | 38476000   | 84060000   |
| Protein phosphatase inhibitor 2                                          | <i>Ppp1r2</i>         | 1.56  | Down | 170503333  | 265972500  |
| Protein THEM6                                                            | <i>Them6</i>          | 1.56  | Up   | 98520000   | 63031000   |
| Ras-related protein Rab-35                                               | <i>Rab35</i>          | 1.55  | Down | 372712500  | 576117500  |
| Receptor-type tyrosine-protein phosphatase alpha                         | <i>Ptptra</i>         | 2.17  | Down | 26060000   | 56626000   |
| Retinal dehydrogenase 1                                                  | <i>Aldh1a1</i>        | 11.69 | Down | 91349750   | 1067577500 |
| RNA-binding motif protein, X chromosome retrogene-like                   | <i>Rbmxrtl;Rbmxl1</i> | 3.02  | Up   | 232250000  | 76812000   |
| RNA-binding protein 8A                                                   | <i>Rbm8a</i>          | 1.52  | Down | 254630000  | 386995000  |
| Serine protease inhibitor A3K                                            | <i>Serpina3k</i>      | 1.51  | Down | 132024667  | 199932500  |
| Serine/threonine-protein kinase 24                                       | <i>Stk24</i>          | 1.61  | Up   | 104294333  | 64753000   |
| Serpin H1                                                                | <i>Serpinh1</i>       | 1.61  | Up   | 193510000  | 120133333  |
| SH3 domain-containing kinase-binding protein 1                           | <i>Sh3kbp1</i>        | 1.86  | Up   | 47868000   | 25696500   |
| THO complex subunit 6 homolog                                            | <i>Thoc6</i>          | 2.04  | Up   | 80596000   | 39597500   |
| Threonine--tRNA ligase, mitochondrial                                    | <i>Tars2</i>          | 1.59  | Up   | 84227500   | 52861000   |
| Transcriptional repressor CTCF                                           | <i>Ctcf</i>           | 1.90  | Down | 34962666.7 | 66479250   |
| Trophoblast glycoprotein                                                 | <i>Tpbg</i>           | 1.72  | Down | 49395000   | 84988000   |
| Tubulin polymerization-promoting protein family member 3                 | <i>Tppp3</i>          | 1.57  | Down | 350595000  | 549615000  |
| Tyrosine 3-monooxygenase                                                 | <i>Th</i>             | 1.87  | Down | 54232000   | 101462000  |
| Urea transporter 1                                                       | <i>Slc14a1</i>        | 1.75  | Up   | 367257500  | 209727500  |
| Very-long-chain 3-oxoacyl-CoA reductase                                  | <i>Hsd17b12</i>       | 1.51  | Up   | 283850000  | 187745000  |
| WD repeat-containing protein 6                                           | <i>Wdr6</i>           | 1.92  | Down | 10836000   | 20762000   |
| Zinc finger protein 652                                                  | <i>Znf652</i>         | 1.63  | Down | 7768200    | 12693000   |
